# Supplementary material
Source: Royal Society of Chemistry journal article supplement (doi:10.1039/d6cc01624c)
Supplement: d6cc01624c1.pdf [file d6cc01624c1.pdf]

## Supporting Information

### **Spiro-[indene-1,2'-indolin] Scaffolds via Rh (III) Catalyzed C-H Activation/[3+2]Spiroannulation**

Imtiaj Mondal\*, Gracy Salam, Sudip Karmakar, Koushik Naskar, Dibas Dandapat, Ng Shereinai Bliss, Moumita Chowdhury and Indubhusan Deb\*

Organic & Medicinal Chemistry Division, CSIR-Indian Institute of Chemical Biology, 4-Raja S.C. Mullick Road, Jadavpur, Kolkata 700032, India

\*E-mail: [indubhusandeb@iicb.res.in](mailto:indubhusandeb@iicb.res.in), [indubhusandeb@gmail.com](mailto:indubhusandeb@gmail.com), [imtiaj612@gmail.com](mailto:imtiaj612@gmail.com)

#### Table of Contents

---

|                                                                                              |           |
|----------------------------------------------------------------------------------------------|-----------|
| <b>General Information</b>                                                                   | S2        |
| <b>General Procedure for the Preparation of Starting Materials</b>                           | S3        |
| <b>General Procedure for Annulation Reaction (Milligram and Gram Scale Reaction)</b>         | S3-S4     |
| <b>Mechanistic Experiments</b>                                                               | S5 – S7   |
| <b>General Procedure for the Preparation of the Rhodacycle Complex (Rh-1b)</b>               | S8        |
| <b>Procedure for the Treatment of the Rhodacycle Complex Rh-1b as Catalyst and Substrate</b> | S8-S9     |
| <b>References</b>                                                                            | S9        |
| <b>Additional Optimisation Table and Unsuccessful Substrates</b>                             | S9-S10    |
| <b>Characterization of Cyclic Products</b>                                                   | S11 – S29 |
| <b><sup>1</sup>H, <sup>13</sup>C and <sup>19</sup>F NMR Spectra of Compounds</b>             | S30 – S77 |

---

### General Information:

All reactions were carried out in oven-dried Schlenk tubes under an argon atmosphere unless otherwise mentioned. TLC analysis was performed on silica gel TLC plates. Column chromatography was done using 230–400 mesh silica gel by applying pressure through an air pump.  $^1\text{H}$  and  $^{13}\text{C}$ ,  $^{19}\text{F}$  NMR spectra were recorded on a 400 MHz spectrometer and are reported as chemical shifts ( $\delta$ ) in parts per million (ppm), and multiplicities are abbreviated as s = singlet, d = doublet, t = triplet, q = quartet, m = multiplet, comp = complex, app = apparent. Internal standards or residual solvent signals were used as references. HRMS ( $m/z$ ) was recorded using ESI (Q-ToF, positive ion) mode, EI, and LTQ-Orbitrap. Melting points were determined in a capillary melting point apparatus and were uncorrected. Optical rotation of compounds measured from Anton Paar made MCP 100 polarimeter, and HPLC purity data for compounds **4a-4e** were recorded using a Shim-pack GIST, C18-5 $\mu\text{m}$  column and Phenomenex<sup>TM</sup> Luna 5  $\mu\text{m}$  C18(2) 100 Å, LC Column 250 x 4.6 mm column in MeCN/H<sub>2</sub>O solvent system. Single-crystal X-ray diffraction data were collected on a Bruker D8 Venture with microfocus optics using Cu K $\alpha$  radiation. The CIF files were submitted to CCDC (2534747-2534750, 2552131, and 2551983) and can be obtained at <https://summary.ccdc.cam.ac.uk/structure-summary-form>. 2-aryl-3*H*-indole<sup>1</sup> and Ynones/Ynoates<sup>2</sup> were prepared following literature methods. Single crystals of the cyclized compounds were obtained by taking 5-10 mg of the sample in 5 mL vials using a bi-solvent system applying the solvent diffusion technique. The choice of solvent systems and method for crystal growth for each compound (**3a**, **3h**, **3l**, **3m**, **5m**, and **5n**) are provided in the characterization data section.

## General Procedure for the Preparation of Starting Materials:

### (a) Preparation of Directing Group:

The corresponding heterocyclic 2-phenyl-3*H*-indole (**1**) was synthesized from various substituted carbonyl compounds **SI1** with hydrazine hydrochloride **SI2** by following a known literature procedure.<sup>1</sup>

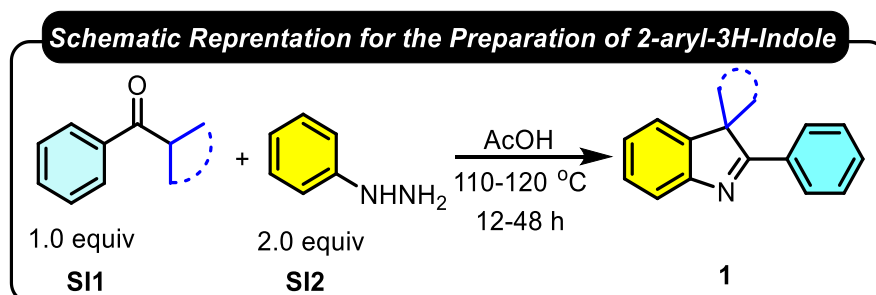

To a solution of hydrazine hydrochloride (2.0 equiv) in acetic acid was added corresponding carbonyl compounds (1.0 equiv) under an argon atmosphere. And then the reaction mixture was stirred at 100 °C in an oil bath for 12 h to 48 h (monitored by TLC). The solvent was removed under vacuum, and the residue was then quenched by saturated NaHCO<sub>3</sub> solution and extracted with dichloromethane three times. The organic layer was dried over Na<sub>2</sub>SO<sub>4</sub> and evaporated under vacuum. Finally, the residue was purified by column chromatography (PE/EA 2-5%) to afford the respective products **1**.

### General Procedure for Spiro-Annulation Reaction:

#### (0.2 mmol scale):

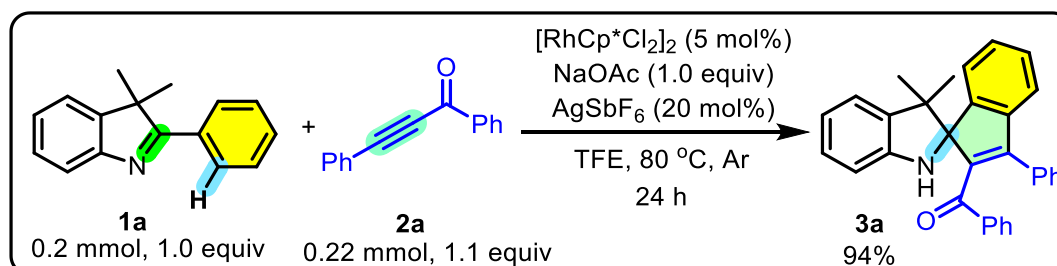

In an oven-dried 10 mL Schlenk tube, 3,3-dimethyl-2-phenyl-3*H*-indole (**1a**) (44.2 mg, 0.2 mmol, 1.0 equiv), 1,3-diphenylprop-2-yn-1-one (**2a**) (45.4 mg, 0.22 mmol, 1.1 equiv), [Cp\**RhCl*<sub>2</sub>]<sub>2</sub> (6.2 mg, 0.01 mmol, 0.05 equiv), and NaOAc (16.4 mg, 0.2 mmol, 1.0 equiv) and AgSbF<sub>6</sub> (13.7 mg, 0.04 mmol) were taken; then 2 mL (0.1 M) of TFE was added under an Argon atmosphere. Next, the tube was closed with a teflon-lined cap, and gas-degassing using Ar was done for three times before it was kept on stirring in a preheated oil bath at 80 °C. After 24 hours, the reaction was stopped and cooled to room temperature. The reaction mixture was filtered through a short pad of celite and concentrated under a vacuum. The crude reaction mixture was directly purified by column chromatography on silica gel using pet ether/ethyl acetate (19:1) as eluent to obtain (3',3'-dimethyl-3-phenylspiro[indene-1,2'-indolin]-2-yl)(phenyl)methanone (**3a**) (80.4 mg, 94% yellow solid).

#### (Gram scale):

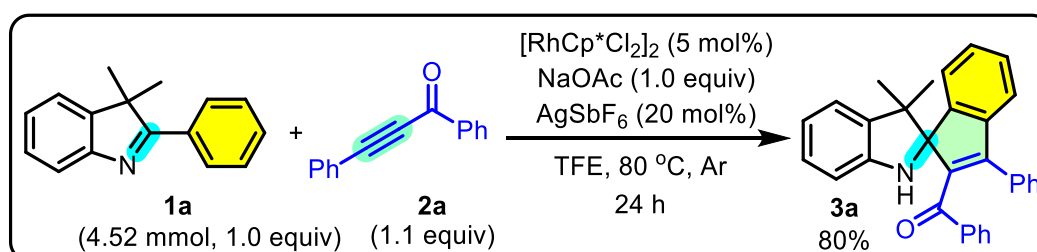

In an oven-dried 25 mL Schlenk tube, 3,3-dimethyl-2-phenyl-3*H*-indole (**1a**) (1 g, 4.52 mmol, 1.0 equiv), 1,3-diphenylprop-2-yn-1-one (**2a**) (1.02 g, 4.97 mmol, 1.1 equiv), [Cp\**Rh*Cl<sub>2</sub>]<sub>2</sub> (140 mg, 0.23 mmol, 0.05 equiv), and NaOAc (371 mg, 4.52 mmol, 1.0 equiv) and, AgSbF<sub>6</sub> (311 mg, 0.9 mmol) were taken; then 20 mL of TFE was added under an Argon atmosphere. Next, the tube was closed with a teflon-lined cap, and gas-degassing using Ar was done three times before it was kept on stirring in a preheated oil bath at 80 °C. After 24 hours, the reaction was stopped and cooled to room temperature. The reaction mixture was filtered through a short pad of celite and concentrated under a vacuum. The crude reaction mixture was directly purified by column chromatography on silica gel using pet ether/ethyl acetate (19:1) as eluent to obtain (3',3'-dimethyl-3-phenylspiro[indene-1,2'-indolin]-2-yl)(phenyl)methanone (**3a**) (1.54 g, 80% yellow solid).

### 3. Mechanistic Experiments:

#### Procedure for H/D Exchange Experiment:

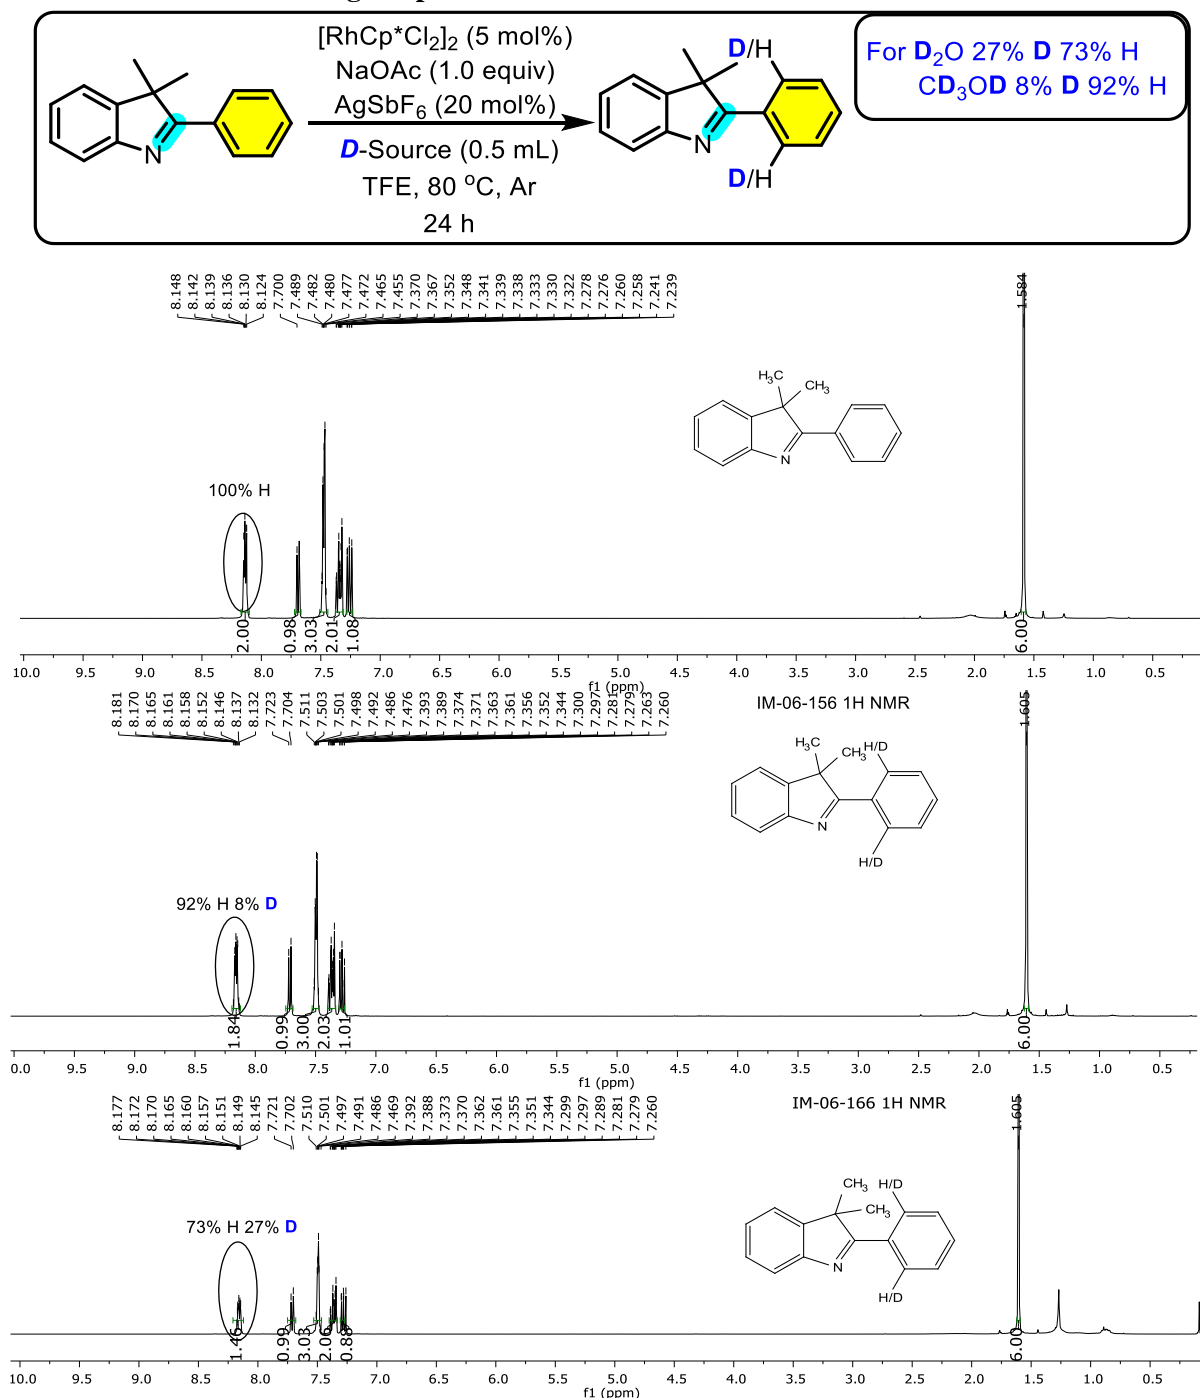

Two oven-dried 10 mL Schlenk tubes were taken, 3,3-dimethyl-2-phenyl-3H-indole (**1a**) (44.2 mg, 0.2 mmol, 1.0 equiv),  $[\text{Cp}^*\text{RhCl}_2]_2$  (6.2 mg, 0.01 mmol, 0.05 equiv), and NaOAc (16.4 mg, 0.2 mmol, 1.0 equiv) and  $\text{AgSbF}_6$  (13.7 mg, 0.04 mmol) were added to both of them; then an excess amount of D-sources ( $\text{CD}_3\text{OD}$  and  $\text{D}_2\text{O}$ ) were added in two different reaction mixture, respectively. Next, 2 mL (0.1 M) of TFE was added under an Argon atmosphere into both reaction mixtures. Subsequently, the tubes were closed with a teflon-lined cap, and gas-degassing using Ar was done for three times before they were kept on stirring in a preheated oil bath at  $80^\circ\text{C}$ . After 24 hours, the reactions were stopped and cooled to room temperature. The reaction mixtures were filtered through a short pad of celite and concentrated under a vacuum. The desired product (**1a-d<sub>n</sub>**) was purified through column

chromatography on silica gel using pet ether/ethyl acetate (49:1) as eluent. The deuterium incorporation was determined by  $^1\text{H}$  NMR spectroscopy for both cases separately as 8% and 27%. The observed difference in deuterium incorporation (27% with  $\text{D}_2\text{O}$  vs 8% with  $\text{CD}_3\text{OD}$ ) likely arises from the combined effects of the different acidities (pKa) of the deuterium sources and the distinct solvation properties of the reaction medium.

## Competitive and Parallel Experiment

### (i) Competitive Experiment between 3,3-dimethyl-2-phenyl-3*H*-indole (**1a**) and 3,3-dimethyl-2-(phenyl-*d*<sub>5</sub>)-3*H*-indole (**1a-d**<sub>5</sub>):

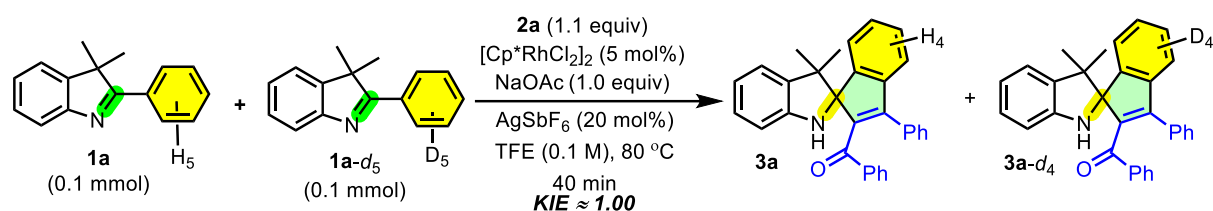

In an oven-dried 10 mL Schlenk tube, 3,3-dimethyl-2-phenyl-3*H*-indole (**1a**) (22.1 mg, 0.1 mmol, 1.0 equiv), 3,3-dimethyl-2-(phenyl-*d*<sub>5</sub>)-3*H*-indole (**1a-d**<sub>5</sub>) (22.6 mg, 0.1 mmol, 1.0 equiv), 1,3-diphenylprop-2-yn-1-one (**2a**) (45.4 mg, 0.22 mmol, 1.1 equiv),  $[\text{Cp}^*\text{RhCl}_2]_2$  (6.2 mg, 0.01 mmol, 0.05 equiv), and NaOAc (16.4 mg, 0.2 mmol, 1.0 equiv) and AgSbF<sub>6</sub> (13.7 mg, 0.04 mmol) were taken, and 2.0 mL of TFE (0.1 M) was added under Ar-atmosphere. Then it was the tube was closed with a teflon-lined cap and gas-degassing was done before it was stirred in a preheated oil bath at 80 °C. After 40 min, the reaction was stopped and quenched in an ice bath. The reaction mixtures were filtered through a short pad of celite and concentrated under vacuo. The crude reaction mixtures were directly purified through column chromatography on silica gel using pet ether/ethyl acetate (19:1) as eluent. The ratio of **3a** and **3a-d**<sub>4</sub> was determined by  $^1\text{H}$  NMR spectroscopy. The primary kinetic isotopic effect was **1.0/1.0**  $\approx$  **1.00**.

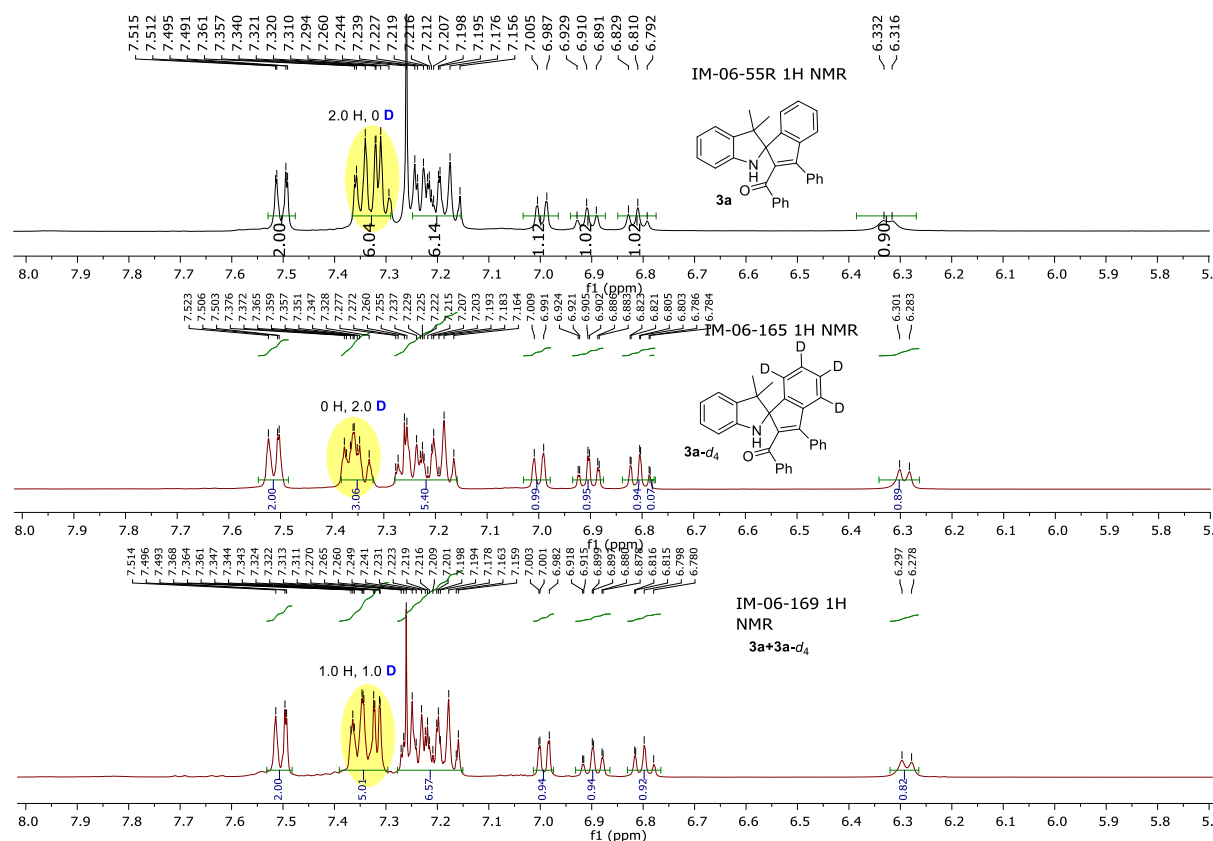

**(ii) Parallel experiment between 1a and 1a-d<sub>5</sub>:**

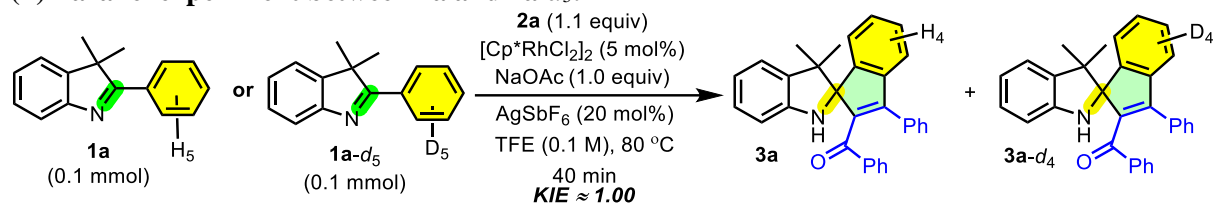

Two separate oven dried 10 mL Schlenk tubes were charged with 3,3-dimethyl-2-phenyl-3*H*-indole (**1a**) (22.1 mg, 0.1 mmol, 1.0 equiv), 3,3-dimethyl-2-(phenyl-*d*<sub>5</sub>)-3*H*-indole (**1a-d<sub>5</sub>**) (22.6 mg, 0.1 mmol, 1.0 equiv), 1,3-diphenylprop-2-yn-1-one (**2a**) (27.8 mg, 0.11 mmol, 1.1 equiv), [Cp<sup>\*</sup>RhCl<sub>2</sub>]<sub>2</sub> (3.1 mg, 0.05 equiv), and NaOAc (8.2 mg, 0.1 mmol, 1.0 equiv) and AgSbF<sub>6</sub> (13.7 mg, 0.02 mmol) were taken, and 1.0 mL of TFE (0.1 M) was added to both of them under Ar-atmosphere. Then it was the tube was closed with a teflon-lined cap and gas-degassing was done before it was stirred in a preheated oil bath at 80 °C. After 40 min the reaction was stopped and quenched in an ice bath. The reaction mixture was filtered through a short pad of celite and concentrated under vacuo. The crude reaction mixture was directly purified through column chromatography on silica gel using pet ether/ethyl acetate (19:1) as eluent. The ratio of **3a** and **3a-d<sub>4</sub>** was determined by <sup>1</sup>H NMR spectroscopy. The primary kinetic isotopic effect was found as  $k_H/k_D = 1.0/1.0 \approx 1.00$ .

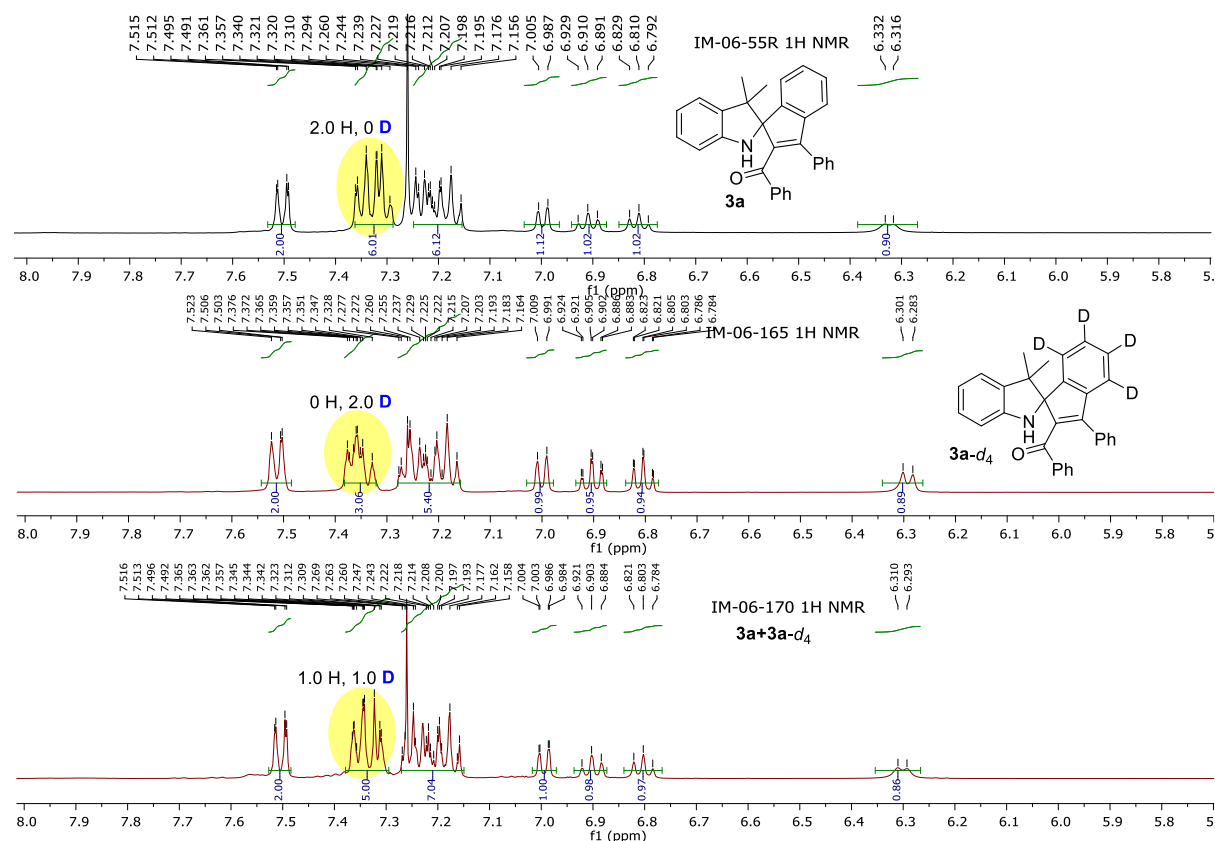

## General Procedure for the Preparation of the Rhodacycle Complex:

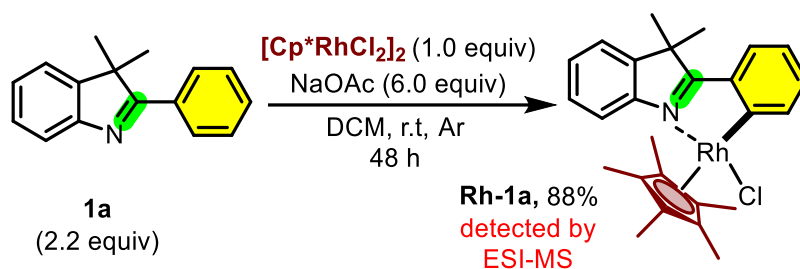

Following an analogous literature procedure,<sup>3</sup> a mixture of  $[\text{Cp}^*\text{RhCl}_2]_2$  (50.0 mg, 0.08 mmol, 1.0 equiv), 3,3-dimethyl-2-phenyl-3*H*-indole (**1a**) (38.9 mg, 0.176 mmol, 2.2 equiv), and NaOAc (39.4 mg, 0.48 mmol, 6.0 equiv) in 10.0 mL of dry DCM was allowed to stir under argon atmosphere at r.t (approximately 36 °C) for 48 h. After completion of the reaction, the reaction mixture was passed through a short pad of celite and concentrated under vacuo, followed by washing with hexane and finally vacuum-dried to give the Rhodacycle compound **Rh-1a** as a reddish-brown solid (40 mg, 88% yield). <sup>1</sup>H NMR (400 MHz, CDCl<sub>3</sub>) δ 7.99-7.96 (m, 1H), 7.72 – 7.63 (comp, 2H), 7.43 – 7.34 (comp, 2H), 7.31-7.26 (m, 1H), 7.25-7.22 (m, 1H), 7.12-7.07 (m, 1H), 1.66 (s, 15H), 1.56 (s, 6H). 149.4, 146.3, 139.8, 139.5, 130.5, 127.8, 127.2, 126.0, 122.4, 121.2, 119.0, 96.3, 25.0, 9.8, 8.3; HRMS (ESI, m/z) calcd for C<sub>26</sub>H<sub>29</sub>NRh [M - Cl]<sup>+</sup> 458.1355, found 458.1362.

## Procedure for the Treatment of the Rhodacycle Complex Rh-1a as Catalyst:

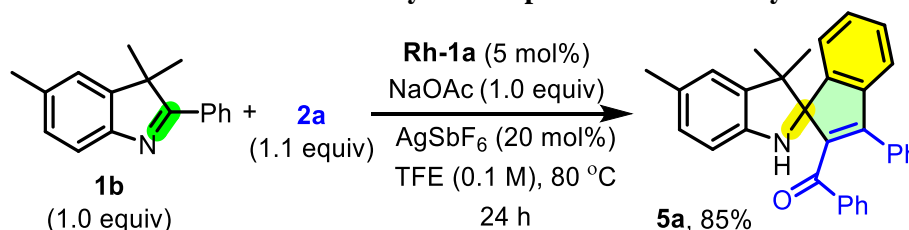

In an oven-dried 10 mL Schlenk tube, 3,3,5-trimethyl-2-phenyl-3*H*-indole (**1b**) (47 mg, 0.2 mmol, 1.0 equiv), 1,3-diphenylprop-2-yn-1-one (**2a**) (45.4 mg, 0.22 mmol, 1.1 equiv), **Rh-1a** (10 mg, 0.01 mmol, 0.05 equiv), and NaOAc (16.4 mg, 0.2 mmol, 1.0 equiv) and AgSbF<sub>6</sub> (13.7 mg, 0.04 mmol) were taken; then 20 mL of TFE was added under an Argon atmosphere. Next, the tube was closed with a teflon-lined cap, and gas-degassing using Ar was done for three times before it was kept on stirring in a preheated oil bath at 80 °C. After 24 hours, the reaction was stopped and cooled to room temperature. The reaction mixture was filtered through a short pad of celite and concentrated under a vacuum. The crude reaction mixture was directly purified by column chromatography on silica gel using pet ether/ethyl acetate (19:1) as eluent to obtain phenyl(3',3',5'-trimethyl-3-phenylspiro[indene-1,2'-indolin]-2-yl)methanone (**5a**) (75 mg, 85% yellow solid).

## Procedure for the Treatment of the Rhodacycle Complex Rh-1a as a Substrate:

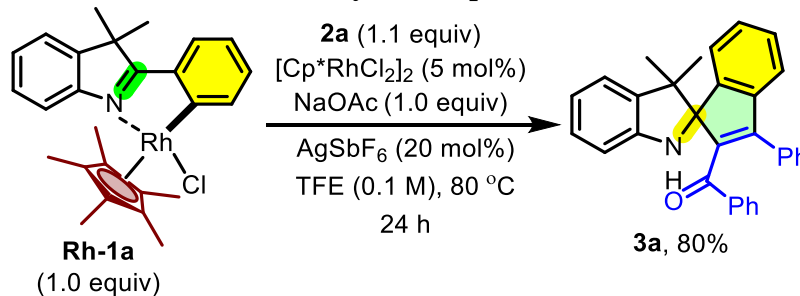

In an oven-dried 10 mL Schlenk tube, **Rh-1a** (100 mg, 0.2 mmol, 1.0 equiv), 1,3-diphenylprop-2-yn-1-one (**2a**) (45.4 mg, 0.22 mmol, 1.1 equiv),  $[\text{Cp}^*\text{RhCl}_2]_2$  (6.2 mg, 0.01 mmol, 0.05 equiv), and NaOAc (16.4 mg, 0.2 mmol, 1.0 equiv) and AgSbF<sub>6</sub> (13.7 mg, 0.04 mmol) were taken, and 2.0 mL of TFE (0.1

M) was added under Ar-atmosphere. Next, the tube was closed with a teflon-lined cap, and gas-degassing using Ar was done for three times before it was kept on stirring in a preheated oil bath at 80 °C. After 24 hours, the reaction was stopped and cooled to room temperature. The reaction mixture was filtered through a short pad of celite and concentrated under a vacuum. The crude reaction mixture was directly purified by column chromatography on silica gel using pet ether/ethyl acetate (19:1) as eluent to obtain (3',3'-dimethyl-3-phenylspiro[indene-1,2'-indolin]-2-yl)(phenyl)methanone (**3a**) (68.4 mg, 80% yellow solid).

#### References:

1. J. Gao, K. Luo, X. Wei, H. Wang, H. Liu and Y. Zhou, *Org. Lett.*, 2023, **25**, 3341-3346.
2. K. Naskar, S. Karmakar, I. Mondal, W. Sarkar, S. Roy, A. Roy and I. Deb, *Chem. Commun.*, 2023, **59**, 7751-7754.
3. K. Naskar, I. Mondal, S. Das, N. S. Bliss, M. Saha, S. Dhar and I. Deb, *Org. Lett.*, 2025, **27**, 9619-9624.
4. W. Sarkar, K. Naskar, S. Roy, I. Mondal, S. Karmakar, A. Mishra and I. Deb, *J. Org. Chem.*, 2022, **87**, 9988-10002.

**Table S1. Additional Optimization of Reaction Conditions<sup>a</sup>**

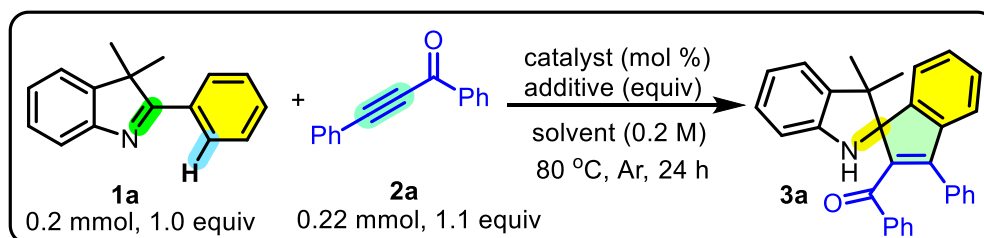

| Entry | [Cp*RhCl <sub>2</sub> ] <sub>2</sub><br>(mol %) | Additives<br>(equiv)                           | Temp<br>(°C) | Time<br>(h) | Yield (%)<br>of <b>3a</b> <sup>b</sup> |
|-------|-------------------------------------------------|------------------------------------------------|--------------|-------------|----------------------------------------|
| 1     | 3                                               | NaOAc (1.0 equiv)                              | 80           | 24          | 68                                     |
| 2     | 5                                               | NaOAc (1.0 equiv)                              | 60           | 24          | 70                                     |
| 3     | 5                                               | KOAc (1.0 equiv)                               | 80           | 24          | 80                                     |
| 4     | 5                                               | NaOPiv (1.0 equiv)                             | 80           | 24          | 70                                     |
| 5     | 5                                               | Zn(OAc) <sub>2</sub> (1.0 equiv)               | 80           | 24          | 88                                     |
| 6     | 5                                               | PivOH (1.0 equiv)                              | 80           | 24          | 60                                     |
| 7     | 5                                               | Cu(OAc) <sub>2</sub> (1.0 equiv)               | 80           | 24          | 75                                     |
| 8     | 5                                               | NaOAc (1.0 equiv) + AgNTf <sub>2</sub><br>(20) | 80           | 24          | 85                                     |

<sup>a</sup>Reaction conditions: **1a** (1.0 equiv, 0.2 mmol), **2a** (1.1 equiv), [Cp\*RhCl<sub>2</sub>]<sub>2</sub> (mol %), NaOAc (equiv), AgSbF<sub>6</sub> (mol%), 2.0 mL TFE (0.1 M), under Ar. <sup>b</sup>Isolated yield. TFE = 2,2,2-trifluoroethanol.

**Table S2. Unsuccessful Substrates**

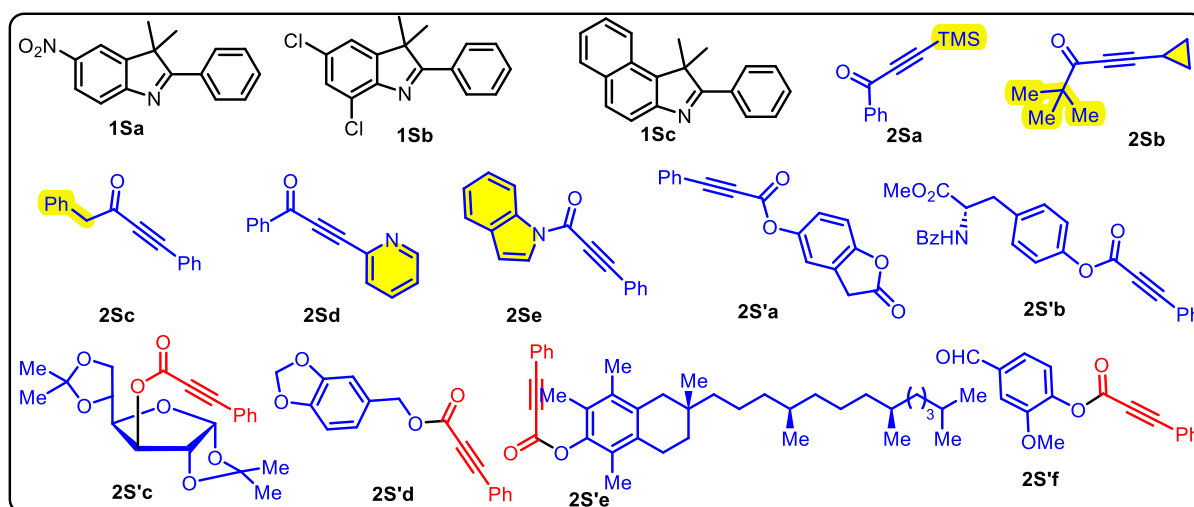

Nitro, di-chloro-substituted indolin and a naphthalene fused DG did not work under the current reaction conditions; in all cases the starting materials were unreacted. For the TMS and cyclopropane containing substrates, several new spots formed, however could not be characterized from complex mixtures. Benzyl, pyridine and indole containing ynone were left unreacted and failed to furnish the desired products. For the other natural product derived ynoates (2s'a-2s'f), no desired spiro-cyclized products were afforded; in some cases, complex mixtures found which could not be characterized. For all the substrates, we investigated the reactivity using various additives and further optimized the reaction conditions (changing time and temperature parameters); however, none of these attempts were successful.

The characterization data for all the products is given below

**(3',3'-dimethyl-3-phenylspiro[indene-1,2'-indolin]-2-yl)(phenyl)methanone (3a):**

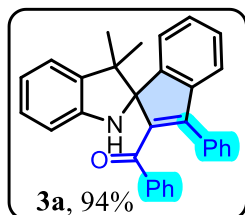

**Yield** 94% (80.3 mg); **Yellow solid**; **eluent composition** petroleum ether/ethyl acetate = 19:1; **mp** 154–56 °C; Crystallization was done from hot ethanol; **<sup>1</sup>H NMR (400 MHz, CDCl<sub>3</sub>)** δ 7.52–7.49 (comp, 2H), 7.38–7.28 (comp, 6H), 7.25–7.13 (comp, 6H), 7.01–6.97 (m, 1H), 6.92–6.89 (m, 1H), 6.82–6.78 (m, 1H), 6.33–6.31 (m, 1H), 1.34 (s, 3H), 1.26 (s, 3H); **<sup>13</sup>C{<sup>1</sup>H} NMR (101 MHz, CDCl<sub>3</sub>)** δ 196.2, 148.2, 146.6, 146.5, 144.2, 141.7, 139.6, 137.9, 133.2, 132.4, 128.8 (X2), 128.4, 128.3 (X2), 127.9, 127.4, 127.0, 124.4, 121.9, 121.8, 119.8, 111.1, 86.7, 49.4, 26.1, 24.8; **HRMS (ESI, m/z)** calcd for C<sub>31</sub>H<sub>26</sub>NO [M + H]<sup>+</sup> 428.2014, found 428.2003.

**Figure S1.** X-ray crystal structure of **3a** (ellipsoid contour at 50% probability level)

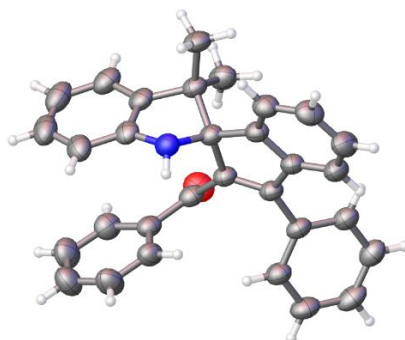

**Crystal data and structure refinement for 3a (CCDC 2534747)**

|                       |                                    |                                             |                                                               |
|-----------------------|------------------------------------|---------------------------------------------|---------------------------------------------------------------|
| Identification code   | IBD_IM_06_168_0m_a                 | $\rho_{\text{calc}}/\text{g}/\text{cm}^3$   | 1.256                                                         |
| Empirical formula     | C <sub>31</sub> H <sub>25</sub> NO | $\mu/\text{mm}^{-1}$                        | 0.580                                                         |
| Formula weight        | 427.52                             | F(000)                                      | 904.0                                                         |
| Temperature/K         | 297.00                             | Crystal size/mm <sup>3</sup>                | 0.32 × 0.23 × 0.19                                            |
| Crystal system        | monoclinic                         | Radiation                                   | Cu K $\alpha$ ( $\lambda = 1.54178$ )                         |
| Space group           | P2 <sub>1</sub> /n                 | 2 $\Theta$ range for data collection/°      | 8.872 to 136.522                                              |
| a/Å                   | 10.3386(16)                        | Index ranges                                | -12 ≤ h ≤ 12, -22 ≤ k ≤ 22, -14 ≤ l ≤ 14                      |
| b/Å                   | 18.480(3)                          | Reflections collected                       | 43667                                                         |
| c/Å                   | 11.8838(17)                        | Independent reflections                     | 4073 [R <sub>int</sub> = 0.0526, R <sub>sigma</sub> = 0.0263] |
| $\alpha$ /°           | 90                                 | Data/restraints/parameters                  | 4073/0/301                                                    |
| $\beta$ /°            | 95.167(5)                          | Goodness-of-fit on F <sup>2</sup>           | 1.086                                                         |
| $\gamma$ /°           | 90                                 | Final R indexes [I ≥ 2 $\sigma$ (I)]        | R <sub>1</sub> = 0.0554, wR <sub>2</sub> = 0.1465             |
| Volume/Å <sup>3</sup> | 2261.3(6)                          | Final R indexes [all data]                  | R <sub>1</sub> = 0.0563, wR <sub>2</sub> = 0.1475             |
| Z                     | 4                                  | Largest diff. peak/hole / e Å <sup>-3</sup> | 0.23/-0.22                                                    |

**(3-(4-ethylphenyl)-3',3'-dimethylspiro[indene-1,2'-indolin]-2-yl)(phenyl)methanone (3b):**

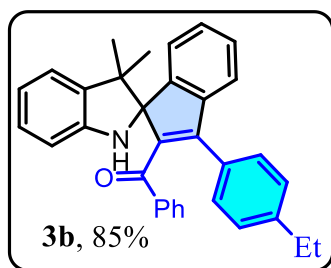

**Yield** 85% (77.3 mg); Yellow solid; **eluent composition** petroleum ether/ethyl acetate = 19:1; **mp** 163-165 °C; **<sup>1</sup>H NMR (400 MHz, CDCl<sub>3</sub>)** δ 7.52–7.47 (comp, 2H), 7.37–7.30 (comp, 4H), 7.30–7.25 (comp, 2H), 7.24–7.21 (m, 1H), 7.19–7.15 (comp, 2H), 7.07 (app d, *J* = 8.0 Hz, 2H), 6.99 (app d, *J* = 7.2 Hz, 1H), 6.89 (app td, *J* = 7.6, 1.0 Hz, 1H), 6.82–6.77 (m, 1H), 6.26 (app d, *J* = 7.6, 1H), 4.49 (br s, 1 N-H), 2.56 (q, *J* = 7.6 Hz, 2H), 1.35 (s, 3H), 1.26 (s, 3H), 1.15 (t, *J* = 7.6 Hz, 3H); **<sup>13</sup>C{<sup>1</sup>H} NMR (101 MHz, CDCl<sub>3</sub>)** δ 196.4, 148.3, 146.5, 144.4, 143.9, 141.9, 139.7, 138.1, 132.3, 130.4, 128.8, 128.3 (X2), 127.9, 127.8, 127.4, 126.9, 124.4, 122.0, 121.8, 119.8, 111.1, 86.6, 49.4, 28.6, 26.2, 24.7, 15.3; **HRMS (ESI, m/z)** calcd for C<sub>33</sub>H<sub>30</sub>NO [M + H]<sup>+</sup> 456.2317, found 456.2314.

**(3',3'-dimethyl-3-(4-propylphenyl)spiro[indene-1,2'-indolin]-2-yl)(phenyl)methanone (3c):**

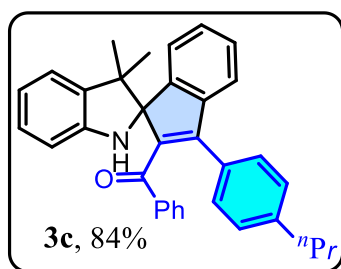

**Yield** 84% (79 mg); Yellow solid; **eluent composition** petroleum ether/ethyl acetate = 19:1; **mp** 160-162 °C; **<sup>1</sup>H NMR (400 MHz, CDCl<sub>3</sub>)** δ 7.54–7.49 (comp, 2H), 7.37–7.28 (comp, 4H), 7.28–7.24 (comp, 2H), 7.23–7.14 (comp, 3H), 7.06-7.03 (comp, 2H), 7.02–6.98 (m, 1H), 6.92 (app td, *J* = 7.6, 1.3 Hz, 1H), 6.80 (app td, *J* = 7.4, 0.9 Hz, 1H), 6.32 (app d, *J* = 7.6 Hz, 1H), 4.55 (br s, 1NH), 2.50 (t, *J* = 7.6 Hz, 2H), 1.65–1.48 (m, 2H), 1.35 (s, 3H), 1.26 (s, 3H), 0.85 (t, *J* = 7.3 Hz, 3H) **<sup>13</sup>C{<sup>1</sup>H} NMR (101 MHz, CDCl<sub>3</sub>)** δ 196.4, 148.3, 147.0, 146.9, 143.5, 142.9, 141.7, 139.8, 138.0, 132.3, 130.5, 128.9, 128.7, 128.4, 128.3, 127.8, 127.4, 127.0, 124.2, 122.0, 121.8, 119.8, 111.2, 86.5, 49.5, 37.7, 26.0, 25.1, 24.2, 13.6; **HRMS (ESI, m/z)** calcd for C<sub>34</sub>H<sub>31</sub>NO [M]<sup>+</sup> 469.2406, found 469.2411.

**(3-(4-ethoxyphenyl)-3',3'-dimethylspiro[indene-1,2'-indolin]-2-yl)(phenyl)methanone (3d):**

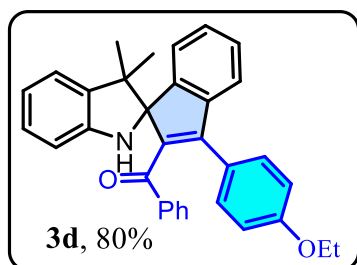

**Yield** 80% (75.5 mg); Yellow solid; **eluent composition** petroleum ether/ethyl acetate = 19:1; **mp** 176-178 °C; **<sup>1</sup>H NMR (400 MHz, CDCl<sub>3</sub>)** δ 7.56–7.49 (comp, 2H), 7.39–7.25 (comp, 6H), 7.24–7.15 (comp, 3H), 7.03–6.97 (m, 1H), 6.90 (app td, *J* = 7.6, 1.2 Hz, 1H), 6.83–6.73 (comp, 3H), 6.29 (app d, *J* = 7.6, 1H), 4.47 (br s, 1N-H), 3.95 (q, *J* = 7.0 Hz, 2H), 1.41–1.31 (m, 6H), 1.26 (s, 3H); **<sup>13</sup>C{<sup>1</sup>H} NMR (101 MHz, CDCl<sub>3</sub>)** δ 196.5, 158.9, 148.3, 146.8, 146.2, 143.3, 141.9, 139.7, 138.0, 132.4, 130.1, 128.9, 128.3, 127.9, 127.4, 126.9, 125.4, 124.3, 121.9, 121.8, 119.8, 114.3, 111.1, 86.5, 63.3, 49.4, 26.0, 24.9, 14.7; **HRMS (ESI, m/z)** calcd for C<sub>33</sub>H<sub>30</sub>NO<sub>2</sub> [M + H]<sup>+</sup> 472.2277, found 472.2274.

**(3-(4-fluorophenyl)-3',3'-dimethylspiro[indene-1,2'-indolin]-2-yl)(phenyl)methanone (3e):**

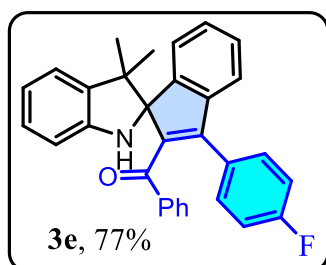

**Yield** 77% (68.5 mg); Yellow solid; **eluent composition** petroleum ether/ethyl acetate = 19:1; **mp** 165-167 °C; **<sup>1</sup>H NMR (400 MHz, CDCl<sub>3</sub>)** δ 7.51–7.45 (comp, 2H), 7.41–7.31 (comp, 5H), 7.30–7.25 (m, 1H and CDCl<sub>3</sub> peak), 7.24–7.17 (comp, 3H), 7.02–6.92 (m, 3H), 6.88 (app td, *J* = 7.6, 1.3 Hz, 1H), 6.82–6.77 (m, 1H), 6.24 (app d, *J* = 7.6 Hz, 1H), 4.38 (br s, 1 N-H), 1.35 (s, 3H), 1.27 (s, 3H); **<sup>13</sup>C{<sup>1</sup>H} NMR (101 MHz, CDCl<sub>3</sub>)** δ 196.1, 163.8, 161.3, 148.1, 146.3, 145.54 (d, *J* = 45.4 Hz), 141.6, 139.5, 137.9, 132.6, 130.65 (d, *J* = 8.2 Hz), 129.27–129.11 (m),

128.7, 128.5, 128.0, 127.4, 127.2, 124.5, 121.8, 121.7, 119.9, 115.5, 115.3, 111.1, 86.8, 49.4, 26.2, 24.50; **<sup>19</sup>F NMR (376 MHz, CDCl<sub>3</sub>)** -112.5; **HRMS (ESI, m/z)** calcd for C<sub>31</sub>H<sub>25</sub>NOF [M + H]<sup>+</sup> 446.1920, found 446.1906.

**methyl 4-(2-benzoyl-3',3'-dimethylspiro[indene-1,2'-indolin]-3-yl)benzoate (3f):**

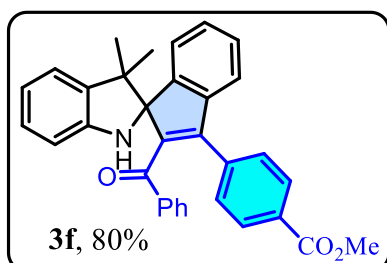

**Yield** 80% (71.2 mg); Yellow solid; **eluent composition** petroleum ether/ethyl acetate = 19:1; **mp** 181-183 °C; **<sup>1</sup>H NMR (400 MHz, CDCl<sub>3</sub>)** δ 7.97–7.90 (comp, 2H), 7.49-7.42 (comp, 4H), 7.40–7.31 (comp, 3H), 7.29–7.26 (comp, 2H), 7.21–7.17 (comp, 2H), 7.02–6.96 (m, 1H), 6.87 (app td, *J* = 7.6, 1.3 Hz, 1H), 6.81–6.75 (m, 1H), 6.21 (d, *J* = 7.6 Hz, 1H), 4.46 (br s, 1N-H), 3.87 (s, 3H), 1.36 (s, 3H), 1.26 (s, 3H); **<sup>13</sup>C NMR (101 MHz, CDCl<sub>3</sub>)** δ 195.8, 166.5, 148.0, 146.1, 145.9, 145.1, 141.3, 139.4, 137.9,

137.8, 132.7, 129.8, 129.6, 128.8, 128.7, 128.6, 128.1, 127.5, 127.2, 124.7, 121.8, 121.7, 119.9, 111.0, 87.0, 52.1, 49.5, 26.4, 24.2; **HRMS (ESI, m/z)** calcd for C<sub>33</sub>H<sub>28</sub>NO<sub>3</sub> [M + H]<sup>+</sup> 486.2069, found 486.2060.

**(3',3'-dimethyl-3-(m-tolyl)spiro[indene-1,2'-indolin]-2-yl)(phenyl)methanone (3g):**

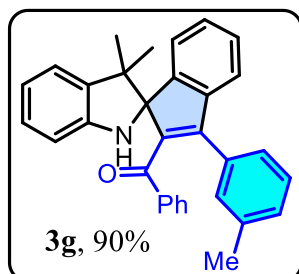

**Yield** 90% (79.4 mg); Yellow solid; **eluent composition** petroleum ether/ethyl acetate = 19:1; **mp** 74-76 °C; **<sup>1</sup>H NMR (400 MHz, CDCl<sub>3</sub>)** δ 7.54–7.47 (comp, 2H), 7.37–7.28 (comp, 4H), 7.24–7.10 (comp, 6H), 7.03–6.96 (comp, 2H), 6.90 (app td, *J* = 7.6, 1.2 Hz, 1H), 6.83–6.76 (m, 1H), 6.30 (app d, *J* = 7.7 Hz, 1H), 4.49 (br s, 1N-H), 2.24 (s, 3H), 1.35 (s, 3H), 1.26 (s, 3H); **<sup>13</sup>C NMR (101 MHz, CDCl<sub>3</sub>)** δ 196.3, 148.3, 146.9, 146.8, 143.8, 141.7, 139.7, 138.0, 137.9, 133.1, 132.8, 129.6, 129.1, 128.8, 128.3, 128.2, 127.8, 127.4, 127.0, 125.8, 124.3, 122.0, 121.8, 119.8, 111.2, 86.6, 49.5, 26.0, 25.0, 21.3; **HRMS (ESI, m/z)** calcd for C<sub>32</sub>H<sub>28</sub>NO [M + H]<sup>+</sup>

442.2171, found 442.2187.

**(3',3'-dimethyl-3-(phenanthren-9-yl)spiro[indene-1,2'-indolin]-2-yl)(phenyl)methanone (3h) and (3',3'-dimethyl-2-(phenanthren-9-yl)spiro[indene-1,2'-indolin]-3-yl)(phenyl)methanone (3h')**:

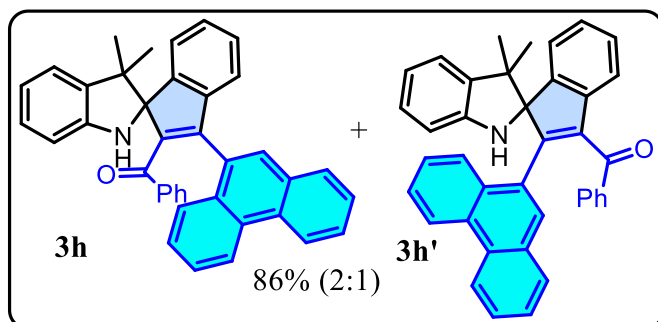

**Combined Yield** 86% (91 mg); Yellow solid; **eluent composition** petroleum ether/ethyl acetate = 19:1; **mp** 173-175 °C; Crystallization was done from hot ethanol; **<sup>1</sup>H NMR (400 MHz, CDCl<sub>3</sub>)** δ 8.71–8.63 (m, 1.08H), 8.58 (comp, 2H), 8.07 (d, *J* = 7.9 Hz, 1H), 7.93–7.88 (m, 0.48H), 7.88–7.83 (m, 0.90H), 7.72–7.66 (m, 1.21H), 7.67–7.54 (comp, 7H), 7.53–7.43 (comp, 3.17H), 7.36–7.31 (m, 1H), 7.29–

7.19 (comp, 3.69H), 7.18–7.09 (comp, 2.57H), 7.09–6.99 (comp, 4.44H), 6.93 (t, *J* = 7.8 Hz, 1H), 6.90–

6.80 (comp, 5.34H), 6.66–6.63 (m, 1H), 6.30–6.20 (m, 0.30H), 4.99 (br s, 0.71 NH), 4.67 (br s, 0.19 NH), 1.54 (s, 1.42H), 1.43 (s, 3.14H), 1.42 (s, 3H), 1.37 (s, 1.36H);  $^{13}\text{C}$  NMR (101 MHz,  $\text{CDCl}_3$ )  $\delta$  196.2, 196.0, 148.9, 148.7, 148.3, 148.0, 146.0, 145.5, 144.9, 142.8, 142.2, 139.9, 139.8, 138.1, 137.8, 131.1, 131.0, 130.5, 130.32, 130.28, 130.21, 130.18, 129.4, 129.2, 128.9, 128.6, 128.5, 128.4, 128.3, 127.7, 127.6, 127.51, 127.46, 127.4, 127.2, 127.1, 127.0, 126.8, 126.7, 126.63, 126.57, 126.5, 126.4, 124.5, 123.6, 123.1, 123.0, 122.8, 122.6, 122.3, 121.9, 121.9, 120.1, 119.9, 111.8, 111.3, 86.9, 86.7, 49.8, 27.5, 26.6, 24.7, 24.3; HRMS (ESI, m/z) calcd for  $\text{C}_{39}\text{H}_{30}\text{NO}$   $[\text{M} + \text{H}]^+$  528.2329 found 528.2327.

**Figure S2.** X-ray crystal structure of **3h** (ellipsoid contour at 50% probability level)

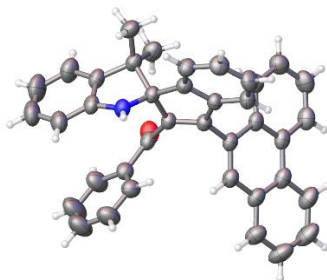

**Crystal data and structure refinement for 3h (CCDC 2552131)**

|                      |                                       |                                               |                                                                  |
|----------------------|---------------------------------------|-----------------------------------------------|------------------------------------------------------------------|
| Identification code  | IM_06_113N_0m_a                       | $\rho_{\text{calc}}/\text{cm}^3$              | 1.195                                                            |
| Empirical formula    | $\text{C}_{39}\text{H}_{29}\text{NO}$ | $\mu/\text{mm}^{-1}$                          | 0.546                                                            |
| Formula weight       | 527.671                               | F(000)                                        | 557.7                                                            |
| Temperature/K        | 294.00                                | Crystal size/ $\text{mm}^3$                   | $0.16 \times 0.14 \times 0.09$                                   |
| Crystal system       | triclinic                             | Radiation                                     | Cu $\text{K}\alpha$ ( $\lambda = 1.54178$ )                      |
| Space group          | P-1                                   | $2\theta$ range for data collection/ $^\circ$ | 6.52 to 133.3                                                    |
| a/ $\text{Å}$        | 10.3817(2)                            | Index ranges                                  | $-12 \leq h \leq 12, -13 \leq k \leq 12, -17 \leq l \leq 17$     |
| b/ $\text{Å}$        | 11.3734(2)                            | Reflections collected                         | 31540                                                            |
| c/ $\text{Å}$        | 14.3921(3)                            | Independent reflections                       | 5182 [ $R_{\text{int}} = 0.0492$ , $R_{\text{sigma}} = 0.0331$ ] |
| $\alpha/^\circ$      | 92.141(1)                             | Data/restraints/parameters                    | 5182/0/373                                                       |
| $\beta/^\circ$       | 106.885(1)                            | Goodness-of-fit on $F^2$                      | 1.055                                                            |
| $\gamma/^\circ$      | 113.637(1)                            | Final R indexes [ $I \geq 2\sigma(I)$ ]       | $R_1 = 0.0515, wR_2 = 0.1413$                                    |
| Volume/ $\text{Å}^3$ | 1466.56(5)                            | Final R indexes [all data]                    | $R_1 = 0.0555, wR_2 = 0.1462$                                    |
| Z                    | 2                                     | Largest diff. peak/hole / $e \text{ Å}^{-3}$  | 0.47/-0.37                                                       |

**(3',3'-dimethyl-3-phenylspiro[indene-1,2'-indolin]-2-yl)(4-fluorophenyl)methanone (3i):**

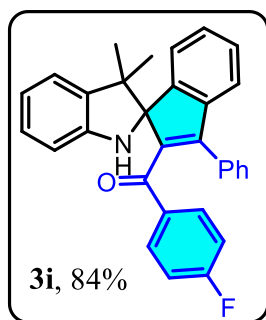

**Yield** 84% (75 mg); Yellow solid; **eluent composition** petroleum ether/ethyl acetate = 19:1; **mp** 176–178  $^\circ\text{C}$ ;  $^1\text{H}$  NMR (400 MHz,  $\text{CDCl}_3$ )  $\delta$  7.58–7.51 (comp, 2H), 7.37–7.30 (comp, 5H), 7.30–7.20 (m, 4H), 7.04–6.98 (m, 1H), 6.94 (td,  $J = 7.6, 1.3$  Hz, 1H), 6.89–6.78 (comp, 3H), 6.37 (d,  $J = 7.7$  Hz, 1H), 4.47 (br s, 1NH), 1.34 (s, 3H), 1.27 (s, 3H);  $^{13}\text{C}$  NMR (101 MHz,  $\text{CDCl}_3$ )  $\delta$  194.5, 166.5, 163.9, 148.3, 146.77 (d,  $J = 4.5$  Hz), 143.7, 141.5, 139.6, 134.30 (d,  $J = 2.6$  Hz), 133.1, 131.51–131.27 (m), 128.7, 128.5, 128.4 (X2), 127.4, 127.2, 124.3, 121.91 (d,  $J = 12.2$  Hz), 119.8, 115.1, 114.9, 111.0, 86.7, 49.4, 25.9, 25.0;  $^{19}\text{F}$  NMR (376 MHz,  $\text{CDCl}_3$ )  $\delta$  -105.7; HRMS (ESI, m/z) calcd for  $\text{C}_{31}\text{H}_{25}\text{FNO}$   $[\text{M} + \text{H}]^+$  446.1906 found 446.1920.

**(3',3'-dimethyl-3-phenylspiro[indene-1,2'-indolin]-2-yl)(4-nitrophenyl)methanone (3j):**

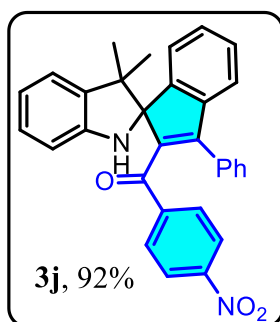

**Yield** 92% (87 mg); Yellow solid; **eluent composition** petroleum ether/ethyl acetate = 19:1; **mp** 197-199 °C; **<sup>1</sup>H NMR (400 MHz, CDCl<sub>3</sub>)** δ 8.04–7.97 (comp, 2H), 7.66–7.59 (comp, 2H), 7.36–7.29 (comp, 5H), 7.28–7.21 (comp, 4H), 7.04–6.98 (m, 1H), 6.97–6.90(m, 1H), 6.86–6.77 (m, 1H), 6,37 (d, *J* = 7.6 Hz, 1H), 4.45 (br s, 1 NH), 1.31 (s, 3H), 1.26 (s, 3H); **<sup>13</sup>C NMR (101 MHz, CDCl<sub>3</sub>)** δ 194.3, 149.5, 148.9, 148.2, 146.8, 143.0, 142.6, 141.1, 139.3, 132.8, 129.6, 128.9, 128.8, 128.64, 128.57, 127.8, 127.7, 124.4, 123.1, 122.4, 122.0, 119.9, 110.9, 86.8, 49.6, 26.1, 25.2; **HRMS (ESI, m/z)** calcd for C<sub>31</sub>H<sub>25</sub>N<sub>2</sub>O<sub>3</sub> [M + H]<sup>+</sup> 473.1865 found 473.1853.

**(3-chlorophenyl)(3',3'-dimethyl-3-phenylspiro[indene-1,2'-indolin]-2-yl)methanone (3k):**

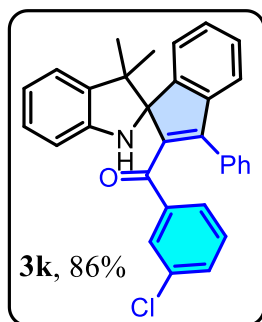

**Yield** 86% (80 mg); Yellow solid; **eluent composition** petroleum ether/ethyl acetate = 19:1; **mp** 163-165 °C; **<sup>1</sup>H NMR (400 MHz, CDCl<sub>3</sub>)** δ 7.44–17.37 (comp, 2H), 7.36–7.21 (comp, 10H), 7.11 (t, *J* = 7.8 Hz, 1H), 7.02–6.98 (m, 1H), 6.94 (td, *J* = 7.6, 1.2 Hz, 1H), 6.81 (td, *J* = 7.4, 0.8 Hz, 1H), 6.45–6.23 (m, 1H), 4.45 (br s, 1 NH), 1.33 (s, 3H), 1.27 (s, 3H); **<sup>13</sup>C NMR (101 MHz, CDCl<sub>3</sub>)** δ 194.7, 148.3, 147.7, 146.6, 143.5, 141.4, 139.6, 139.4, 134.2, 133.0, 132.2, 129.2, 128.8, 128.7, 128.6, 128.5, 128.4, 127.5, 127.4, 126.8, 124.4, 122.1, 121.9, 119.9, 111.0, 86.8, 49.5, 26.1, 24.9; **HRMS (ESI, m/z)** calcd for C<sub>31</sub>H<sub>25</sub>NOCl [M + H]<sup>+</sup> 462.1625 found 462.1628

**(3',3'-dimethyl-3-phenylspiro[indene-1,2'-indolin]-2-yl)(3-(trifluoromethyl)phenyl)methanone (3l):**

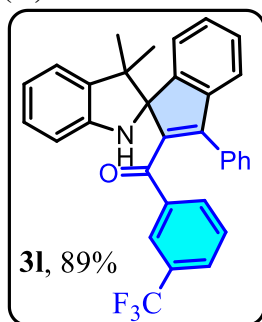

**Yield** 89% (88 mg); Yellow solid; **eluent composition** petroleum ether/ethyl acetate = 19:1; **mp** 148-150 °C; Crystallization was done from hot ethanol; **<sup>1</sup>H NMR (400 MHz, CDCl<sub>3</sub>)** δ 7.75–7.67 (comp, 2H), 7.57 (d, *J* = 7.8 Hz, 1H), 7.36–7.29 (comp, 6H), 7.28–7.17 (comp, 4H), 7.00 (d, *J* = 7.3 Hz, 1H), 6.93 (td, *J* = 7.6, 1.0 Hz, 1H), 6.83-6.78 (m, 1H), 6.35 (d, *J* = 7.7 Hz, 4H), 4.46 (br s, 1 NH), 1.32 (s, 3H), 1.27 (s, 3H).; **<sup>13</sup>C NMR (101 MHz, CDCl<sub>3</sub>)** δ 194.7, 148.4 (d, *J* = 11.8 Hz), 146.8, 143.1, 141.3, 139.4, 138.5, 132.9, 131.6, 130.45 (d, *J* = 32.8 Hz), 128.8 (X2), 128.6, 128.52, 128.47 (X2), 127.61 (d, *J* = 7.1 Hz), 125.84 (d, *J* = 3.7 Hz), 124.9, 124.4, 123.52 (d, *J* = 271.6 Hz), 122.2, 121.9, 119.8, 110.9, 86.8, 49.5, 26.0, 25.2; **<sup>19</sup>F NMR (376 MHz, CDCl<sub>3</sub>)** δ -62.8; **HRMS (ESI, m/z)** calcd for C<sub>32</sub>H<sub>25</sub>F<sub>3</sub>NO [M + H]<sup>+</sup> 496.1888 found 496.1879.

**Figure S3.** X-ray crystal structure of **3l** (ellipsoid contour at 50% probability level)

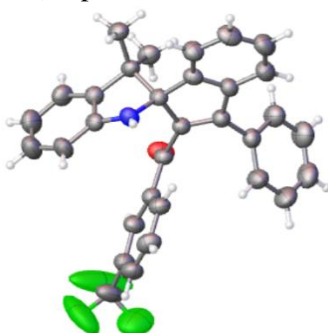

**Crystal data and structure refinement for 3l (CCDC 2534748)**

|                      |                                                   |                                                |                                                                |
|----------------------|---------------------------------------------------|------------------------------------------------|----------------------------------------------------------------|
| Identification code  | IM_06_108ree_0ma_a                                | $\rho_{\text{calc}}/\text{cm}^3$               | 1.305                                                          |
| Empirical formula    | C <sub>32</sub> H <sub>24</sub> F <sub>3</sub> NO | $\mu/\text{mm}^{-1}$                           | 0.771                                                          |
| Formula weight       | 495.52                                            | F(000)                                         | 1032.0                                                         |
| Temperature/K        | 299.00                                            | Crystal size/mm <sup>3</sup>                   | 0.12 × 0.09 × 0.05                                             |
| Crystal system       | orthorhombic                                      | Radiation                                      | Cu K $\alpha$ ( $\lambda$ = 1.54178)                           |
| Space group          | Pca2 <sub>1</sub>                                 | 2 $\Theta$ range for data collection/ $^\circ$ | 7.28 to 133.636                                                |
| a/ $\text{Å}$        | 24.2871(14)                                       | Index ranges                                   | -28 ≤ h ≤ 28, -7 ≤ k ≤ 7, -19 ≤ l ≤ 19                         |
| b/ $\text{Å}$        | 6.3963(4)                                         | Reflections collected                          | 55048                                                          |
| c/ $\text{Å}$        | 16.2325(10)                                       | Independent reflections                        | 4450 [ $R_{\text{int}}$ = 0.0710, $R_{\text{sigma}}$ = 0.0372] |
| $\alpha/^\circ$      | 90                                                | Data/restraints/parameters                     | 4450/1/336                                                     |
| $\beta/^\circ$       | 90                                                | Goodness-of-fit on F <sup>2</sup>              | 1.050                                                          |
| $\gamma/^\circ$      | 90                                                | Final R indexes [ $I \geq 2\sigma(I)$ ]        | $R_1$ = 0.0607, $wR_2$ = 0.1626                                |
| Volume/ $\text{Å}^3$ | 2521.7(3)                                         | Final R indexes [all data]                     | $R_1$ = 0.0618, $wR_2$ = 0.1641                                |
| Z                    | 4                                                 | Largest diff. peak/hole / e $\text{Å}^{-3}$    | 0.58/-0.39                                                     |

**(3',3'-dimethyl-3-phenylspiro[indene-1,2'-indolin]-2-yl)(4-fluoro-3-methylphenyl)methanone (3m):**

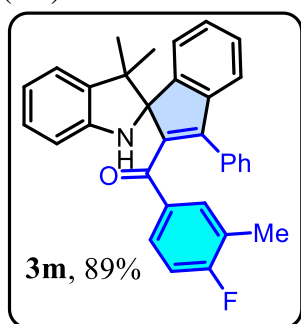

**Yield** 89% (82 mg); **Yellow solid**; **eluent composition** petroleum ether/ethyl acetate = 19:1; **mp** 168–170 °C; Crystallization was done from hot ethanol; **<sup>1</sup>H NMR (400 MHz, CDCl<sub>3</sub>)**  $\delta$  7.40–7.30 (comp, 7H), 7.30–7.20 (comp, 4H), 7.02–6.98 (m, 1H), 6.94 (td,  $J$  = 7.6, 1.3 Hz), 6.83–6.76 (comp, 2H), 6.37 (d,  $J$  = 7.7 Hz), 4.49 (br s, 1H), 2.14 (d,  $J$  = 1.6 Hz, 3H), 1.33 (s, 3H), 1.27 (s, 3H); **<sup>13</sup>C NMR (101 MHz, CDCl<sub>3</sub>)**  $\delta$  194.8, 165.1, 162.6, 148.4, 146.8 (d,  $J$  = 4.9 Hz), 143.8, 141.5, 139.6, 133.97 (d,  $J$  = 2.9 Hz), 133.2, 132.57 (d,  $J$  = 6.4 Hz), 128.8, 128.7, 128.4, 128.4, 128.3, 127.3, 127.2, 124.70 (d,  $J$  = 17.9 Hz), 124.3, 121.9 (d,  $J$  = 12.7 Hz), 119.8, 114.52 (d,  $J$  = 23.1 Hz), 111.1, 86.7, 49.5, 26.0, 25.1, 14.27 (d,  $J$  = 3.1 Hz); **<sup>19</sup>F NMR (376 MHz, CDCl<sub>3</sub>)**  $\delta$  -109.9; **HRMS (ESI, m/z)** calcd for C<sub>32</sub>H<sub>27</sub>FNO [ $M + H$ ]<sup>+</sup> 460.2077 found 460.2070.

**Figure S4.** X-ray crystal structure of **3m** (ellipsoid contour at 50% probability level)

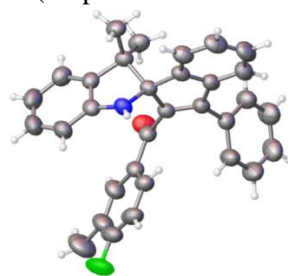

**Crystal data and structure refinement for 3m (CCDC 2534749)**

|                       |                                     |                                                |                                                               |
|-----------------------|-------------------------------------|------------------------------------------------|---------------------------------------------------------------|
| Identification code   | ORTHO_a                             | $\rho_{\text{calc}}/\text{cm}^3$               | 1.235                                                         |
| Empirical formula     | C <sub>32</sub> H <sub>26</sub> FNO | $\mu/\text{mm}^{-1}$                           | 0.626                                                         |
| Formula weight        | 459.54                              | F(000)                                         | 968.0                                                         |
| Temperature/K         | 300.00                              | Crystal size/mm <sup>3</sup>                   | 0.15 × 0.1 × 0.06                                             |
| Crystal system        | orthorhombic                        | Radiation                                      | Cu K $\alpha$ ( $\lambda = 1.54178$ )                         |
| Space group           | Pca2 <sub>1</sub>                   | 2 $\theta$ range for data collection/ $^\circ$ | 7.436 to 136.518                                              |
| a/Å                   | 23.7750(6)                          | Index ranges                                   | -28 ≤ h ≤ 28, -7 ≤ k ≤ 7, -19 ≤ l ≤ 19                        |
| b/Å                   | 6.4009(2)                           | Reflections collected                          | 51697                                                         |
| c/Å                   | 16.2406(5)                          | Independent reflections                        | 4519 [R <sub>int</sub> = 0.0490, R <sub>sigma</sub> = 0.0257] |
| $\alpha$ / $^\circ$   | 90                                  | Data/restraints/parameters                     | 4519/1/320                                                    |
| $\beta$ / $^\circ$    | 90                                  | Goodness-of-fit on F <sup>2</sup>              | 1.045                                                         |
| $\gamma$ / $^\circ$   | 90                                  | Final R indexes [I >= 2 $\sigma$ (I)]          | R <sub>1</sub> = 0.0402, wR <sub>2</sub> = 0.1089             |
| Volume/Å <sup>3</sup> | 2471.52(13)                         | Final R indexes [all data]                     | R <sub>1</sub> = 0.0408, wR <sub>2</sub> = 0.1096             |
| Z                     | 4                                   | Largest diff. peak/hole / e Å <sup>-3</sup>    | 0.28/-0.17                                                    |

**(E)-1-(3',3'-dimethyl-3-phenylspiro[indene-1,2'-indolin]-2-yl)-3-phenylprop-2-en-1-one (3n):**

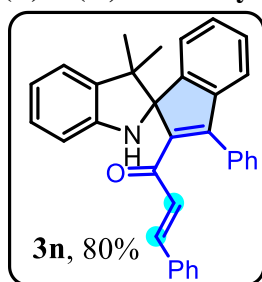

**Yield** 80% (73 mg); Yellow solid; **eluent composition** petroleum ether/ethyl acetate = 19:1; **mp** 103-105 °C; **<sup>1</sup>H NMR (400 MHz, CDCl<sub>3</sub>)**  $\delta$  7.48–7.35 (comp, 6H), 7.32–7.22 (comp, 6H), 7.20–7.12 (m, 5H), 7.08–7.03 (m, 1H), 6.89 (t,  $J = 7.0$  Hz, 2H), 6.61 (d,  $J = 15.8$  Hz, 1H), 1.33 (s, 3H), 1.15 (s, 3H); **<sup>13</sup>C NMR (101 MHz, CDCl<sub>3</sub>)**  $\delta$  192.2, 141.8, 141.2, 134.8, 133.8, 130.1, 128.9 (X2), 128.8, 128.70 (X3), 128.66 (X3), 128.3, 128.1(X3), 127.8, 127.6, 127.0, 123.7, 122.4, 122.1, 85.5, 49.8, 28.0, 25.3; **HRMS (ESI, m/z)** calcd for C<sub>33</sub>H<sub>28</sub>NO [M + H]<sup>+</sup> 454.2171 found 454.2161.

**cyclohexyl(3',3'-dimethyl-3-phenylspiro[indene-1,2'-indolin]-2-yl)methanone (3o):**

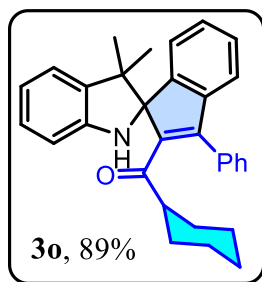

**Yield** 89% (77 mg); Yellow solid; **eluent composition** petroleum ether/ethyl acetate = 19:1; **mp** 113-115 °C; **<sup>1</sup>H NMR (400 MHz, CDCl<sub>3</sub>)**  $\delta$  7.46–7.35 (comp, 5H), 7.25-7.21 (m, 1H), 7.16–7.11 (m, 3H), 7.10–7.04 (comp, 2H), 6.90–6.83 (m, 1H), 6.77 (d,  $J = 7.7$  Hz, 1H), 4.35 (br s, 1 NH), 2.83 (tt,  $J = 11.4, 3.0$  Hz, 1H), 1.64–1.47 (m, 6H), 1.35 (s, 3H), 1.29–1.14 (m, 2H), 1.12 (s, 3H), 1.06–0.95 (m, 3H), 0.93–0.81 (m, 1H). **<sup>13</sup>C NMR (101 MHz, CDCl<sub>3</sub>)**  $\delta$  207.0, 148.8, 147.6, 147.3, 142.0, 139.7, 133.9, 128.9 (X2), 128.31, 128.26 (X2), 127.5, 127.1, 123.5, 122.2, 122.1, 119.8, 110.6, 85.2, 50.6, 49.6, 29.6, 27.2, 26.6, 26.1, 25.7, 25.4, 25.3; **HRMS (ESI, m/z)** calcd for C<sub>31</sub>H<sub>32</sub>NO [M + H]<sup>+</sup> 434.2484 found 434.2472.

**(3',3'-dimethyl-3-phenylspiro[indene-1,2'-indolin]-2-yl)(furan-2-yl)methanone (3p):**

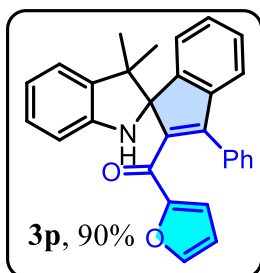

**Yield** 90% (76 mg); Yellow solid; **eluent composition** petroleum ether/ethyl acetate = 19:1; **mp** 145-147 °C;  $^1\text{H NMR}$  (400 MHz,  $\text{CDCl}_3$ )  $\delta$  7.37–7.25 (m, 10H), 7.25–7.18 (m, 1H), 7.02–6.94 (m, 2H), 6.80 (td,  $J = 7.4, 0.9$  Hz, 1H), 6.77–6.74 (m, 1H), 6.55 (d,  $J = 7.7$  Hz, 1H), 6.26 (dd,  $J = 3.6, 1.7$  Hz, 1H), 4.62 (br s, 1 NH), 1.35 (s, 3H), 1.26 (s, 3H);  $^{13}\text{C NMR}$  (101 MHz,  $\text{CDCl}_3$ )  $\delta$  183.0, 153.2, 148.7, 147.2, 146.9, 145.8, 143.5, 141.7, 139.4, 133.3, 128.5, 128.4 (X2), 128.3, 127.4, 127.2, 124.3, 122.0, 121.8, 119.9, 117.9, 112.1, 110.5, 86.9, 49.3, 25.9, 24.9; **HRMS** (ESI,  $m/z$ ) calcd for  $\text{C}_{29}\text{H}_{24}\text{NO}_2$  [ $\text{M} + \text{H}$ ] $^+$  418.1807 found 418.1801.

**(3',3'-dimethyl-3-(thiophen-2-yl)spiro[indene-1,2'-indolin]-2-yl)(phenyl)methanone (3q), (3',3'-dimethyl-2-(thiophen-2-yl)spiro[indene-1,2'-indolin]-3-yl)(phenyl)methanone (3q')**:

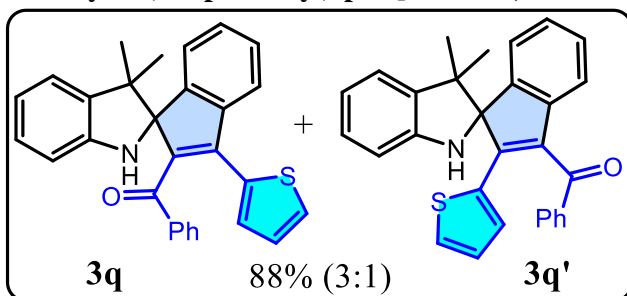

**Combined Yield** 88% inseparable regioisomers (**3r**:**3r'** = 3:1) (76 mg); Yellow solid; **eluent composition** petroleum ether/ethyl acetate = 19:1; **mp** 133-135 °C;  $^1\text{H NMR}$  (400 MHz,  $\text{CDCl}_3$ )  $\delta$  7.91–7.86 (m, 0.75H), 7.57-7.54 (m, 0.46H), 7.50–7.48 (comp, 2.32H), 7.48–7.43 (m, 1.22H), 7.42–7.32 (m, 5H), 7.25–7.18 (m, 4.15H), 7.18–7.10 (comp, 1.77H), 7.08–6.96 (comp, 3H), 6.90–

6.76 (comp, 2.82H), 6.20 (d,  $J = 7.6$  Hz, 1H), 4.32 (br s, 1 NH), 1.34 (s, 3H), 1.27 (s, 3H), 1.11 (s, 1H), 1.08 (s, 1H);  $^{13}\text{C NMR}$  (101 MHz,  $\text{CDCl}_3$ )  $\delta$  196.4, 196.1, 149.1, 148.1, 147.9, 146.2, 144.9, 144.5, 141.6, 140.7, 140.54, 140.47, 139.50, 139.1, 138.0, 136.3, 136.2, 133.5, 133.3, 132.6, 129.3, 128.6, 128.52, 128.49, 128.4, 128.3, 128.0, 127.8, 127.6, 127.4, 127.0, 126.0, 125.8, 125.4, 124.9, 124.6, 124.4, 122.9, 122.3, 121.8, 121.8, 120.9, 119.8, 119.4, 110.9, 109.9, 86.7, 84.8, 49.7, 49.4, 28.9, 26.4, 24.4, 24.2; **HRMS** (ESI,  $m/z$ ) calcd for  $\text{C}_{29}\text{H}_{24}\text{NOS}$  [ $\text{M} + \text{H}$ ] $^+$  434.1579 found 434.1570.

**(3-cyclopropyl-3',3'-dimethylspiro[indene-1,2'-indolin]-2-yl)(phenyl)methanone (3r):**

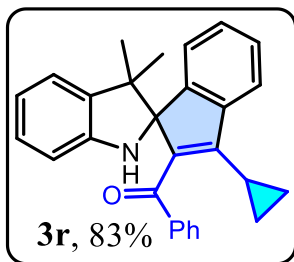

**Yield** 83% (66 mg); Yellow solid; **eluent composition** petroleum ether/ethyl acetate = 19:1; **mp** 108-110 °C;  $^1\text{H NMR}$  (400 MHz,  $\text{CDCl}_3$ )  $\delta$  7.72-7.68 (comp, 2H), 7.53 (tt,  $J = 7.0, 1.3$  Hz, 1H), 7.47–7.44 (m, 1H), 7.40-7.34 (comp, 2H), 7.33 (td,  $J = 7.4, 1.5$  Hz, 1H), 7.23–7.14 (comp, 2H), 7.01–6.93 (m, 1H), 6.91–6.84 (m, 1H), 6.78 (t,  $\eta = 7.3$  Hz, 1H), 6.25 (d,  $J = 6.9$  Hz, 1H), 4.38 (br s, 1 NH), 1.68–1.56 (m, 1H), 1.26 (s, 3H), 1.18 (s, 3H), 0.84-0.77 (m, 1H), 0.74–0.66 (m, 1H), 0.64–0.52 (m, 2H);  $^{13}\text{C NMR}$  (101 MHz,  $\text{CDCl}_3$ )  $\delta$  197.1, 146.4, 142.1, 139.8, 139.1, 132.7, 128.7 (X3),

128.4, 128.2 (X3), 127.4, 126.8, 124.0, 121.7, 121.2, 119.9, 86.2, 49.0, 25.8, 24.9, 9.8, 6.1, 6.0; **HRMS** (ESI,  $m/z$ ) calcd for  $\text{C}_{28}\text{H}_{26}\text{NO}$  [ $\text{M} + \text{H}$ ] $^+$  392.2014 found 392.2009.

**(1R,2S,5R)-2-isopropyl-5-methylcyclohexyl 3',3',7'-trimethyl-3-phenylspiro[indene-1,2'-indoline]-2-carboxylate (4a)**

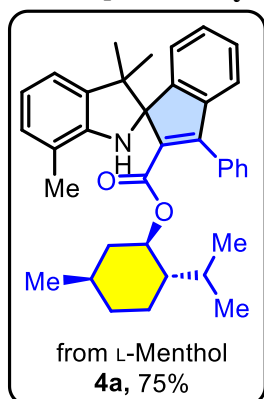

**Yield** 70% (72 mg); diastereomeric ratio (dr = 74:26); Yellow gel; **eluent composition** petroleum ether/ethyl acetate = 19:1; Data for major isomer; **<sup>1</sup>H NMR (400 MHz, CDCl<sub>3</sub>)** δ 7.47-7.43 (m, 1H), 7.42-7.32 (comp, 5H), 7.27-7.18 (comp, 2H), 7.10-7.05 (m, 1H), 6.91 (d, J = 7.3 Hz, 1H), 6.86 (d, J = 7.3 Hz, 1H), 6.75-6.70 (m, 1H), 4.32 (td, J = 10.8, 4.2 Hz, 1H), 2.23 (s, 3H), 1.55-1.42 (m, 4H), 1.34 (s, 3H), 1.23 (s, 3H), 1.21-1.15 (m, 1H), 1.01-0.91 (m, 2H), 0.88-0.79 (m, 2H), 0.76 (d, J = 6.4 Hz, 3H), 0.72-0.66 (m, 2H), 0.51 (d, J = 7.0 Hz, 3H), 0.35 (d, J = 6.8 Hz, 3H); **<sup>13</sup>C NMR (101 MHz, CDCl<sub>3</sub>)** δ 166.8, 156.6, 145.9, 142.7, 138.2, 133.8, 128.56, 128.61, 128.5, 128.4 (x3), 128.3, 128.2, 128.0, 126.6, 125.1, 121.7, 119.7, 85.5, 74.9, 49.3, 46.3, 39.7, 34.1, 31.2, 28.7, 24.5, 23.4, 22.5, 22.0, 20.9, 16.8, 15.6.; **HRMS (ESI, m/z)** calcd for C<sub>36</sub>H<sub>42</sub>NO<sub>2</sub> [M + H]<sup>+</sup> 520.3203 found 520.3203; ; [α]<sub>D</sub><sup>25</sup> = (-) 54.900 (c = 1, EtOH). **HPLC purity data for 4a:** (Phenomenex™ Luna 5 μm C18(2) 100 Å, LC Column 250 x 4.6 mm, 90% MeCN/H<sub>2</sub>O, 0.45 mL/min)

<Chromatogram>

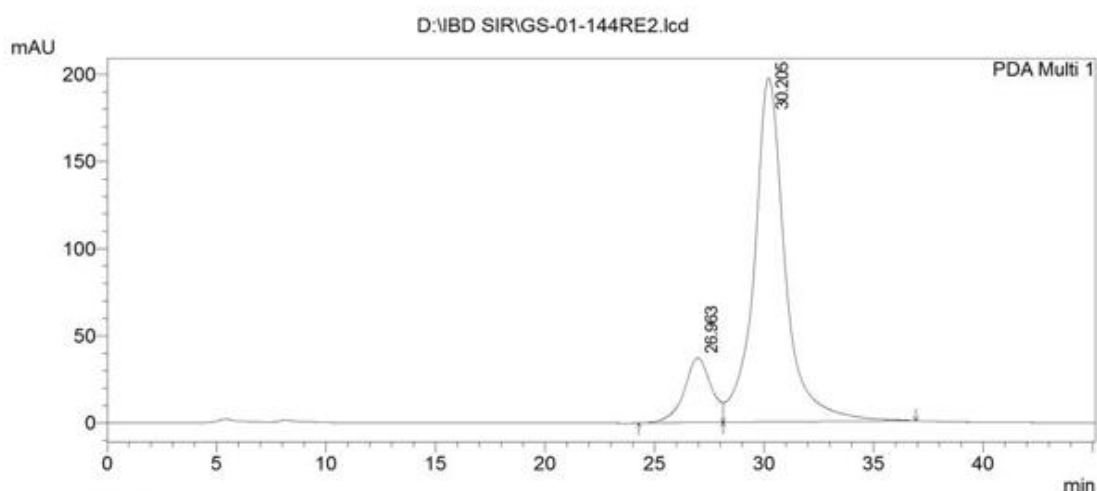

PeakTable

| Peak# | Ret. Time | Area     | Height | Area %  | Height % |
|-------|-----------|----------|--------|---------|----------|
| 1     | 26.963    | 3205785  | 37092  | 14.115  | 15.815   |
| 2     | 30.205    | 19505353 | 197447 | 85.885  | 84.185   |
| Total |           | 22711138 | 234539 | 100.000 | 100.000  |

### 3,7-dimethyloct-6-en-1-yl 3',3'-dimethyl-3-phenylspiro[indene-1,2'-indoline]-2-carboxylate (**4b**)

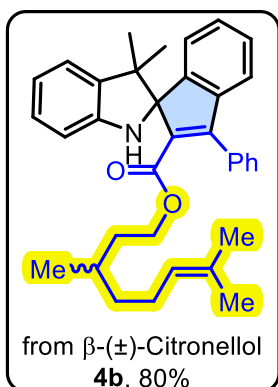

**Yield** 80% (81 mg) inseparable diastereomers (dr = 1:1); **Yellow gel**; **eluent composition** petroleum ether/ethyl acetate = 19:1;  **$^1\text{H NMR}$  (400 MHz,  $\text{CDCl}_3$ )** Data for major isomer  $\delta$  7.46 – 7.34 (comp, 6H), 7.30 – 7.16 (comp, 4H), 7.9-7.07 (m, 1H), 7.04 (app d,  $J = 6.9$  Hz, 1H), 6.87 – 6.78 (comp, 2H), 5.08 – 5.02 (m, 1H), 3.88 – 3.76 (m, 1H), 3.71 – 3.61 (m, 1H), 1.95-1.78 (m, 2H), 1.68 (s, 3H), 1.59 (s, 3H), 1.36 (s, 3H), 1.33-1.13 (m, 3H and d,  $J = 2.0$ , 3H), 1.10-0.96 (m, 2H), 0.73 (dd,  $J = 6.4, 1.3$  Hz, 3H);  **$^{13}\text{C NMR}$  (101 MHz,  $\text{CDCl}_3$ )** 166.9, 149.1, 146.4, 141.9, 139.1, 133.6, 131.2, 128.29 (x3), 128.27 (x3), 127.5, 127.0, 124.6, 124.7, 122.0 (x2), 119.6, 111.1, 84.9, 63.1, 49.2, 36.9, 34.9, 29.2, 27.5, 25.7, 25.3, 24.1, 19.2, 17.6; **HRMS** (ESI,  $m/z$ ) calcd for  $\text{C}_{35}\text{H}_{40}\text{NO}_2$   $[\text{M} + \text{H}]^+$  506.3047 found 506.3056;  $[\alpha]_{\text{D}}^{25} = (-) 0.100$  ( $c = 1$ , EtOH).

**HPLC purity data for 4b:** (Phenomenex<sup>TM</sup> Luna 5  $\mu\text{m}$  C18(2) 100  $\text{\AA}$ , LC Column 250 x 4.6 mm, 90% MeCN/ $\text{H}_2\text{O}$ , 0.45 mL/min)

#### <Chromatogram>

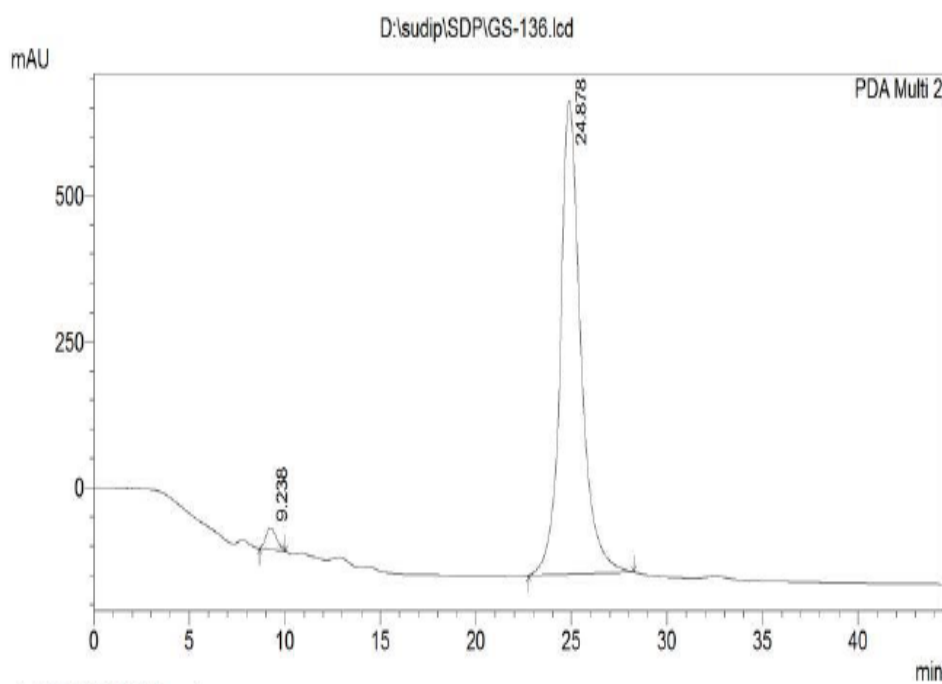

PeakTable

PDA Ch2 210nm 4nm

| Peak# | Ret. Time | Area     | Height | Area %  | Height % |
|-------|-----------|----------|--------|---------|----------|
| 1     | 9.238     | 1413826  | 37732  | 2.276   | 4.451    |
| 2     | 24.878    | 60718111 | 809972 | 97.724  | 95.549   |
| Total |           | 62131937 | 847705 | 100.000 | 100.000  |

**(8R,9S,13S,14S)-13-methyl-17-oxo-7,8,9,11,12,13,14,15,16,17-decahydro-6H-cyclopenta[a]phenanthren-3-yl 3',3'-dimethyl-3-phenylspiro[indene-1,2'-indoline]-2-carboxylate (4c)**

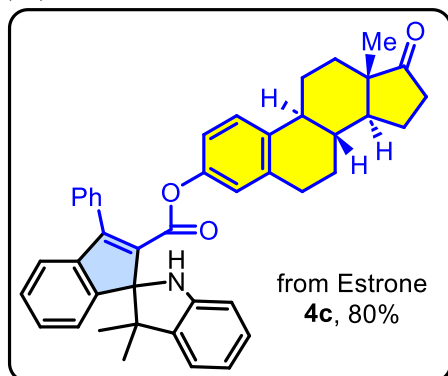

**Yield** 80% (99 mg) inseparable diastereomers (dr = 77:23); Yellow gel; **eluent composition** petroleum ether/ethyl acetate = 19:1; Data for major isomer **<sup>1</sup>H NMR (400 MHz, CDCl<sub>3</sub>)** δ 7.54 – 7.39 (comp, 5H), 7.36 – 7.23 (comp, 4H), 7.15-7.06 (comp, 3H), 6.97-6.87 (m, 1H), 6.89 (app t, *J* = 7.4 Hz, 1H), 6.82 (d, *J* = 7.8 Hz, 1H), 6.24 (app td, *J* = 8.5, 2.4 Hz, 1H), 6.09 (dd, *J* = 6.3, 2.2 Hz, 1H), 2.80 – 2.73 (m, 2H), 2.57 – 2.44 (m, 1H), 2.40 – 2.29 (m, 1H), 2.27 – 2.00 (m, 3H), 1.98-1.91

(m, 2H), 1.68 – 1.43 (m, 4H), 1.47 (s, 3H), 1.46-1.42 (m, 1H), 1.41 – 1.34 (m, 1H), 1.30 (s, 3H), 0.87 (s, 3H); **<sup>13</sup>C NMR (101 MHz, CDCl<sub>3</sub>)** Data for major isomer δ 220.8, 165.6, 149.1, 148.0, 146.0, 141.8, 138.9, 137.6, 137.1, 133.2, 128.5, 128.5, 128.4 (x3), 127.88, 127.86, 127.2, 126.0, 125.0, 122.3, 122.2, 121.4, 119.7, 118.4, 111.3, 85.5, 50.4, 49.3, 47.9, 44.1, 37.9, 35.8, 31.5, 29.3, 28.1, 26.3, 25.7, 23.4, 21.5, 13.8; **HRMS (ESI, m/z)** calcd for C<sub>43</sub>H<sub>42</sub>NO<sub>3</sub> [M + H]<sup>+</sup> 620.3153 found 620.3165;

[α]<sub>D</sub><sup>25</sup> = (-) 0.400 (c = 1, EtOH).

**HPLC purity data for 4c:** (Shimadzu, Shim-pack GIST, C18-5μm, 4.6x2500 mm; 90% MeCN/H<sub>2</sub>O, 2.5 mL/min)

<Chromatogram>

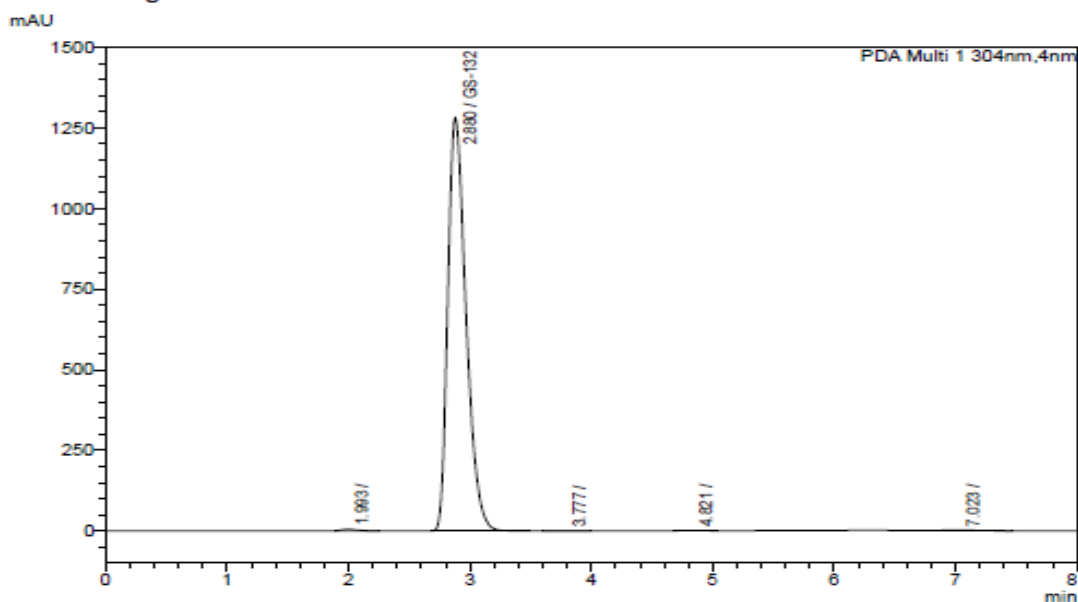

<Peak Table>

| Peak# | Ret. Time | Area     | Height  | Name   | Area%   |
|-------|-----------|----------|---------|--------|---------|
| 1     | 1.993     | 45209    | 5170    |        | 0.337   |
| 2     | 2.880     | 13330008 | 1283026 | GS-132 | 99.336  |
| 3     | 3.777     | 7428     | 613     |        | 0.055   |
| 4     | 4.821     | 10487    | 912     |        | 0.078   |
| 5     | 7.023     | 26011    | 1629    |        | 0.194   |
| Total |           | 13419143 | 1291351 |        | 100.000 |

**(3S,8S,9S,10R,13R,14S,17R)-10,13-dimethyl-17-((R)-6-methylheptan-2-yl)-2,3,4,7,8,9,10,11,12,13,14,15,16,17-tetradecahydro-1H-cyclopenta[a]phenanthren-3-yl 3',3'-dimethyl-3-phenylspiro[indene-1,2'-indoline]-2-carboxylate (4d)**

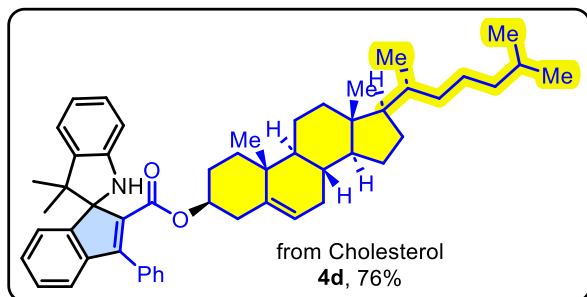

**Yield** 76% (112 mg) inseparable diastereomers (dr = 1:1); **Yellow gel**; **eluent composition** petroleum ether/ethyl acetate = 19:1; Data for inseparable diastereomers **<sup>1</sup>H NMR (400 MHz, CDCl<sub>3</sub>)** δ 7.46 – 7.33 (comp, 12H), 7.28 – 7.09 (comp, 5H), 7.04 (app d, *J* = 7.6 Hz, 2H), 6.88 – 6.81 (comp, 3H), 5.21-5.24 (m, 1H), 5.21 – 5.17 (m, 1H), 4.39-4.29 (m, 2H), 1.99-1.92 (m, 5H), 1.91 – 1.85 (m, 1H), 1.85 – 1.76 (m, 3H), 1.73-1.62 (m, 4H), 1.57-1.46 (m, 8H), 1.46 – 1.39 (m, 5H), 1.37 (d, *J* = 1.9 Hz, 6H), 1.35 – 1.31 (m, 3H), 1.26 (s, , 3H), 1.21 (s, 6H), 1.17-1.07 (m, 10H), 1.06 – 0.94 (m, 11H), 0.91 (s, 3H), 0.89 (s, 3H), 0.88 (s, 6H), 0.87 (d, *J* = 1.7 Hz, 6H), 0.85 (d, *J* = 1.7 Hz, 6H), 0.65 (s, 6H); Data for major isomer **<sup>13</sup>C NMR (101 MHz, CDCl<sub>3</sub>)** 166.1, 146.8, 142.0, 139.7, 139.4, 133.8, 128.5 (x2), 128.4, 128.3 (x2), 128.2 (x2), 127.7, 127.2, 124.8, 122.4, 122.22, 122.19, 119.9, 111.5, 84.7, 74.4, 56.7, 50.1, 49.4, 42.4, 39.8, 39.8, 37.5, 37.1, 36.9, 36.6, 36.3, 35.9, 31.9, 28.3, 28.1, 27.9, 27.1, 27.2, 24.6, 24.3, 23.9, 22.8, 22.6, 21.0, 19.2, 18.7, 11.8; **HRMS (ESI, m/z)** calcd for C<sub>52</sub>H<sub>66</sub>NO<sub>2</sub> [M + H]<sup>+</sup> 736.5094 found 736.5093; [α]<sub>D</sub><sup>25</sup> = (-) 2.700 (c = 1, EtOH).

**HPLC purity data for 4d:** (Shimadzu, Shim-pack GIST, C18-5μm, 4.6x2500 mm; 90% MeCN/H<sub>2</sub>O, 2.5 mL/min)

<Chromatogram>

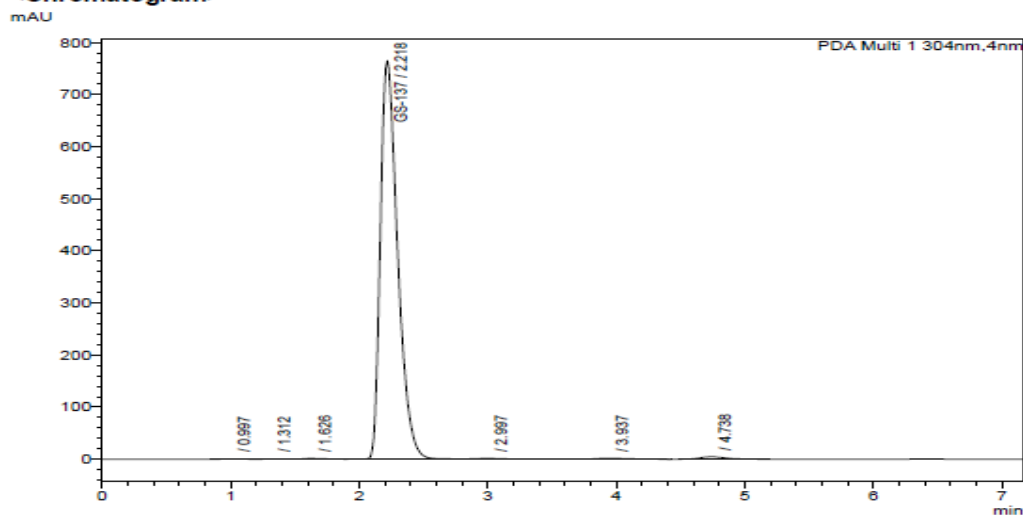

<Peak Table>

| Peak# | Ret. Time | Area    | Height | Name   | Area%   |
|-------|-----------|---------|--------|--------|---------|
| 1     | 0.997     | 2016    | 191    |        | 0.028   |
| 2     | 1.312     | 1313    | 94     |        | 0.018   |
| 3     | 1.626     | 11867   | 1195   |        | 0.164   |
| 4     | 2.218     | 7126116 | 764735 | GS-137 | 98.468  |
| 5     | 2.997     | 16768   | 1317   |        | 0.232   |
| 6     | 3.937     | 21620   | 1535   |        | 0.299   |
| 7     | 4.738     | 57320   | 4487   |        | 0.792   |
| Total |           | 7237020 | 773554 |        | 100.000 |

**(3-(((3S,8S,9S,10R,13R,14S,17R)-10,13-dimethyl-17-((R)-6-methylheptan-2-yl)-2,3,4,7,8,9,10,11,12,13,14,15,16,17-tetradecahydro-1H-cyclopenta[a]phenanthren-3-yl)oxy)methyl)-3',3'-dimethylspiro[indene-1,2'-indolin]-2-yl)(phenyl)methanone (4e)**

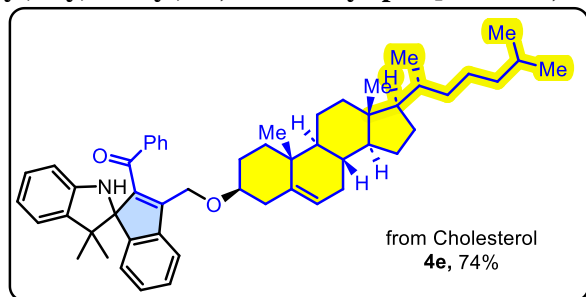

**Yield** 74% (111 mg) inseparable diastereomers (dr = 1:1); **Yellow gel**; **eluent composition** petroleum ether/ethyl acetate = 19:1; **<sup>1</sup>H NMR (400 MHz, CDCl<sub>3</sub>)** data for inseparable mixture  $\delta$  7.92 – 7.86 (m, 1H), 7.67 – 7.47 (comp, 10H), 7.41-7.28 (comp, 9H), 7.22-7.18 (comp, 2H), 6.94 (app d,  $J$  = 6.7 Hz, 4H), 6.83 – 6.71 (comp, 4H), 6.13 – 6.02 (comp, 2H), 5.32 – 5.24 (m, 1H), 5.21-

5.18 (m, 1H), 4.37 (s, 2H), 4.37 (s, 2H), 3.17-3.07 (comp, 2H), 2.27 – 2.17 (m, 2H), 2.14 – 2.03-1.90 (m, 4H), 1.87-1.74(m, 6H), 1.60 – 1.28 (m, 27H), 1.25 (d,  $J$  = 1.6 Hz, 6H), 1.12 (s, 6H), 1.17-0.94 (m, 20H), 0.93 (s, 6H), 0.92 (s, 3H), 0.90 (s, 3H), 0.87 (d,  $J$  = 1.6 Hz, 6H), 0.86 (d,  $J$  = 1.6 Hz, 6H), 0.66 (s, 6H); **<sup>13</sup>C NMR (101 MHz, CDCl<sub>3</sub>)** data for major isomer 196.4, 147.9, 146.5, 142.9, 141.4, 140.6, 138.9, 132.8, 129.7, 129.0, 128.6, 128.47, 128.46, 128.2, 127.4, 126.8, 124.4, 121.81, 121.75, 119.7, 110.7, 87.0, 78.9, 62.2, 56.7, 56.1, 50.1, 48.9, 42.3, 39.8, 39.5, 38.7, 38.6, 37.1, 36.8, 36.2, 36.8, 31.9, 31.8, 28.2, 28.1, 28.0, 27.9, 26.7, 24.3, 23.8, 22.8, 22.9, 21.0, 19.3, 18.7, 11.8; **HRMS** (ESI, m/z) calcd for C<sub>53</sub>H<sub>68</sub>NO<sub>2</sub> [M + H]<sup>+</sup> 750.5250 found 750.5231.  $[\alpha]_D^{25}$  = (-) 16.300 (c = 1, EtOH).

**HPLC purity data for 4e:** (Shimadzu, Shim-pack GIST, C18-5 $\mu$ m, 4.6x2500 mm; 90% MeCN/H<sub>2</sub>O, 2.5 mL/min)

<Chromatogram>

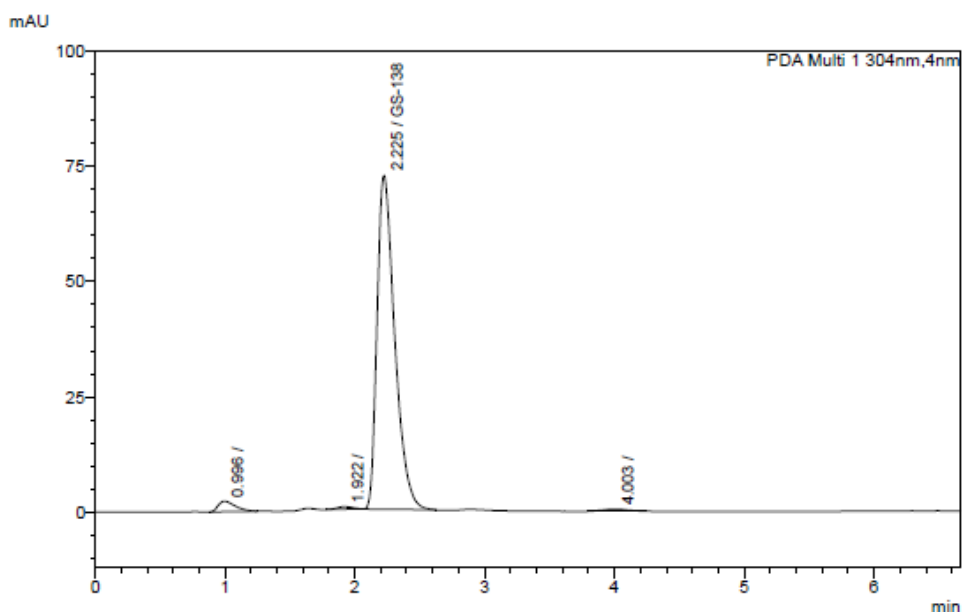

<Peak Table>

| Peak# | Ret. Time | Area   | Height | Name   | Area%   |
|-------|-----------|--------|--------|--------|---------|
| 1     | 0.996     | 20704  | 2286   |        | 2.894   |
| 2     | 1.922     | 4377   | 551    |        | 0.612   |
| 3     | 2.225     | 684338 | 72371  | GS-138 | 95.648  |
| 4     | 4.003     | 6060   | 420    |        | 0.847   |
| Total |           | 715479 | 75628  |        | 100.000 |

**phenyl(3',3',5'-trimethyl-3-phenylspiro[indene-1,2'-indolin]-2-yl)methanone (5a):**

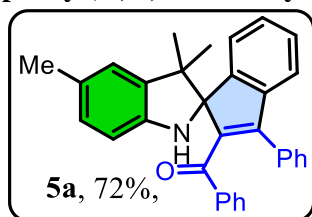

**Yield** 72% (64 mg); Yellow solid; **eluent composition** petroleum ether/ethyl acetate = 19:1; **mp** 168-170 °C; **<sup>1</sup>H NMR (400 MHz, CDCl<sub>3</sub>)** δ 7.53–7.50 (comp, 2H), 7.36–7.33 (comp, 2H), 7.32–7.29 (m, 2H), 7.28 (s, 1H), 7.26–7.15 (m, 7H), 6.81 (s, 1H), 6.73 (d, *J* = 7.8 Hz, 1H), 6.24 (d, *J* = 7.8 Hz, 1H), 2.29 (s, 3H), 1.32 (s, 3H), 1.24 (s, 3H); **<sup>13</sup>C NMR (101 MHz, CDCl<sub>3</sub>)** δ 196.4, 147.0, 141.6, 140.2, 137.9, 133.3, 132.4, 128.9 (X2), 128.8 (X2), 128.3 (X4), 127.9 (X2), 127.8, 127.1, 124.3, 122.6,

121.9, 111.5, 86.8, 49.5, 25.7, 25.3, 21.0; **HRMS** (ESI, *m/z*) calcd for C<sub>32</sub>H<sub>28</sub>NO [M + H]<sup>+</sup> 442.2171 found 442.2164.

**(5'-methoxy-3',3'-dimethyl-3-phenylspiro[indene-1,2'-indolin]-2-yl)(phenyl)methanone (5b):**

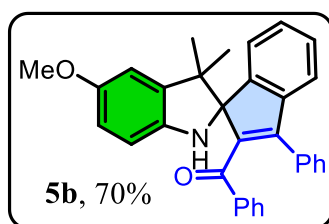

**Yield** 70% (64 mg); Yellow solid; **eluent composition** petroleum ether/ethyl acetate = 19:1; **mp** 163-165 °C; **<sup>1</sup>H NMR (400 MHz, CDCl<sub>3</sub>)** δ 7.55–7.51 (comp, 2H), 7.36–7.30 (comp, 5H), 7.28–7.15 (m, 7H), 6.63 (d, *J* = 2.6 Hz, 1H), 6.50 (dd, *J* = 8.4, 2.5 Hz, 1H), 6.29 (d, *J* = 6.1 Hz, 1H), 3.78 (s, 3H), 1.31 (s, 3H), 1.24 (s, 3H); **<sup>13</sup>C NMR (101 MHz, CDCl<sub>3</sub>)** δ 196.4, 154.7, 147.2, 147.0, 143.4, 142.0, 141.7, 141.6, 137.9, 133.2, 132.5, 128.8 (X2), 128.3 (X2), 127.9, 127.2, 124.2, 122.0, 112.6,

112.2, 108.8, 87.0, 55.8, 49.8, 25.5, 25.3; **HRMS** (ESI, *m/z*) calcd for C<sub>32</sub>H<sub>28</sub>NO<sub>2</sub> [M + H]<sup>+</sup> 458.2120 found 458.2119.

**(5'-fluoro-3',3'-dimethyl-3-phenylspiro[indene-1,2'-indolin]-2-yl)(phenyl)methanone (5c):**

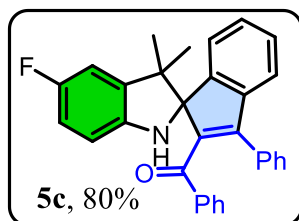

**Yield** 80% (72 mg); Yellow solid; **eluent composition** petroleum ether/ethyl acetate = 19:1; **mp** 136-138 °C; **<sup>1</sup>H NMR (400 MHz, CDCl<sub>3</sub>)** δ 7.54–7.50 (comp, 2H), 7.38–7.31 (comp, 5H), 7.28–7.17 (comp, 6H), 6.73 (dd, *J* = 8.2, 2.6 Hz, 1H), 6.64–6.57 (m, 1H), 6.21 (dd, *J* = 8.4, 4.3 Hz, 1H), 4.57 (br s, 1 NH), 1.34 (s, 3H), 1.26 (s, 3H); **<sup>13</sup>C NMR (101 MHz, CDCl<sub>3</sub>)** δ 196.3, 159.3, 156.9, 147.0, 146.3, 143.80 (d, *J* = 45.2 Hz), 141.80 (d, *J* = 7.2 Hz), 141.7, 137.8, 133.1, 132.6, 128.84, 128.80, 128.5, 128.4, 128.3,

128.0, 127.2, 124.4, 122.1, 113.48 (d, *J* = 23.4 Hz), 111.79 (d, *J* = 7.9 Hz), 109.55 (d, *J* = 23.9 Hz), 87.1, 49.7, 25.9, 24.7; **<sup>19</sup>F NMR (376 MHz, CDCl<sub>3</sub>)** δ -124.2; **HRMS** (ESI, *m/z*) calcd for C<sub>31</sub>H<sub>25</sub>NOF [M + H]<sup>+</sup> 446.1920 found 446.1928.

**(5'-chloro-3',3'-dimethyl-3-phenylspiro[indene-1,2'-indolin]-2-yl)(phenyl)methanone (5d):**

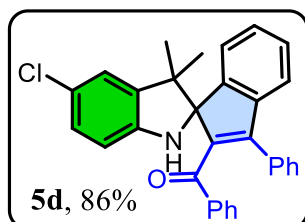

**Yield** 86% (80 mg); Yellow solid; **eluent composition** petroleum ether/ethyl acetate = 19:1; **mp** 174-176 °C; **<sup>1</sup>H NMR (400 MHz, CDCl<sub>3</sub>)** δ 7.56–7.52 (comp, 2H), 7.38–7.29 (comp, 6H), 7.28–7.15 (comp, 6H), 6.95 (d, *J* = 2.1 Hz, 1H), 6.88 (dd, *J* = 8.2, 2.1 Hz, 1H), 6.24 (d, *J* = 8.2 Hz, 1H), 1.33 (s, 3H), 1.25 (s, 3H); **<sup>13</sup>C NMR (101 MHz, CDCl<sub>3</sub>)** δ 196.1, 147.1, 146.9, 146.3, 143.4, 141.5, 137.7, 133.0, 132.6, 128.9, 128.8, 128.6, 128.4, 128.3 (X2), 128.0 (X2), 127.2, 124.6, 124.3, 122.3, 122.1, 111.8,

49.7, 25.9, 25.0; **HRMS** (ESI, *m/z*) calcd for C<sub>31</sub>H<sub>25</sub>NOCl [M + H]<sup>+</sup> 462.1625 found 462.1631.

**(5'-bromo-3',3'-dimethyl-3-phenylspiro[indene-1,2'-indolin]-2-yl)(phenyl)methanone (5e):**

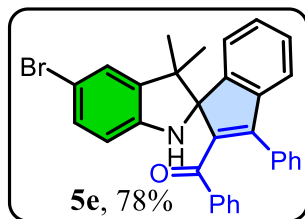

**Yield** 78% (79 mg); Yellow solid; **eluent composition** petroleum ether/ethyl acetate = 19:1; **mp** 176-178 °C; **<sup>1</sup>H NMR (400 MHz, CDCl<sub>3</sub>)** δ 7.57–7.50 (comp, 2H), 7.38–7.29 (comp, 6H), 7.28–7.15 (comp, 6H), 6.95 (d, *J* = 2.0 Hz, 1H), 6.88 (dd, *J* = 8.2, 2.1 Hz, 1H), 6.24 (d, *J* = 8.2 Hz, 1H), 4.56 (br s, 1 NH), 1.33 (s, 3H), 1.25 (s, 3H); **<sup>13</sup>C NMR (101 MHz, CDCl<sub>3</sub>)** δ 196.1, 147.1, 146.9, 146.3, 143.3, 141.6, 137.8, 133.0, 132.6, 128.9, 128.8, 128.6, 128.4, 128.4 (X2), 128.0 (X2), 127.2, 124.6, 124.3,

122.3, 122.1, 111.9, 86.8, 49.7, 25.9, 25.0; **HRMS** (ESI, *m/z*) calcd for C<sub>31</sub>H<sub>25</sub>NOBr [M + H]<sup>+</sup> 506.1120 found 506.1104.

**(3',3'-dimethyl-3-phenyl-5'-(trifluoromethoxy)spiro[indene-1,2'-indolin]-2-yl)(phenyl)methanone (5f):**

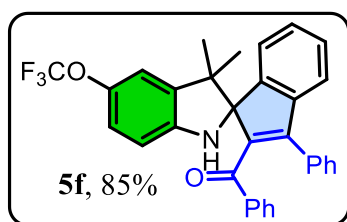

**Yield** 85% (87 mg); Yellow solid; **eluent composition** petroleum ether/ethyl acetate = 19:1; **mp** 154-156 °C; **<sup>1</sup>H NMR (400 MHz, CDCl<sub>3</sub>)** δ 7.50-7.46 (comp, 2H), 7.40–7.32 (comp, 6H), 7.29–7.16 (comp, 6H), 6.86–6.82 (m, 1H), 6.76–6.70 (m, 1H), 6.16 (d, *J* = 8.4, 1H) 4.49 (s, 1 NH), 1.35 (s, 3H), 1.28 (s, 3H); **<sup>13</sup>C NMR (101 MHz, CDCl<sub>3</sub>)** δ 196.1, 147.0, 146.6, 145.5, 144.0, 142.7, 141.8, 140.9, 133.0, 132.6, 128.8, 128.70, 128.67, 128.44, 128.38, 128.0, 127.1, 124.6,

122.1, 121.93–119.39 (m), 120.5, 119.4, 115.7, 110.7, 87.1, 49.5, 26.5, 24.0; **<sup>19</sup>F NMR (376 MHz, CDCl<sub>3</sub>)** δ -58.2; **HRMS** (ESI, *m/z*) calcd for C<sub>31</sub>H<sub>25</sub>NOF<sub>3</sub> [M + H]<sup>+</sup> 512.1837 found 512.1832.

**phenyl(3',3',7'-trimethyl-3-phenylspiro[indene-1,2'-indolin]-2-yl)methanone (5g):**

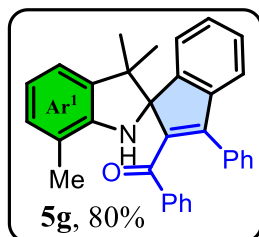

**Yield** 80% (71 mg); Yellow solid; **eluent composition** petroleum ether/ethyl acetate = 19:1; **mp** 184-186 °C; **<sup>1</sup>H NMR (400 MHz, CDCl<sub>3</sub>)** δ 7.51–7.48 (m, 1H), 7.46–7.40 (comp, 4H), 7.38–7.33 (comp, 3H), 7.32–7.19 (comp, 6H), 6.87 (d, *J* = 7.0 Hz, 1H), 6.79–6.68 (m, 2H), 4.23 (br s, 1 NH), 1.56 (s, 3H), 1.42 (s, 3H), 1.31 (s, 3H); **<sup>13</sup>C NMR (101 MHz, CDCl<sub>3</sub>)** δ 196.3, 146.3, 145.8, 145.6, 144.5, 142.3, 139.2, 138.3, 133.1, 132.5, 128.8, 128.6, 128.44, 128.36, 128.2, 128.1, 128.0, 126.7, 125.0, 121.7, 121.0, 120.2, 119.4, 87.0, 49.5, 27.3, 23.0, 15.8; **HRMS** (ESI, *m/z*) calcd for C<sub>32</sub>H<sub>28</sub>NO [M + H]<sup>+</sup> 442.2171 found

442.2181.

**(5-ethyl-3',3'-dimethyl-3-phenylspiro[indene-1,2'-indolin]-2-yl)(phenyl)methanone (5h):**

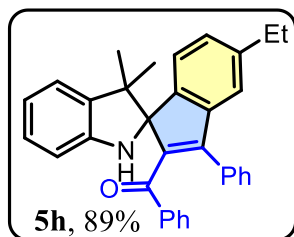

**Yield** 89% (81 mg); Yellow solid; **eluent composition** petroleum ether/ethyl acetate = 19:1; **mp** 155-157 °C; **<sup>1</sup>H NMR (400 MHz, CDCl<sub>3</sub>)** δ 7.53–7.48 (comp, 2H), 7.41–7.31 (comp, 3H), 7.30–7.21 (comp, 4H), 7.21–7.14 (comp, 3H), 7.08 (d, *J* = 7.7 Hz, 0H), 7.00 (d, *J* = 7.2 Hz, 0H), 6.89 (t, *J* = 7.5 Hz, 0H), 6.79 (t, *J* = 7.3 Hz, 0H), 6.32 – 6.22 (m, 17H), 4.49 (br s, 1 NH), 2.66 (q, *J* = 7.5 Hz, 2H), 1.37 (s, 3H), 1.29 (s, 3H), 1.26–1.21 (m, 3H); **<sup>13</sup>C NMR (101 MHz, CDCl<sub>3</sub>)** δ 196.2, 148.2, 146.5, 144.8, 144.6, 143.7, 142.0, 139.7, 138.1, 133.3, 132.4, 128.84, 128.78, 128.3, 128.2, 127.9, 127.3,

126.6, 124.3, 121.8, 121.5, 119.8, 111.0, 86.5, 49.3, 28.9, 26.3, 24.5, 15.7; **HRMS** (ESI, *m/z*) calcd for C<sub>33</sub>H<sub>30</sub>NO [M + H]<sup>+</sup> 456.2327 found 456.2314.

**(5-fluoro-3',3'-dimethyl-3-phenylspiro[indene-1,2'-indolin]-2-yl)(phenyl)methanone (5i):**

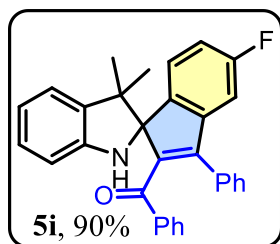

**Yield** 90% (80 mg); Yellow solid; **eluent composition** petroleum ether/ethyl acetate = 19:1; **mp** 164-166 °C; **<sup>1</sup>H NMR (400 MHz, CDCl<sub>3</sub>)** δ 7.52–7.46 (comp, 2H), 7.39–7.32 (comp, 3H), 7.31–7.16 (comp, 6H), 7.06–6.97 (comp, 2H), 6.95–6.85 (comp, 2H), 6.79 (td, *J* = 7.4, 0.9 Hz, 1H), 6.24 (d, *J* = 7.6 Hz, 1H), 4.48 (br s, 1 NH), 1.35 (s, 3H), 1.27 (s, 3H); **<sup>13</sup>C NMR (101 MHz, CDCl<sub>3</sub>)** δ 195.7, 164.6, 162.2, 147.9, 146.3, 145.31–145.02 (m), 144.01 (d, *J* = 8.5 Hz), 141.6 (d, *J* = 2.4 Hz), 139.4, 137.7, 132.6, 128.73, 128.66, 128.6, 128.5, 128.0, 127.5, 125.49 (d, *J* = 8.6 Hz), 121.9, 120.0, 113.41 (d, *J* = 22.6 Hz), 111.2, 109.26 (d, *J* = 23.9 Hz), 86.2, 49.4, 26.4, 24.3; **<sup>19</sup>F NMR (376 MHz, CDCl<sub>3</sub>)** δ -113.4; **HRMS (ESI, m/z)** calcd for C<sub>31</sub>H<sub>25</sub>NOF [M + H]<sup>+</sup> 446.1920 found 446.1908.

**(5-chloro-3',3'-dimethyl-3-phenylspiro[indene-1,2'-indolin]-2-yl)(phenyl)methanone (5j):**

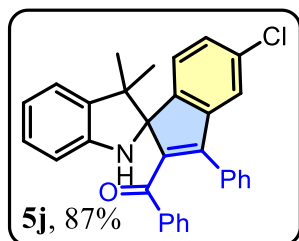

**Yield** 87% (81 mg); Yellow solid; **eluent composition** petroleum ether/ethyl acetate = 19:1; **mp** 172-174 °C; **<sup>1</sup>H NMR (400 MHz, CDCl<sub>3</sub>)** δ 7.50-7.46 (comp, 2H), 7.39–7.31 (comp, 3H), 7.30–7.22 (comp, 5H), 7.22–7.17 (comp, 3H), 7.01–6.97 (m, 1H), 6.90 (td, *J* = 7.6, 1.3 Hz, 1H), 6.81 (td, *J* = 7.4, 0.9 Hz, 1H), 4.63 (br s, 1 NH), 1.34 (s, 3H), 1.26 (s, 3H); **<sup>13</sup>C NMR (101 MHz, CDCl<sub>3</sub>)** δ 195.7, 147.7, 145.6, 145.4, 144.6, 143.6, 139.4, 137.6, 134.4, 132.7, 132.5, 128.8, 128.7, 128.6, 128.5, 128.0, 127.6, 126.9, 125.4, 122.1, 121.9, 120.2, 111.3, 86.3, 49.5, 26.2, 24.6; **HRMS (ESI, m/z)** calcd for C<sub>31</sub>H<sub>25</sub>ClNO [M + H]<sup>+</sup> 462.1625 found 462.1620.

**(5-bromo-3',3'-dimethyl-3-phenylspiro[indene-1,2'-indolin]-2-yl)(phenyl)methanone (5k):**

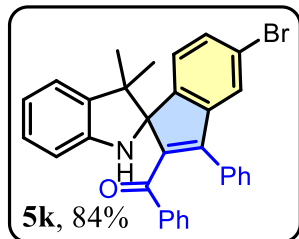

**Yield** 84% (85 mg); Yellow solid; **eluent composition** petroleum ether/ethyl acetate = 19:1; **mp** 165-167 °C; **<sup>1</sup>H NMR (400 MHz, CDCl<sub>3</sub>)** δ 7.50–7.45 (comp, 2H), 7.43 (d, *J* = 1.7 Hz, 1H), 7.39–7.30 (comp, 4H), 7.29–7.22 (comp, 3H), 7.21–7.16 (comp, 3H), 6.99 (d, *J* = 7.3 Hz, 1H), 6.94–6.88 (m, 1H), 6.81 (t, *J* = 7.3 Hz, 1H), 6.30 (d, *J* = 7.4 Hz, 1H), 4.76 (br s, 1 NH), 1.34 (s, 3H), 1.25 (s, 3H); **<sup>13</sup>C NMR (101 MHz, CDCl<sub>3</sub>)** δ 195.7, 145.1, 143.9, 139.4, 137.6, 132.7, 132.5, 129.8, 128.8, 128.7, 128.6 (X2), 128.5 (X2), 128.0 (X2), 127.6, 125.8, 125.0, 122.4, 121.9, 120.3, 111.5, 86.4, 49.5, 26.1, 24.7; **HRMS (ESI, m/z)** calcd for C<sub>31</sub>H<sub>25</sub>NOBr [M + H]<sup>+</sup> 506.1120 found 506.1125.

**(7-fluoro-3',3'-dimethyl-3-phenylspiro[indene-1,2'-indolin]-2-yl)(phenyl)methanone (5l):**

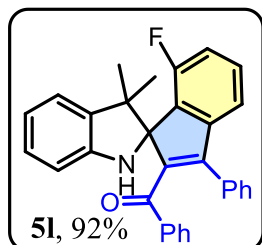

**Yield** 92% (92 mg); Yellow solid; **eluent composition** petroleum ether/ethyl acetate = 19:1; **mp** 149-151 °C; **<sup>1</sup>H NMR (400 MHz, CDCl<sub>3</sub>)** δ 7.52–7.47 (comp, 2H), 7.38–7.32 (m, 3H), 7.31–7.16 (comp, 7H), 7.11 (d, *J* = 7.4 Hz, 1H), 7.01–6.93 (m, 2H), 6.90 (td, *J* = 7.6, 1.3 Hz, 1H), 6.79 (td, *J* = 7.4, 0.9 Hz, 1H), 6.28 (d, *J* = 7.7 Hz, 1H), 4.74 (br s, 1 NH), 1.39 (s, 3H), 1.35 (d, *J* = 2.9 Hz, 3H); **<sup>13</sup>C NMR (101 MHz, CDCl<sub>3</sub>)** δ 195.6, 160.1, 157.5, 147.5, 145.69-145.53 (m), 145.45-145.29 (m), 145.0 (d, *J* = 5.9 Hz), 140.0, 137.7, 132.8, 132.6, 131.24 (d, *J* = 15.5 Hz), 130.25 (d, *J* = 7.7 Hz), 128.85 (d, *J* = 2.6 Hz), 128.5, 128.4, 127.9, 127.4, 121.4, 119.9, 118.09 (d, *J* = 2.6 Hz), 115.79 (d, *J* = 23.7 Hz), 111.3, 87.78 (d, *J* = 3.0 Hz), 50.7, 26.88 (d, *J* = 5.1 Hz), 25.5; **<sup>19</sup>F NMR (376 MHz, CDCl<sub>3</sub>)** δ -109.1; **HRMS (ESI, m/z)** calcd for C<sub>31</sub>H<sub>25</sub>NOF [M + H]<sup>+</sup> 446.1920 found 446.1917.

**(6-bromo-3',3'-dimethyl-3-phenylspiro[indene-1,2'-indolin]-2-yl)(phenyl)methanone (5m):**

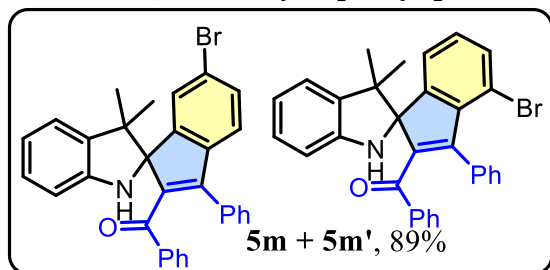

**Combined Yield** 89% (90 mg) regioisomeric ratio (**5m:5m'**=94:6) ; Yellow solid; **eluent composition** petroleum ether/ethyl acetate = 19:1; **mp** 150-152 °C; Crystallization was done from hot ethanol; Data for major isomer **<sup>1</sup>H NMR (400 MHz, CDCl<sub>3</sub>)** <sup>1</sup>H NMR (400 MHz, Chloroform-d) δ 7.48-7.43 (comp, 3H), 7.44-7.37 (m, 1H), 7.37-7.29 (comp, 3H), 7.27-7.24 (comp, 2H), 7.23-7.14 (comp, 4H), 7.00 – 6.96 (m, 1H), 6.89 (td, *J* = 7.6, 1.3 Hz, 1H), 6.82-6.76 (m, 1H),

6.26 (d, *J* = 7.6 Hz 1H), 4.62 (br s, 1 NH), 1.34 (s, 3H), 1.27 (s, 3H); **<sup>13</sup>C NMR (101 MHz, CDCl<sub>3</sub>)** δ 195.7, 148.5, 147.6, 145.7, 144.4, 140.8, 139.3, 137.7, 134.4, 132.7, 132.6, 131.5, 128.7, 128.7, 128.5, 128.4, 128.0, 127.9, 127.74, 127.66, 123.2, 121.9, 121.4, 120.3, 111.4, 86.5, 49.7, 26.3, 24.6; **HRMS** (ESI, *m/z*) calcd for C<sub>31</sub>H<sub>25</sub>NOBr [M + H]<sup>+</sup> 506.1120 found 506.1116.

**Figure S5.** X-ray crystal structure of **5m** (ellipsoid contour at 50% probability level)

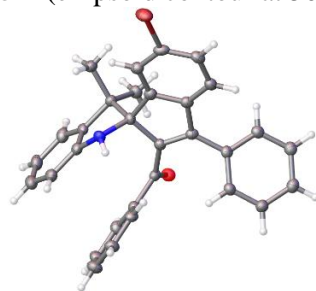

**Crystal data and structure refinement for 5m (CCDC 2251983)**

|                       |                                      |                                                              |                                                                              |
|-----------------------|--------------------------------------|--------------------------------------------------------------|------------------------------------------------------------------------------|
| Identification code   | GS01_129NEW_0m_a                     | $\rho_{\text{calc}}/\text{cm}^3$                             | 1.428                                                                        |
| Empirical formula     | C <sub>31</sub> H <sub>24</sub> BrNO | $\mu/\text{mm}^{-1}$                                         | 2.562                                                                        |
| Formula weight        | 506.446                              | F(000)                                                       | 1040.1                                                                       |
| Temperature/K         | 100.00                               | Crystal size/mm <sup>3</sup>                                 | 0.12 × 0.11 × 0.09                                                           |
| Crystal system        | monoclinic                           | Radiation                                                    | Cu K $\alpha$ ( $\lambda$ = 1.54178)                                         |
| Space group           | P2 <sub>1</sub> /n                   | 2 $\theta$ range for data collection/°                       | 8.88 to 133.82                                                               |
| <i>a</i> /Å           | 10.6361(19)                          | Index ranges                                                 | -12 ≤ <i>h</i> ≤ 12, -22 ≤ <i>k</i> ≤ 22, -13 ≤ <i>l</i> ≤ 13                |
| <i>b</i> /Å           | 18.871(3)                            | Reflections collected                                        | 36092                                                                        |
| <i>c</i> /Å           | 11.745(2)                            | Independent reflections                                      | 4130 [ <i>R</i> <sub>int</sub> = 0.0771, <i>R</i> <sub>sigma</sub> = 0.0443] |
| $\alpha$ /°           | 90                                   | Data/restraints/parameters                                   | 4130/0/310                                                                   |
| $\beta$ /°            | 91.944(7)                            | Goodness-of-fit on <i>F</i> <sup>2</sup>                     | 1.044                                                                        |
| $\gamma$ /°           | 90                                   | Final <i>R</i> indexes [ <i>I</i> ≥ 2 $\sigma$ ( <i>I</i> )] | <i>R</i> <sub>1</sub> = 0.0575, <i>wR</i> <sub>2</sub> = 0.1702              |
| Volume/Å <sup>3</sup> | 2355.9(7)                            | Final <i>R</i> indexes [all data]                            | <i>R</i> <sub>1</sub> = 0.0607, <i>wR</i> <sub>2</sub> = 0.1741              |
| <i>Z</i>              | 4                                    | Largest diff. peak/hole / e Å <sup>-3</sup>                  | 1.11/-1.04                                                                   |

**(4-methoxyphenyl)(3',3',5'-trimethyl-3-phenylspiro[indene-1,2'-indolin]-2-yl)methanone (5n):**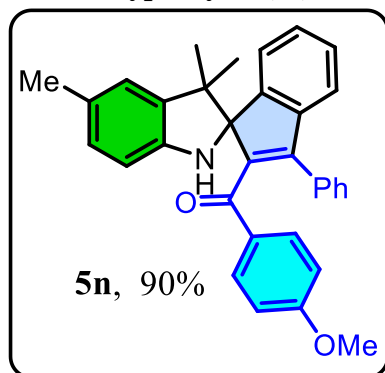

**Yield** 90% (85 mg); Yellow solid; **eluent composition** petroleum ether/ethyl acetate = 19:1; **mp** 154-156 °C; Crystallization was done from hot ethanol; **<sup>1</sup>H NMR (400 MHz, CDCl<sub>3</sub>)** δ 7.57–7.50 (comp, 2H), 7.37–7.33 (comp, 2H), 7.30–7.23 (comp, 2H), 7.27–7.15 (comp, 5H), 6.82 (s, 1H), 6.77 (d, *J* = 7.8 Hz, 1H), 6.69–6.63 (comp, 2H), 6.36 (d, *J* = 7.5 Hz, 1H), 4.63 (br s, 1 NH), 3.77 (s, 3H), 2.30 (s, 3H), 1.31 (s, 3H), 1.24 (s, 3H); **<sup>13</sup>C NMR (101 MHz, CDCl<sub>3</sub>)** δ 194.9, 163.0, 147.3, 141.6, 140.4, 133.4, 131.3 (X2), 130.8, 128.8 (X2), 128.3 (X2), 128.24, 128.20, 127.7, 127.0, 124.1, 122.6, 121.8, 113.2 (X2), 111.7, 86.7, 55.3, 49.5, 25.7, 25.4, 21.0; **HRMS (ESI, m/z)** calcd for C<sub>33</sub>H<sub>30</sub>NO<sub>2</sub> [M + H]<sup>+</sup> 472.2277 found 472.2271.

**Figure S6.** X-ray crystal structure of **5n** (ellipsoid contour at 50% probability level)

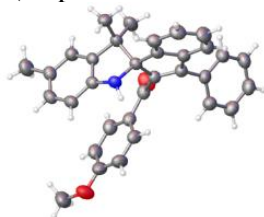

**Crystal data and structure refinement for 5n (CCDC 2534750)**

|                       |                                                 |                                                              |                                                                              |
|-----------------------|-------------------------------------------------|--------------------------------------------------------------|------------------------------------------------------------------------------|
| Identification code   | IM_06_49_FINAL_a                                | $\rho_{\text{calc}}/\text{cm}^3$                             | 1.246                                                                        |
| Empirical formula     | C <sub>33</sub> H <sub>29</sub> NO <sub>2</sub> | $\mu/\text{mm}^{-1}$                                         | 0.599                                                                        |
| Formula weight        | 471.57                                          | F(000)                                                       | 500.0                                                                        |
| Temperature/K         | 299.00                                          | Crystal size/mm <sup>3</sup>                                 | 0.2 × 0.13 × 0.09                                                            |
| Crystal system        | triclinic                                       | Radiation                                                    | Cu K $\alpha$ ( $\lambda$ = 1.54178)                                         |
| Space group           | P-1                                             | 2 $\theta$ range for data collection/°                       | 8.498 to 136.658                                                             |
| <i>a</i> /Å           | 10.5299(4)                                      | Index ranges                                                 | -12 ≤ <i>h</i> ≤ 12, -14 ≤ <i>k</i> ≤ 14, -14 ≤ <i>l</i> ≤ 13                |
| <i>b</i> /Å           | 11.7051(5)                                      | Reflections collected                                        | 45352                                                                        |
| <i>c</i> /Å           | 12.2331(6)                                      | Independent reflections                                      | 4576 [ <i>R</i> <sub>int</sub> = 0.0422, <i>R</i> <sub>sigma</sub> = 0.0273] |
| $\alpha$ /°           | 110.007(2)                                      | Data/restraints/parameters                                   | 4576/0/330                                                                   |
| $\beta$ /°            | 108.936(2)                                      | Goodness-of-fit on <i>F</i> <sup>2</sup>                     | 1.062                                                                        |
| $\gamma$ /°           | 101.341(2)                                      | Final <i>R</i> indexes [ <i>I</i> ≥ 2 $\sigma$ ( <i>I</i> )] | <i>R</i> <sub>1</sub> = 0.0436, <i>wR</i> <sub>2</sub> = 0.1159              |
| Volume/Å <sup>3</sup> | 1257.25(10)                                     | Final <i>R</i> indexes [all data]                            | <i>R</i> <sub>1</sub> = 0.0468, <i>wR</i> <sub>2</sub> = 0.1172              |
| <i>Z</i>              | 2                                               | Largest diff. peak/hole / e Å <sup>-3</sup>                  | 0.24/-0.17                                                                   |

**phenyl(3''-phenyldispiro[cyclohexane-1,3'-indoline-2',1''-inden]-2''-yl)methanone (5o):**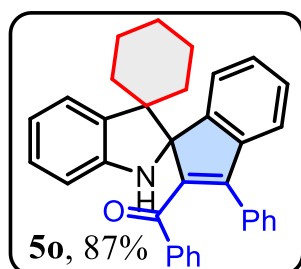

**Yield** 87% (82 mg); Yellow solid; **eluent composition** petroleum ether/ethyl acetate = 19:1; **mp** 176-178 °C; **<sup>1</sup>H NMR (400 MHz, CDCl<sub>3</sub>)** δ 7.51–7.45 (comp, 2H), 7.40 (d, *J* = 7.3 Hz, 1H), 7.38–7.29 (comp, 6H), 7.28–7.21 (comp, 4H), 7.21–7.16 (comp, 2H), 6.89–6.83 (m, 1H), 6.79–6.74 (m, 1H), 6.19 (d, *J* = 7.4 Hz, 1H), 4.52 (br s, 1 NH), 2.49–2.45 (m, 1H), 1.94–1.90 (m, 1H), 1.78–1.49 (m, 6H), 1.37–1.23 (m, 2H), 1.09–0.99 (m, 1H); **<sup>13</sup>C NMR (101 MHz, CDCl<sub>3</sub>)** δ 196.0, 146.1, 142.2, 138.2, 138.0, 133.1, 132.4, 128.8, 128.7, 128.4, 128.3 (X2), 127.9(X2), 127.3, 126.8, 125.7, 125.3, 121.9, 119.1, 111.2, 88.1, 52.8, 33.7, 32.6, 25.7, 22.8, 22.6; **HRMS (ESI, m/z)** calcd for C<sub>34</sub>H<sub>30</sub>NO [M + H]<sup>+</sup> 468.2327 found 468.2313.

phenyl(3''-phenyldispiro[cyclopentane-1,3'-indoline-2',1''-inden]-2''-yl)methanone (**5p**):

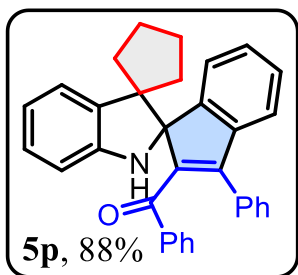

**Yield** 88% (80 mg); **Yellow solid**; **eluent composition** petroleum ether/ethyl acetate = 19:1; **mp** 172-174 °C; **<sup>1</sup>H NMR (400 MHz, CDCl<sub>3</sub>)** δ 7.50 (d, *J* = 7.3 Hz, 1H), 7.44–7.32 (comp, 7H), 7.32–7.22 (comp, 4H), 7.21–7.14 (comp, 2H), 6.98–6.93 (m, 1H), 6.86–6.78 (m, 1H), 6.76–6.70 (m, 1H), 6.13 (d, *J* = 7.6 Hz, 1H), 4.43 (br s, 1 NH), 2.19–2.13 (m, 1H), 2.02–1.91 (m, 1H), 1.83–1.63 (m, 4H), 1.62–1.42 (m, 2H); **<sup>13</sup>C NMR (101 MHz, CDCl<sub>3</sub>)** δ 195.9, 148.2, 145.8, 145.7, 145.3, 142.3, 139.6, 138.3, 133.1, 132.3, 128.7, 128.5, 128.4, 128.26, 128.34, 127.9, 127.4, 126.9, 125.2, 122.7, 121.8, 119.5, 110.6, 86.5, 59.6, 37.7, 33.5, 24.1, 23.6; **HRMS (ESI, m/z)** calcd for C<sub>33</sub>H<sub>28</sub>NO [M + H]<sup>+</sup> 454.2171 found 454.2159.

**$^1\text{H}$ ,  $^{13}\text{C}$  and  $^{19}\text{F}$  NMR spectra of spiro-products:**

**$^1\text{H}$  NMR of 3a (400 MHz,  $\text{CDCl}_3$ ):**

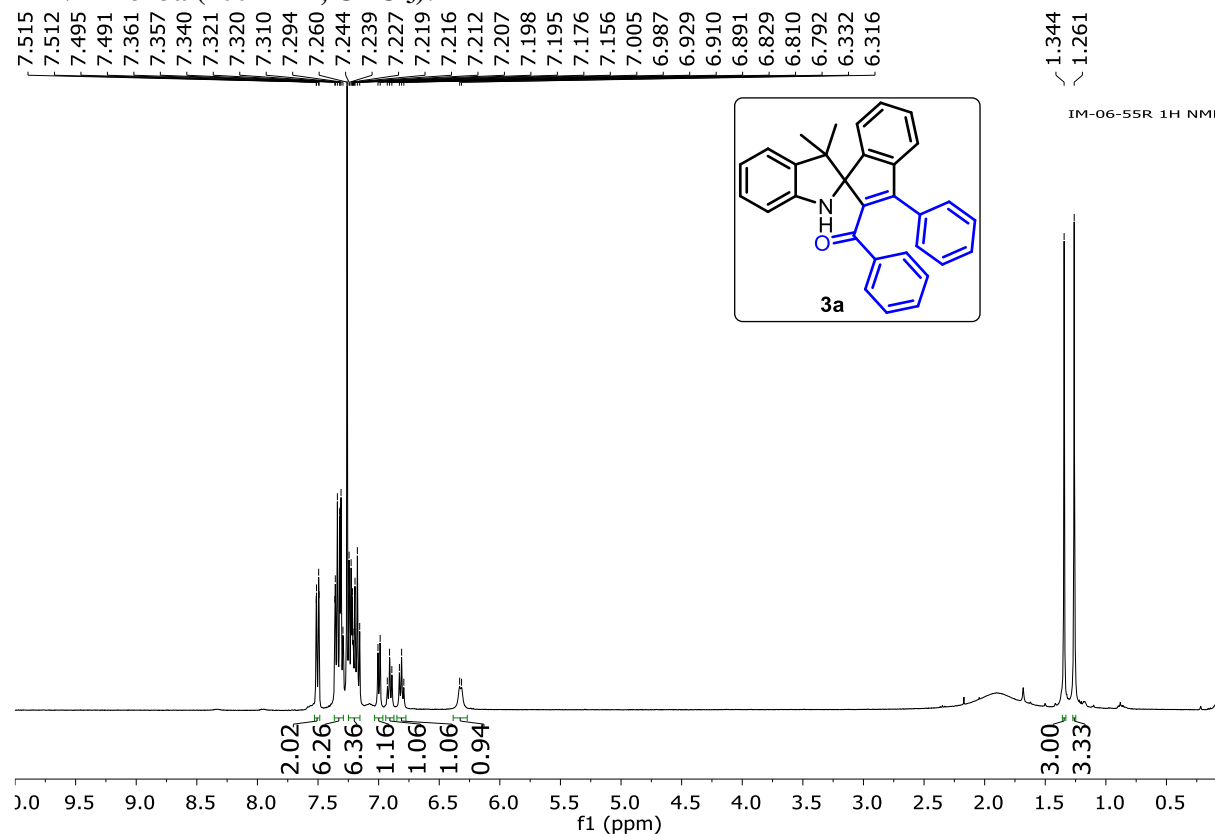

**$^{13}\text{C}\{^1\text{H}\}$  NMR of 3a (100 MHz,  $\text{CDCl}_3$ ):**

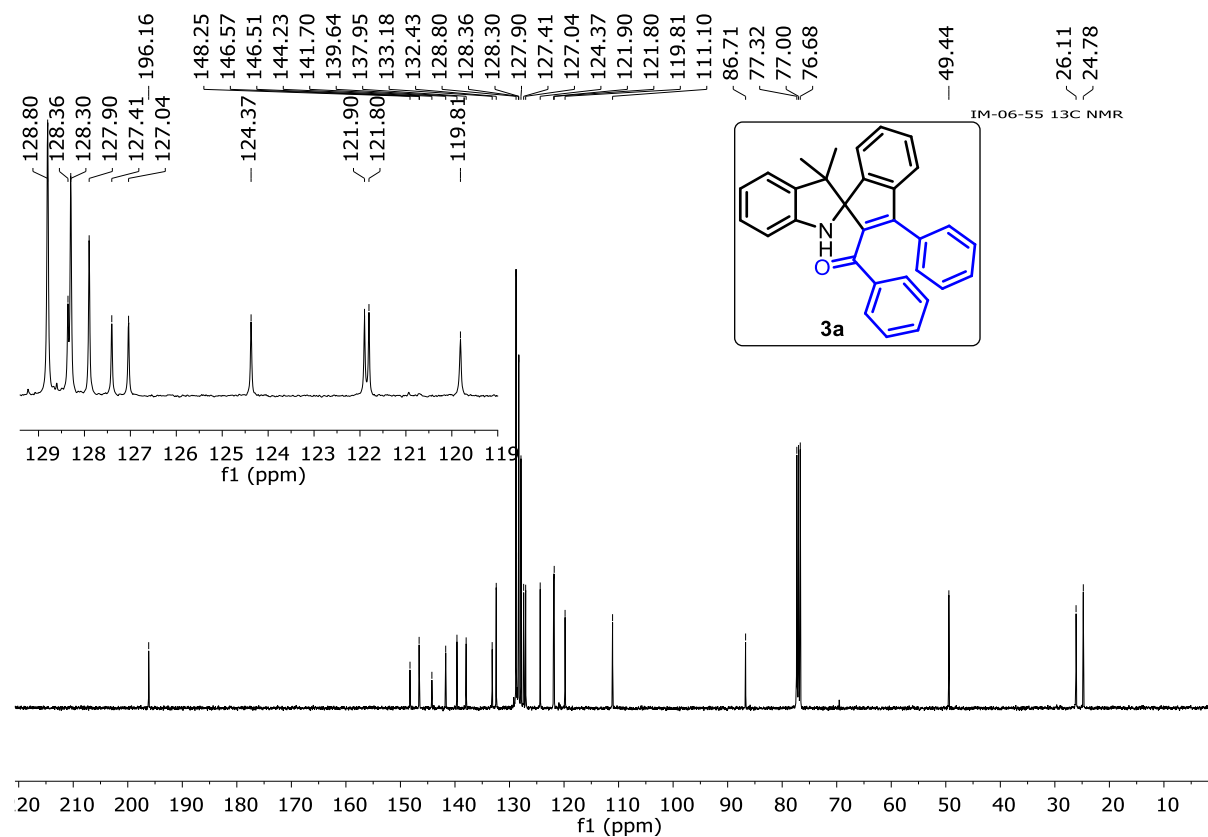

**<sup>1</sup>H NMR of 3b (400 MHz, CDCl<sub>3</sub>):**

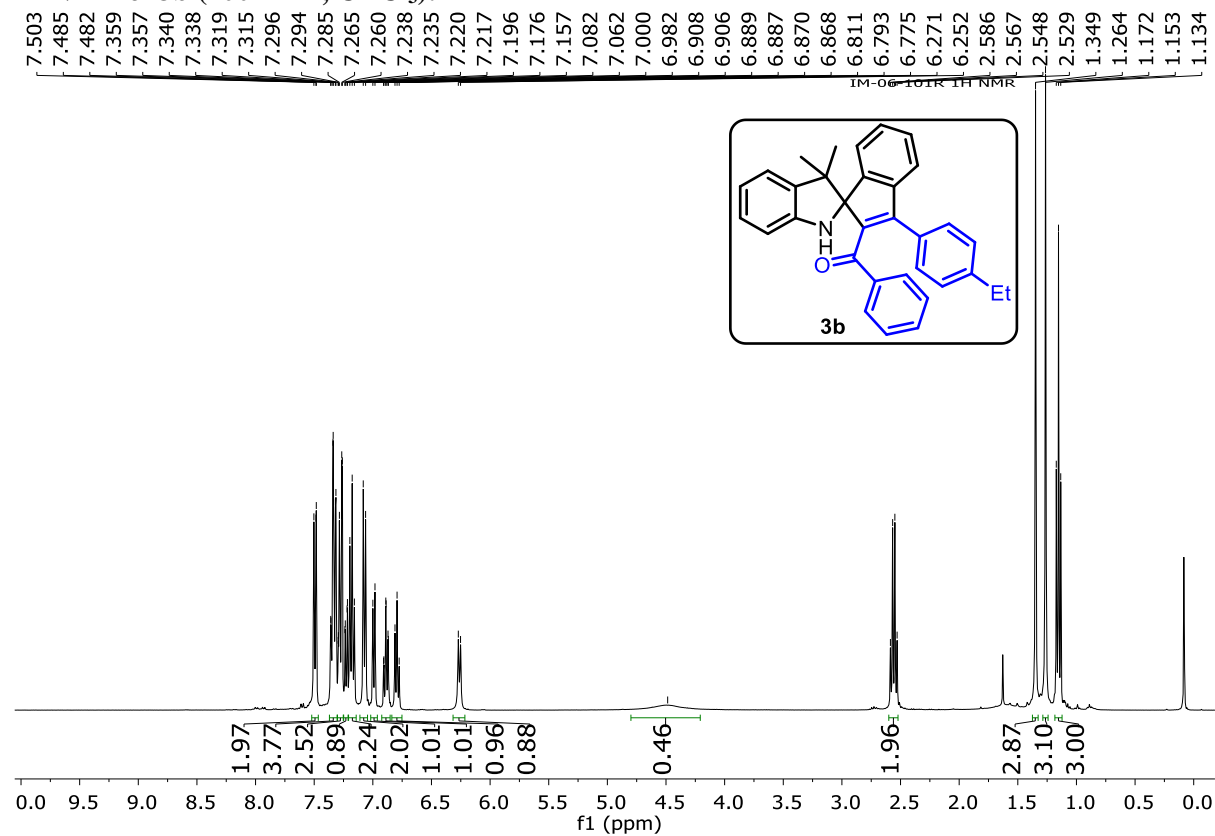

**<sup>13</sup>C{<sup>1</sup>H} NMR of 3b (101 MHz, CDCl<sub>3</sub>):**

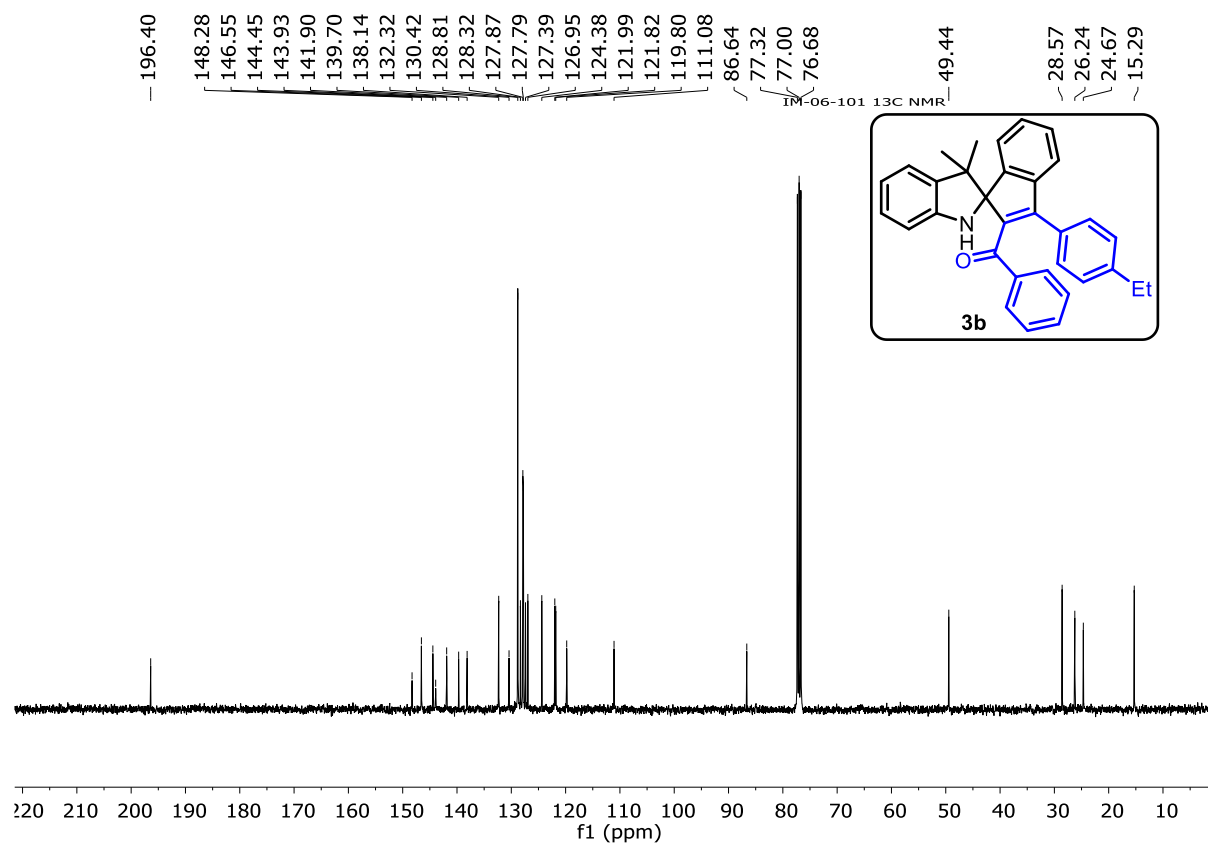

**<sup>1</sup>H NMR of 3c (400 MHz, CDCl<sub>3</sub>):**

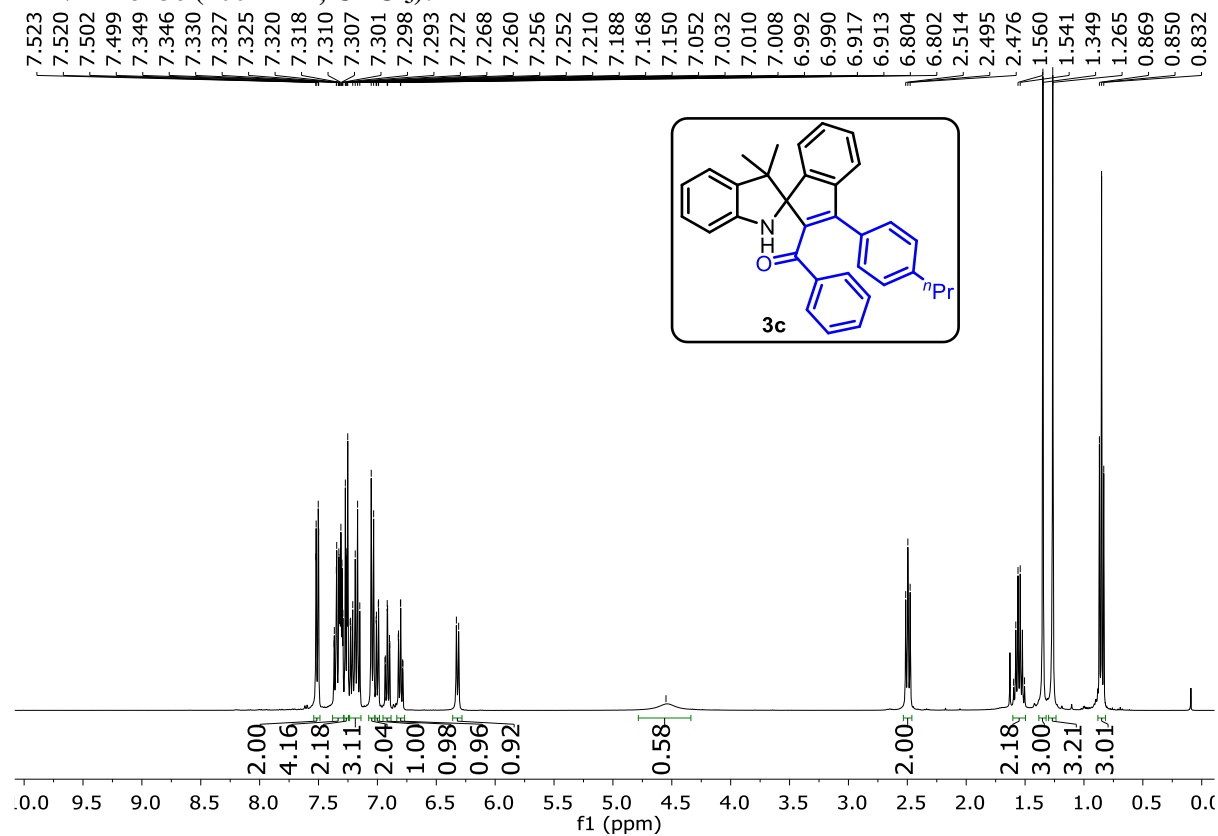

**<sup>13</sup>C{<sup>1</sup>H} NMR of 3c (101 MHz, CDCl<sub>3</sub>):**

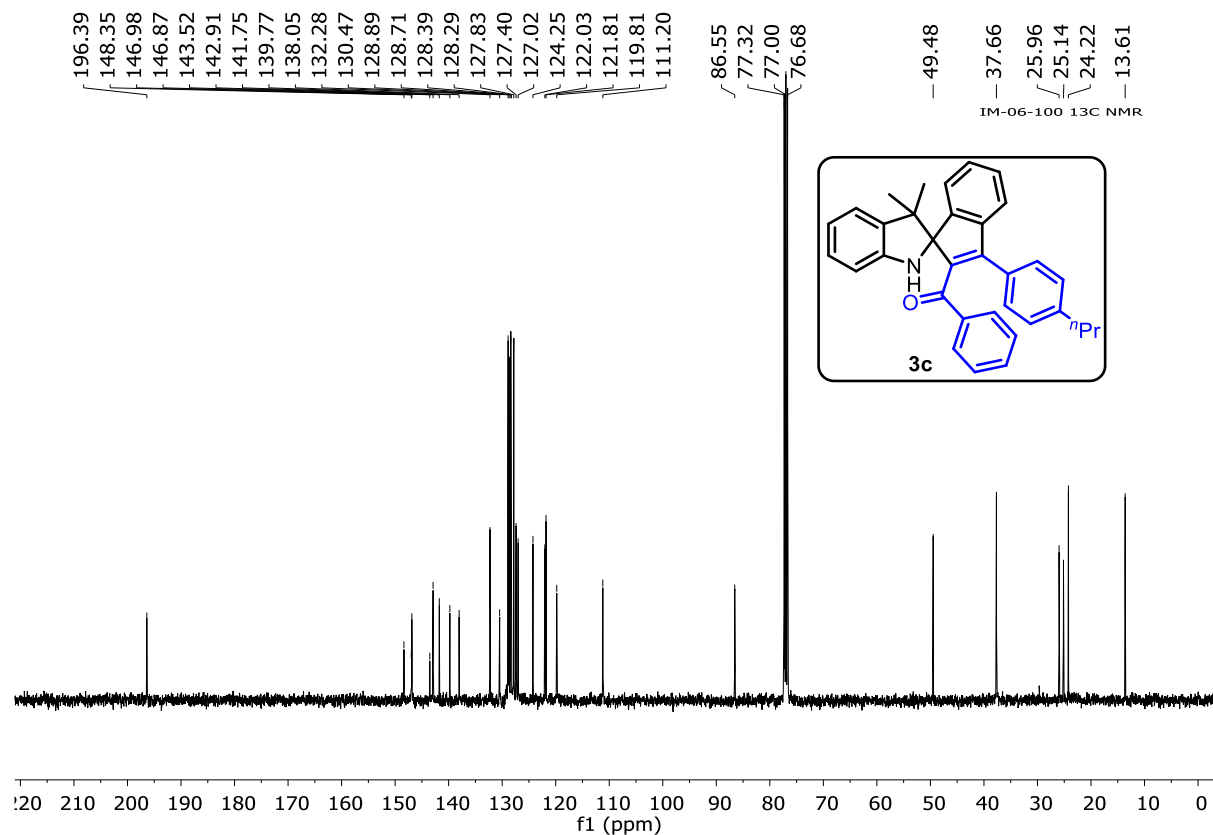

**<sup>1</sup>H NMR of 3d (400 MHz, CDCl<sub>3</sub>):**

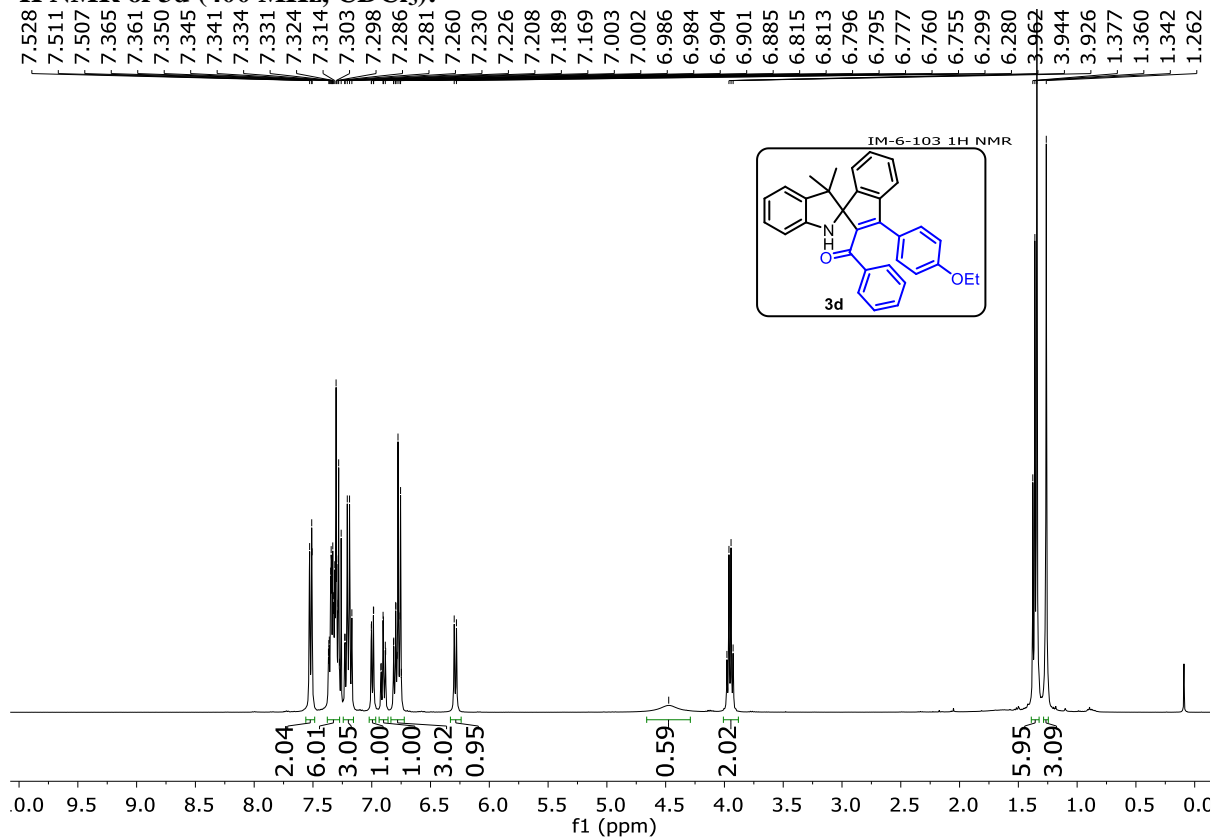

**<sup>13</sup>C{<sup>1</sup>H} NMR of 3d (101 MHz, CDCl<sub>3</sub>):**

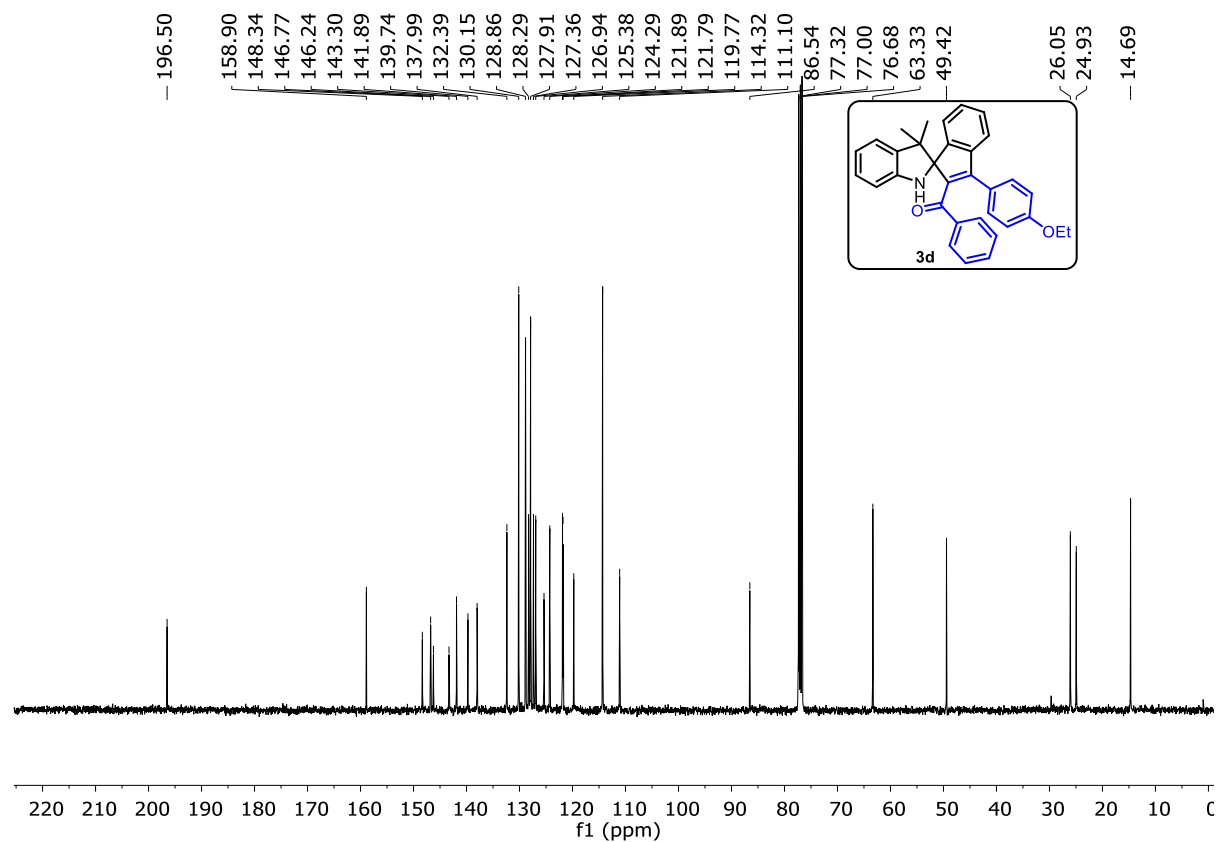

**$^1\text{H}$  NMR of 3e (400 MHz,  $\text{CDCl}_3$ ):**

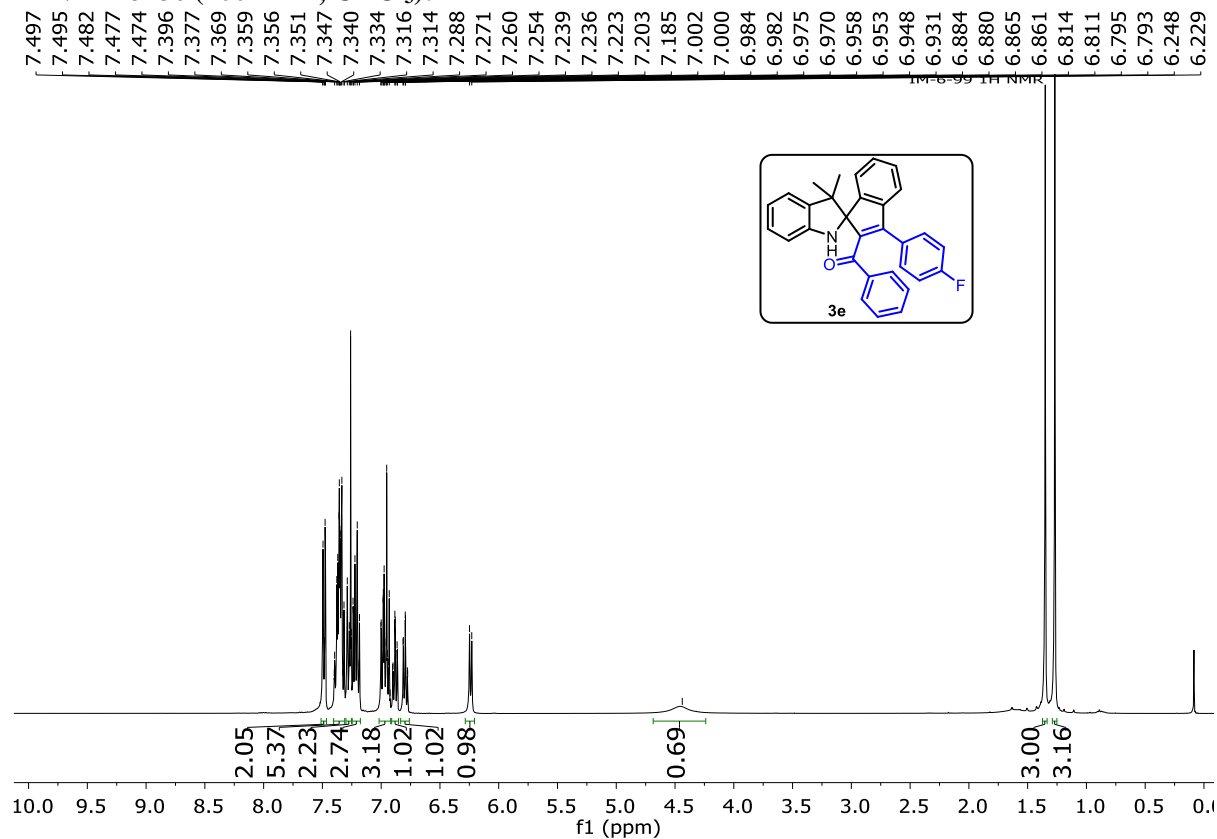

**$^{13}\text{C}\{^1\text{H}\}$  NMR of 3e (101 MHz,  $\text{CDCl}_3$ ):**

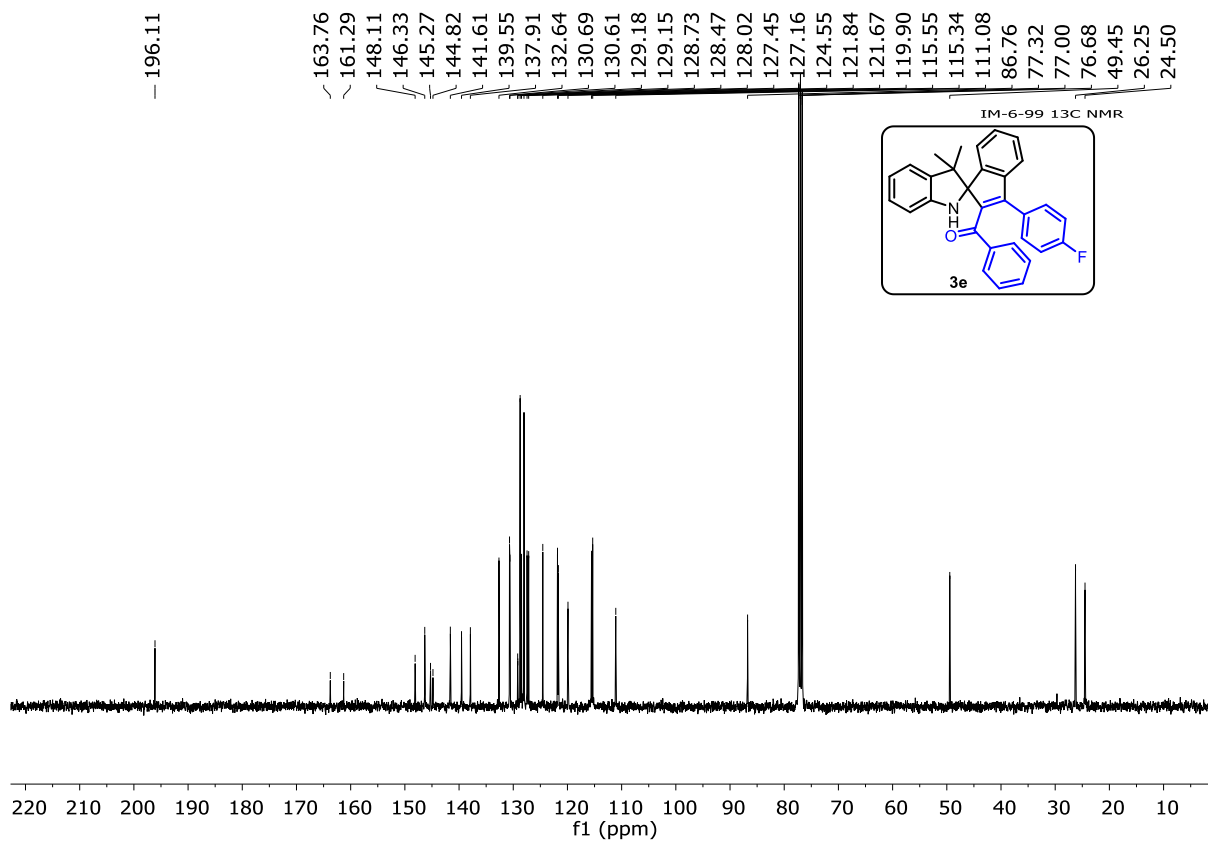

**$^{19}\text{F}$  NMR of 3e (376 MHz,  $\text{CDCl}_3$ ):**

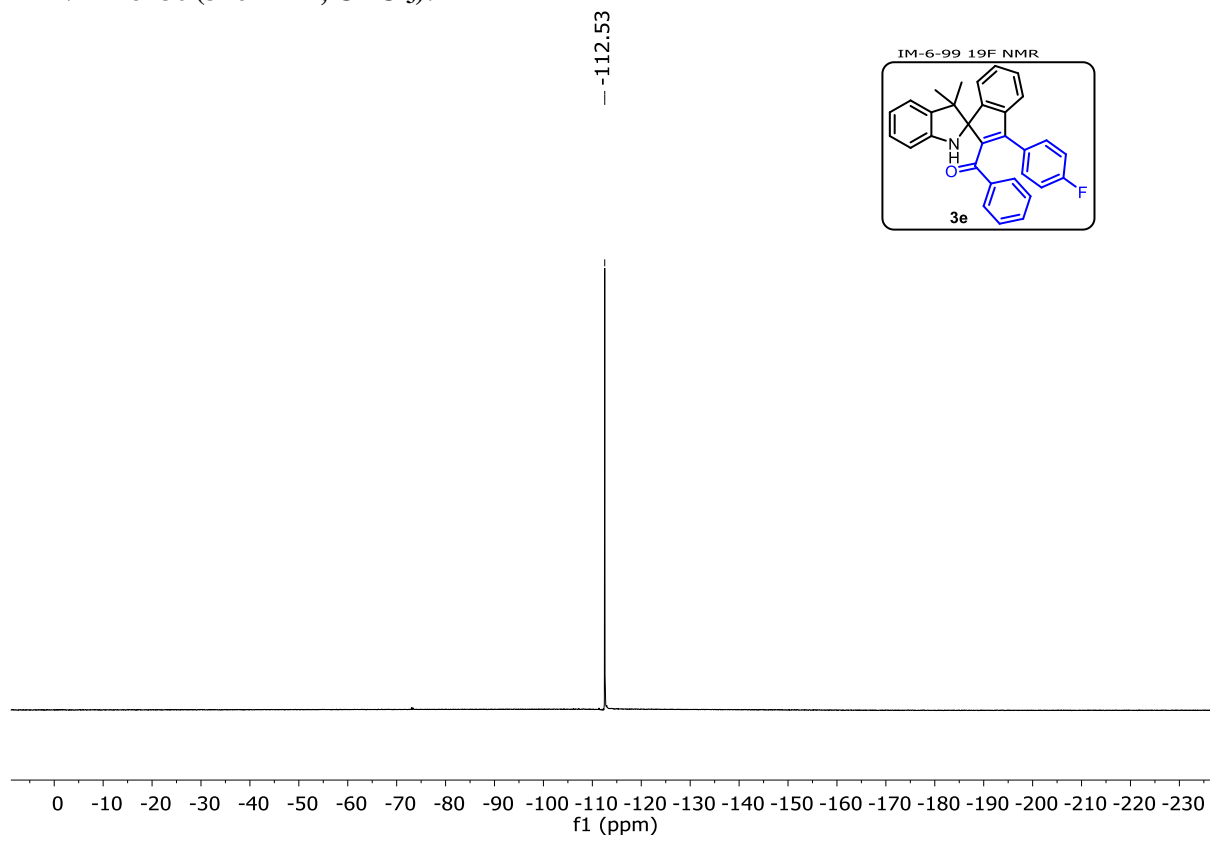

**<sup>1</sup>H NMR of 3f (400 MHz, CDCl<sub>3</sub>):**

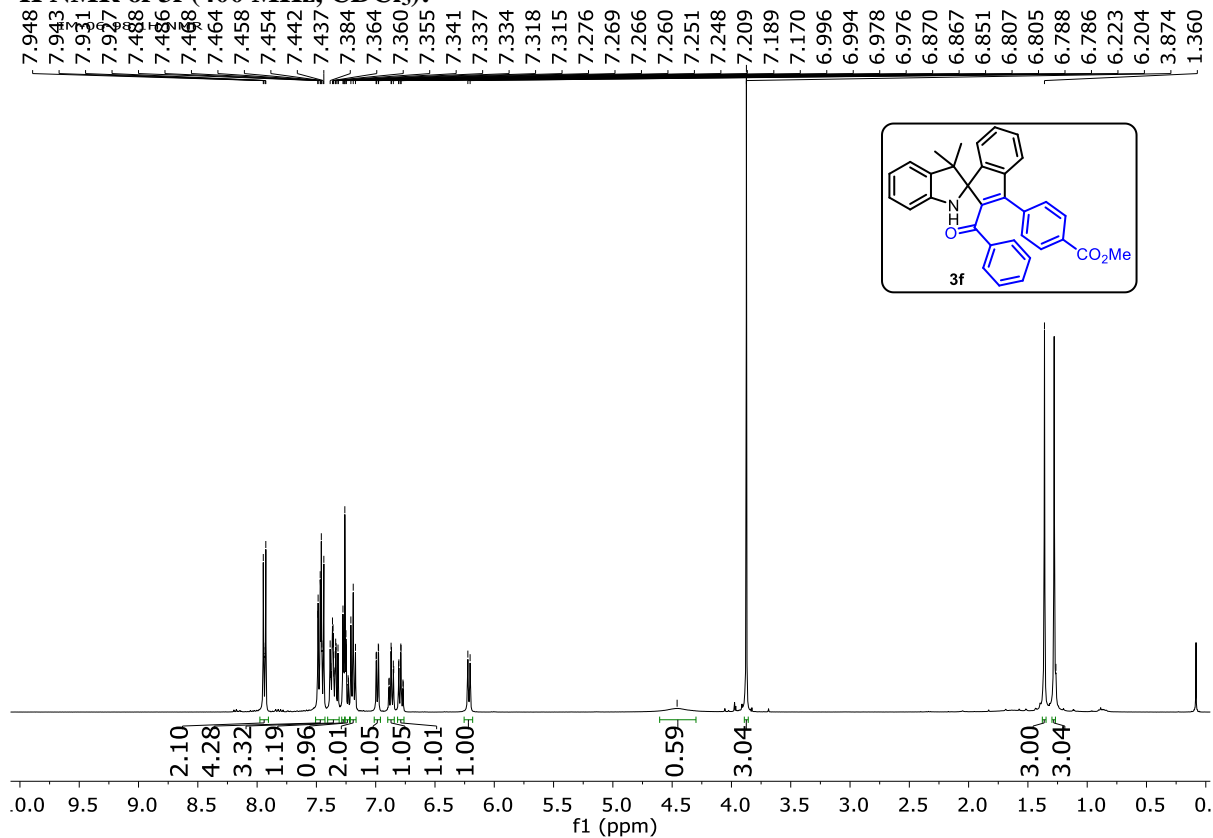

**<sup>13</sup>C{<sup>1</sup>H} NMR of 3f (101 MHz, CDCl<sub>3</sub>):**

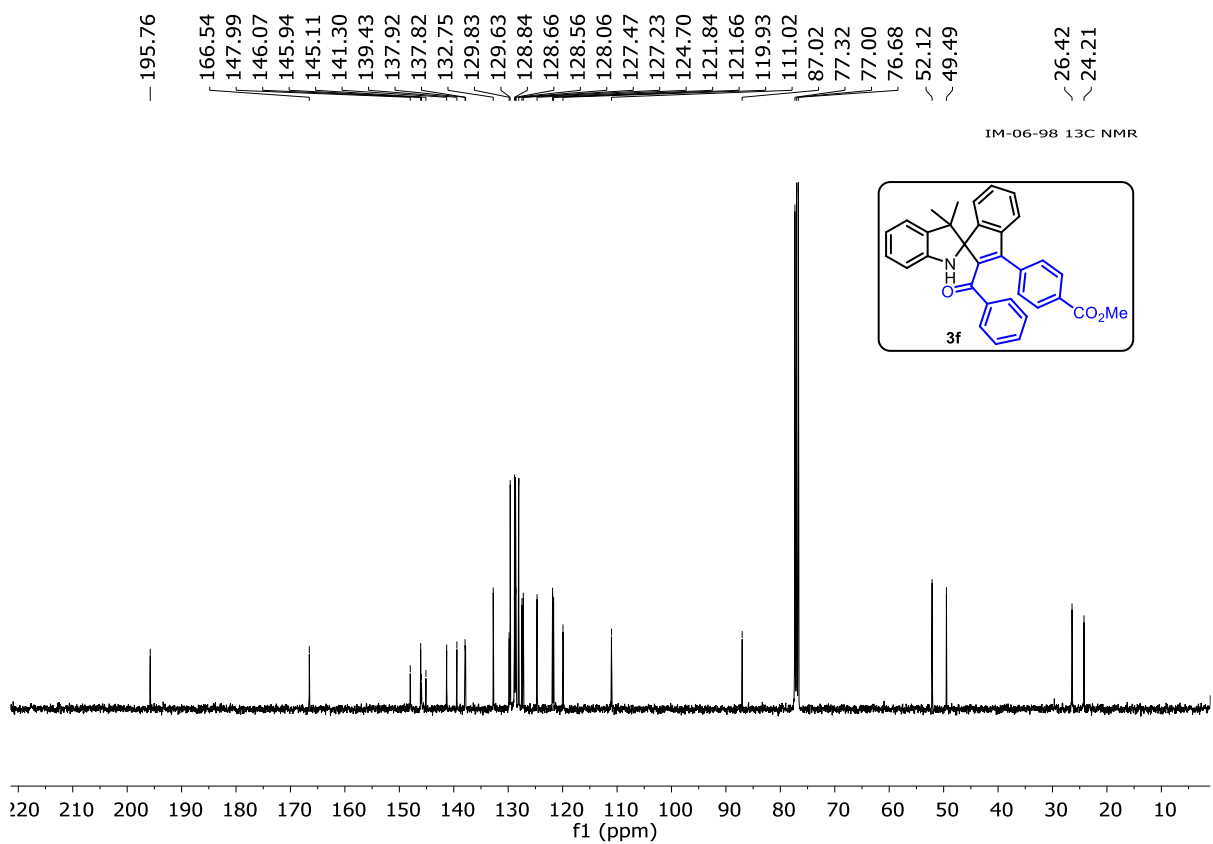

**$^1\text{H}$  NMR of 3g (400 MHz,  $\text{CDCl}_3$ ):**

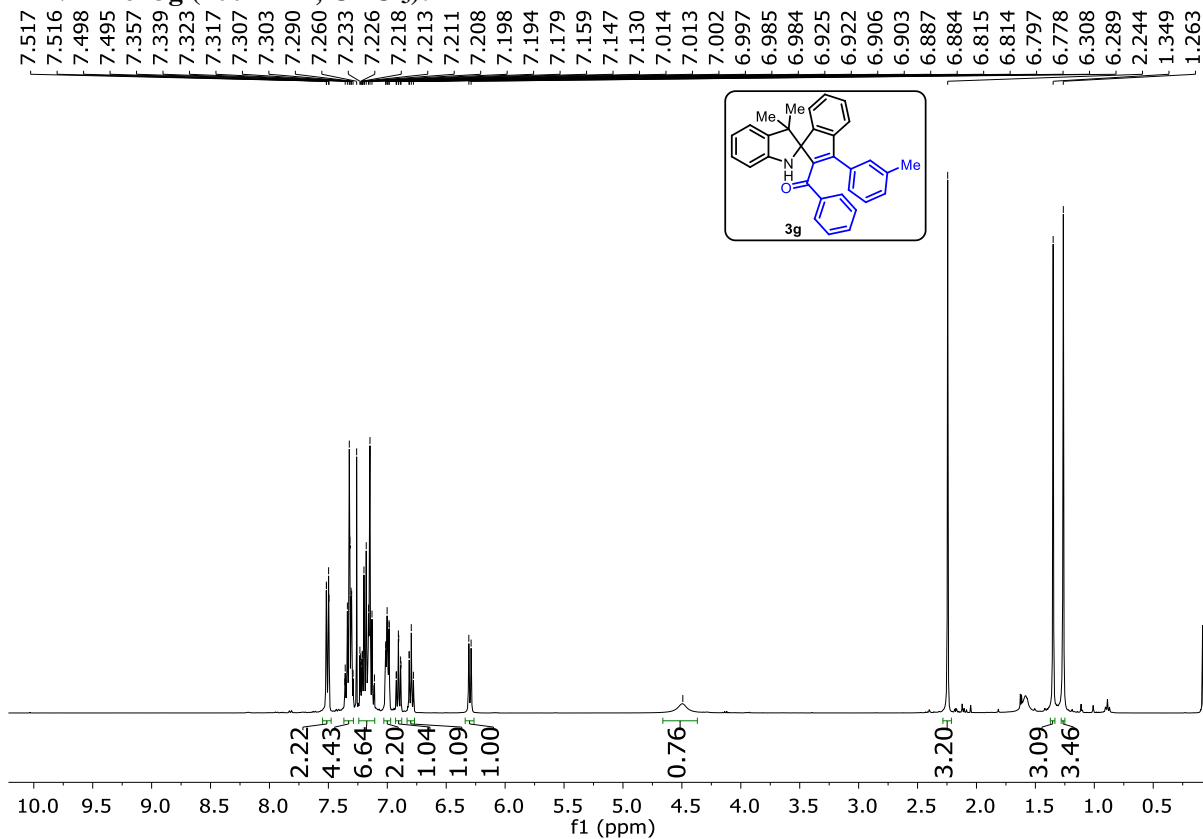

**$^{13}\text{C}\{^1\text{H}\}$  NMR of 3g (101 MHz,  $\text{CDCl}_3$ ):**

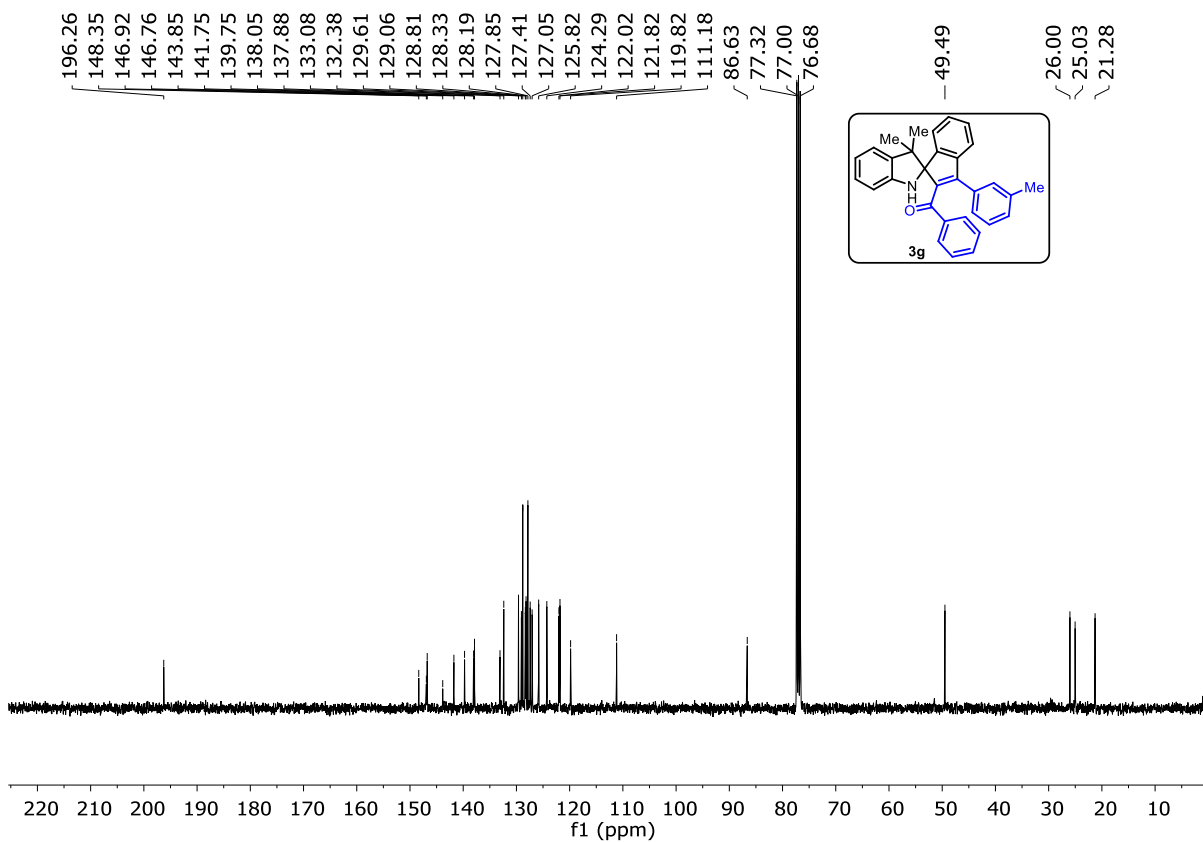

**<sup>1</sup>H NMR of 3h and 3h' (400 MHz, CDCl<sub>3</sub>):**

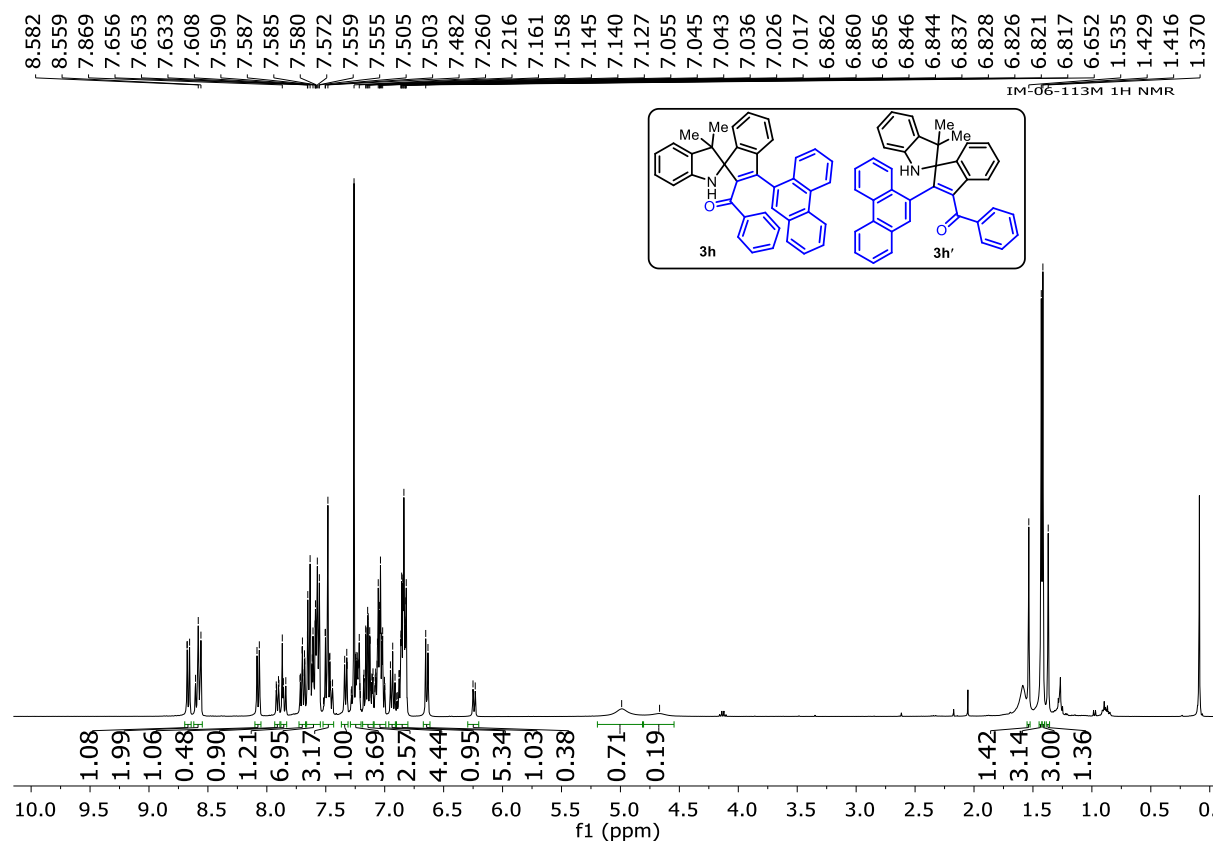

**<sup>13</sup>C{<sup>1</sup>H} NMR of 3h and 3h' (101 MHz, CDCl<sub>3</sub>):**

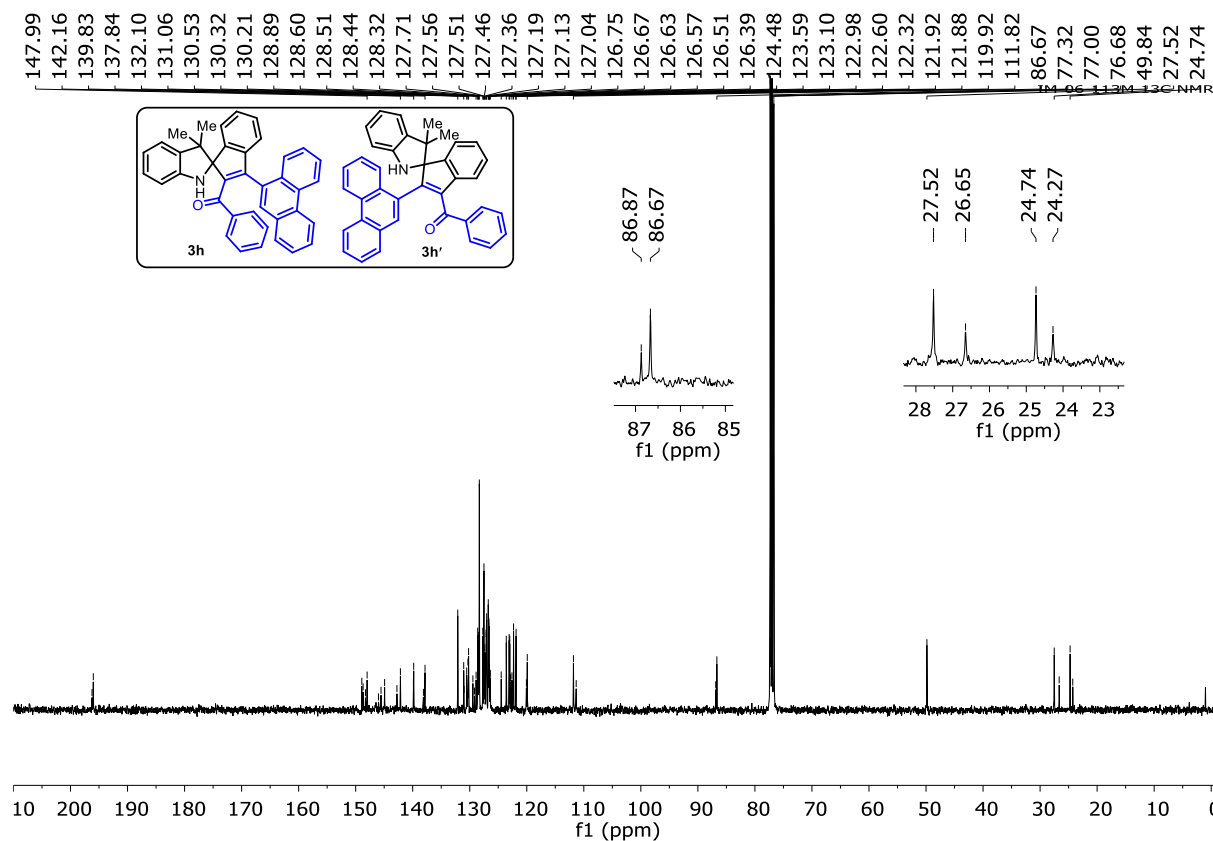

**$^1\text{H}$  NMR of 3i (400 MHz,  $\text{CDCl}_3$ ):**

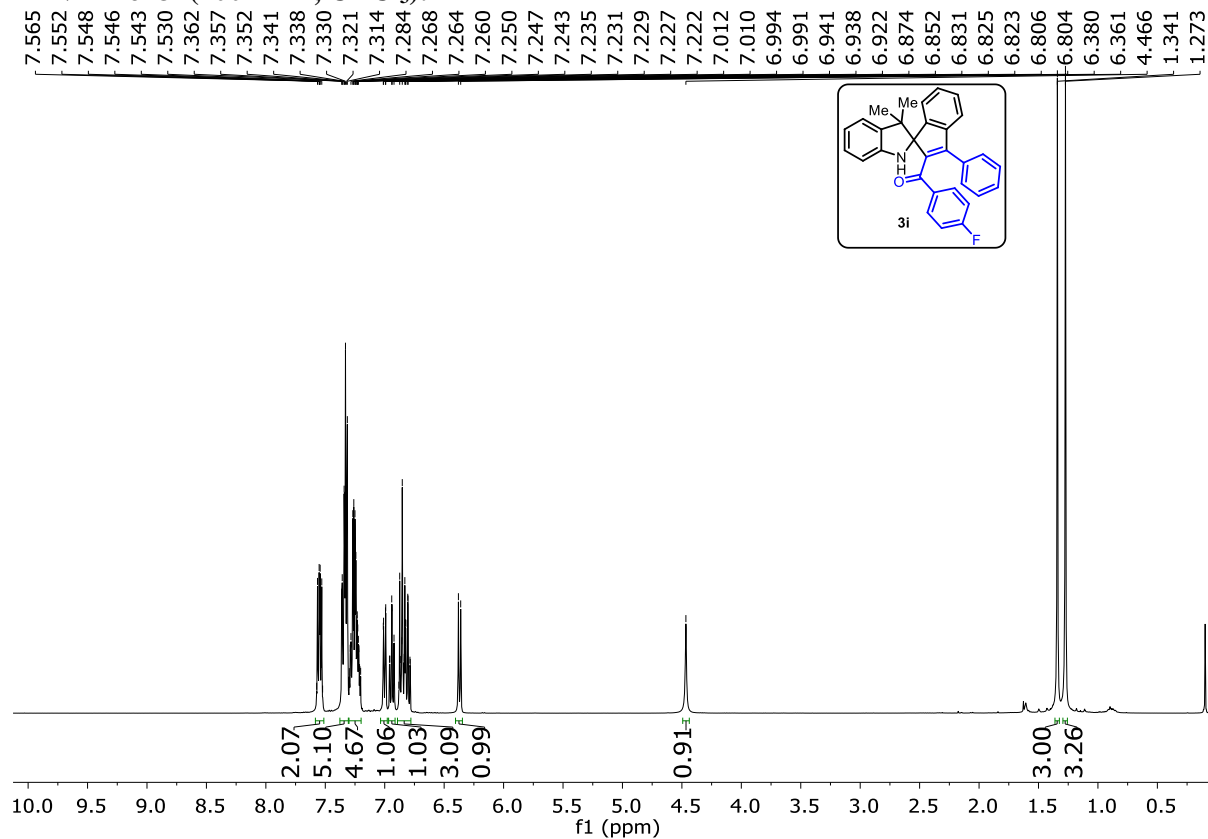

**$^{13}\text{C}\{^1\text{H}\}$  NMR of 3i (101 MHz,  $\text{CDCl}_3$ ):**

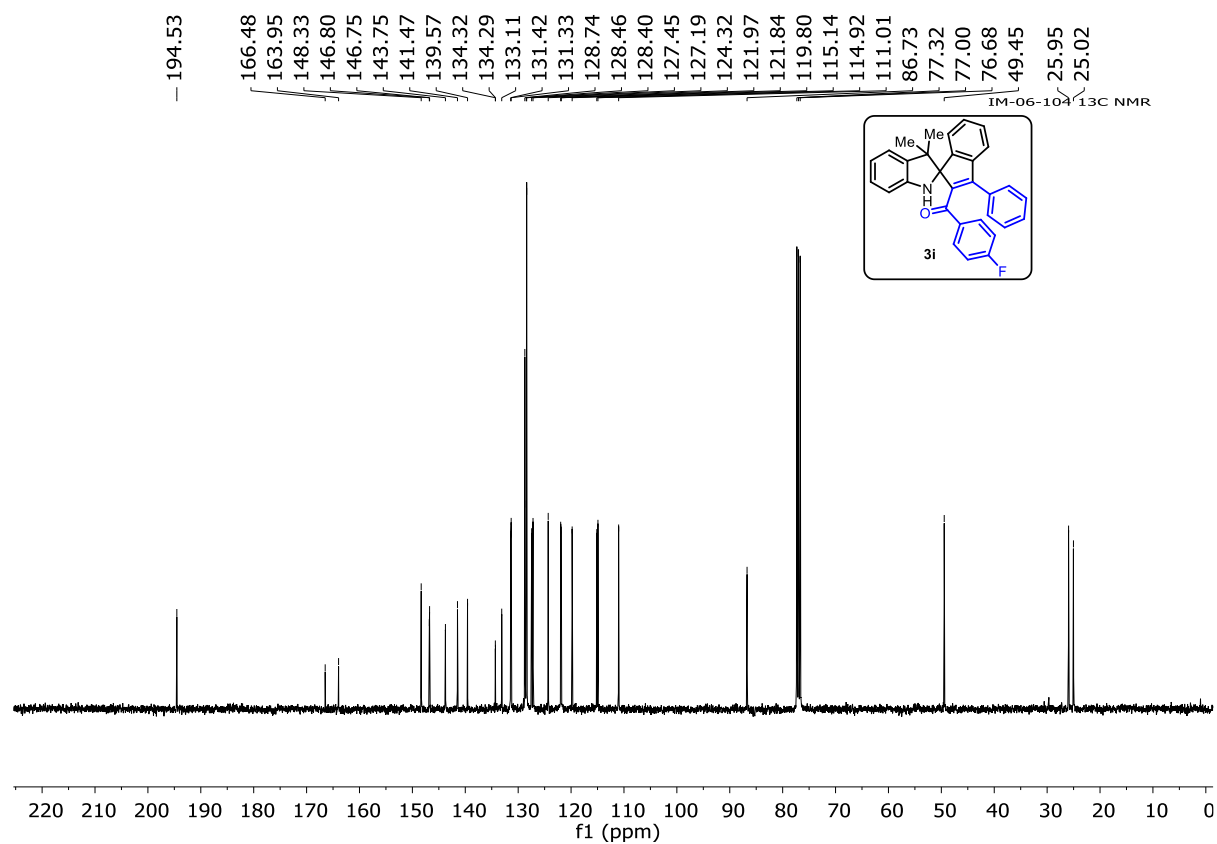

**$^{19}\text{F}$  NMR of 3i (376 MHz,  $\text{CDCl}_3$ ):**

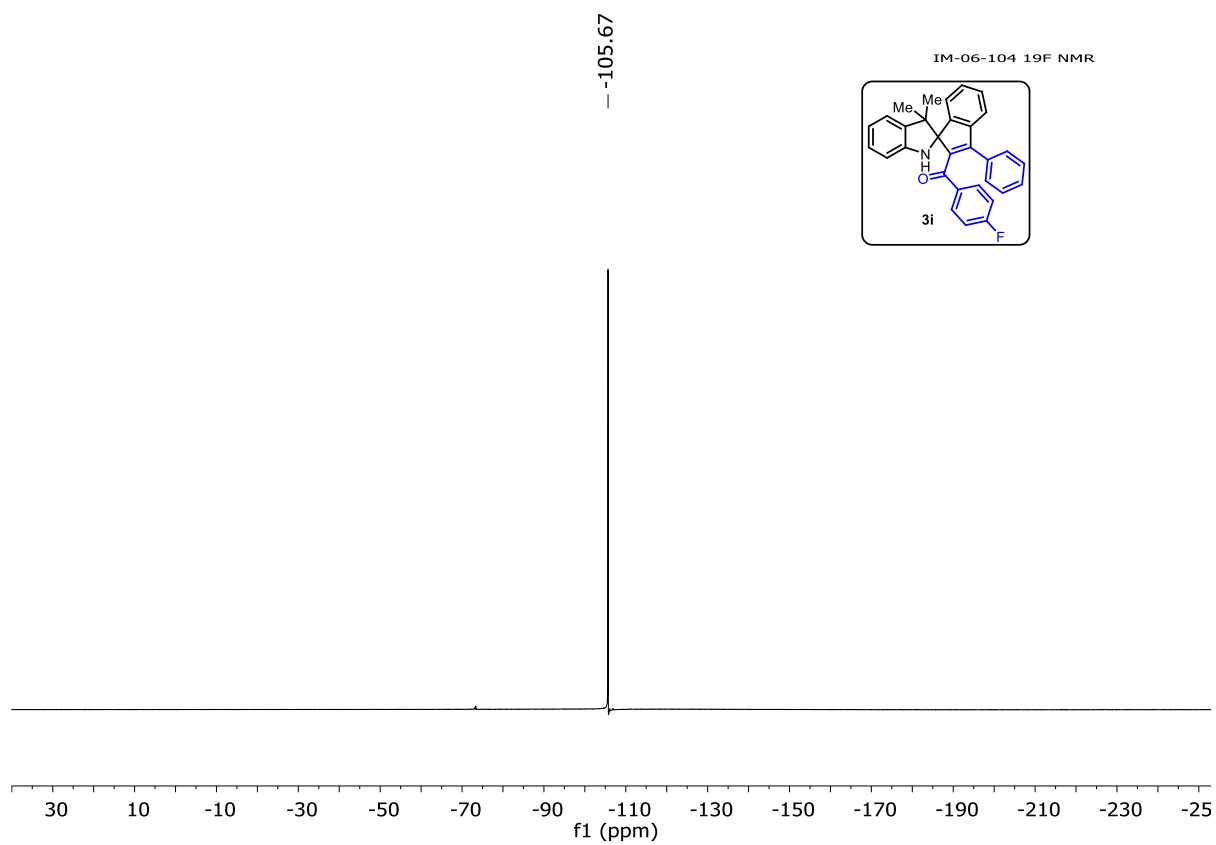

**$^1\text{H}$  NMR of 3j (400 MHz,  $\text{CDCl}_3$ ):**

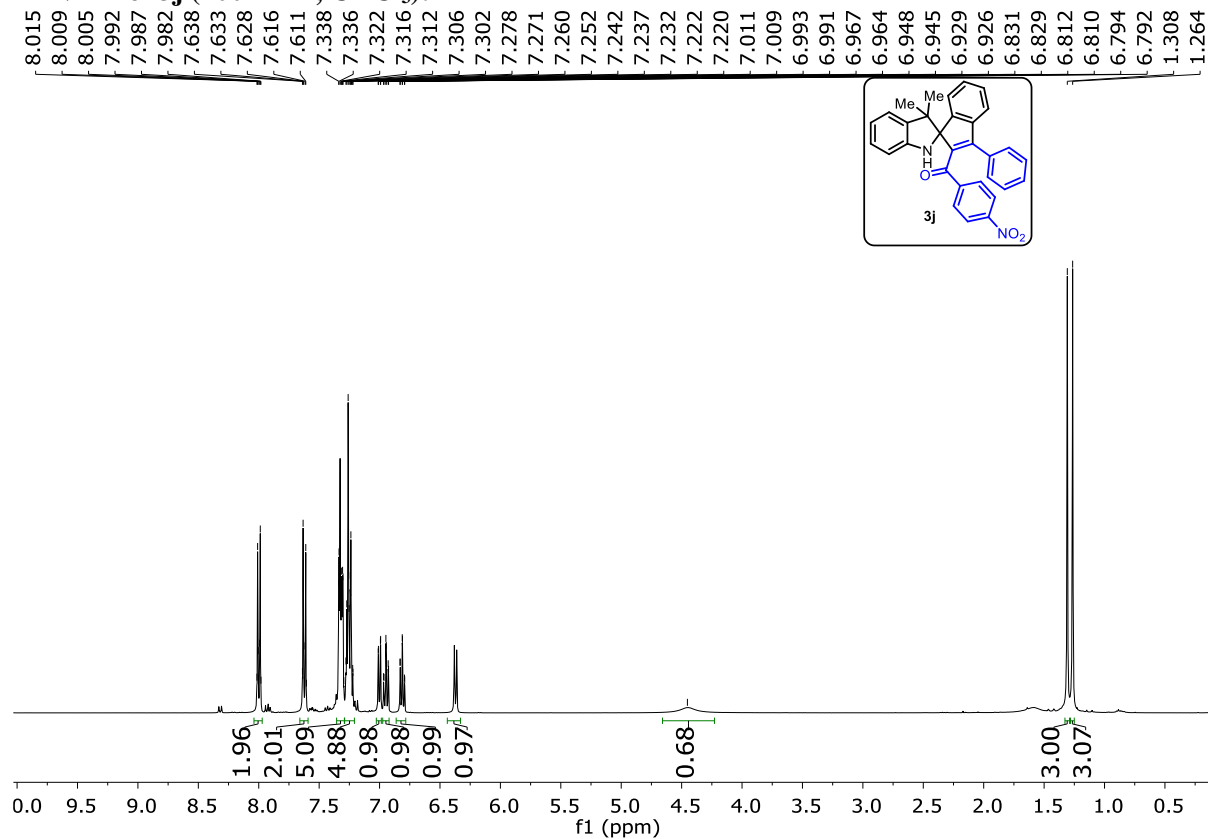

**$^{13}\text{C}\{^1\text{H}\}$  NMR of 3j (101 MHz,  $\text{CDCl}_3$ ):**

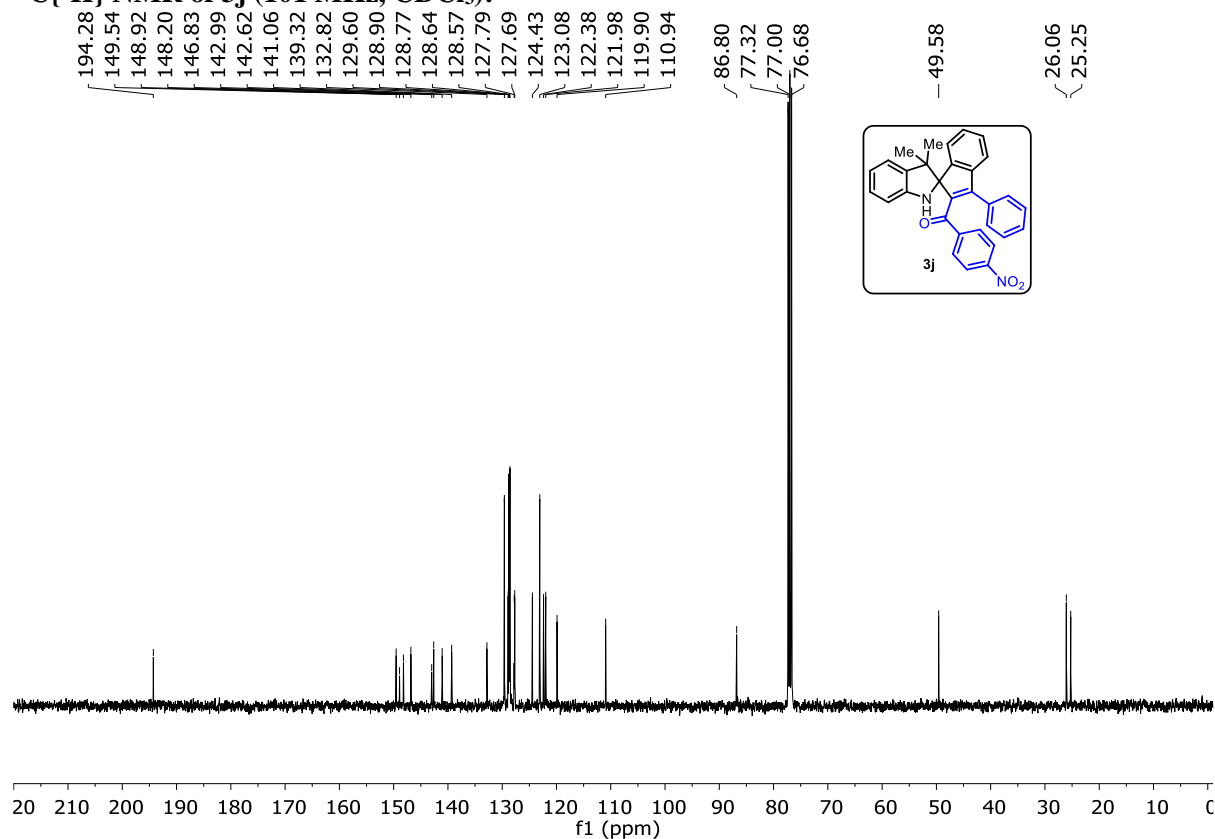

**<sup>1</sup>H NMR of 3k (400 MHz, CDCl<sub>3</sub>):**

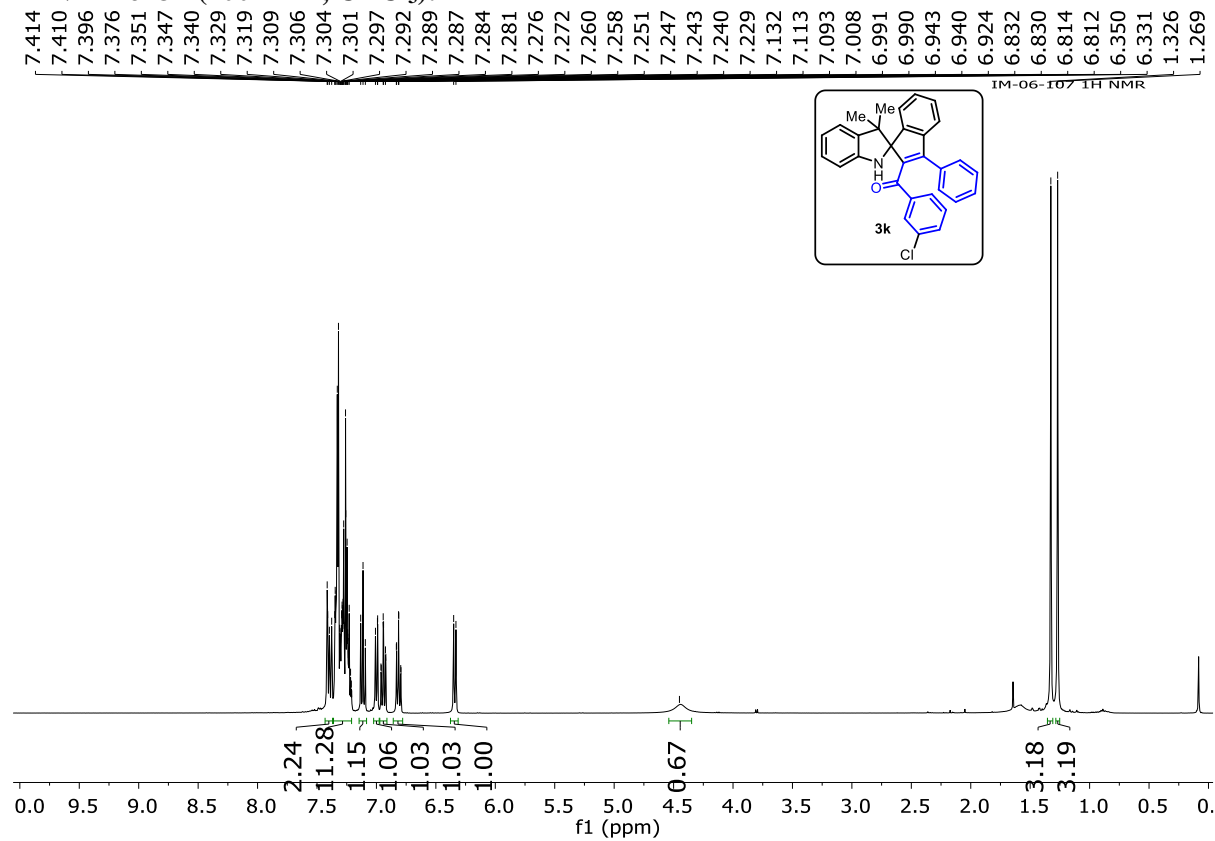

**<sup>13</sup>C{<sup>1</sup>H} NMR of 3k (101 MHz, CDCl<sub>3</sub>):**

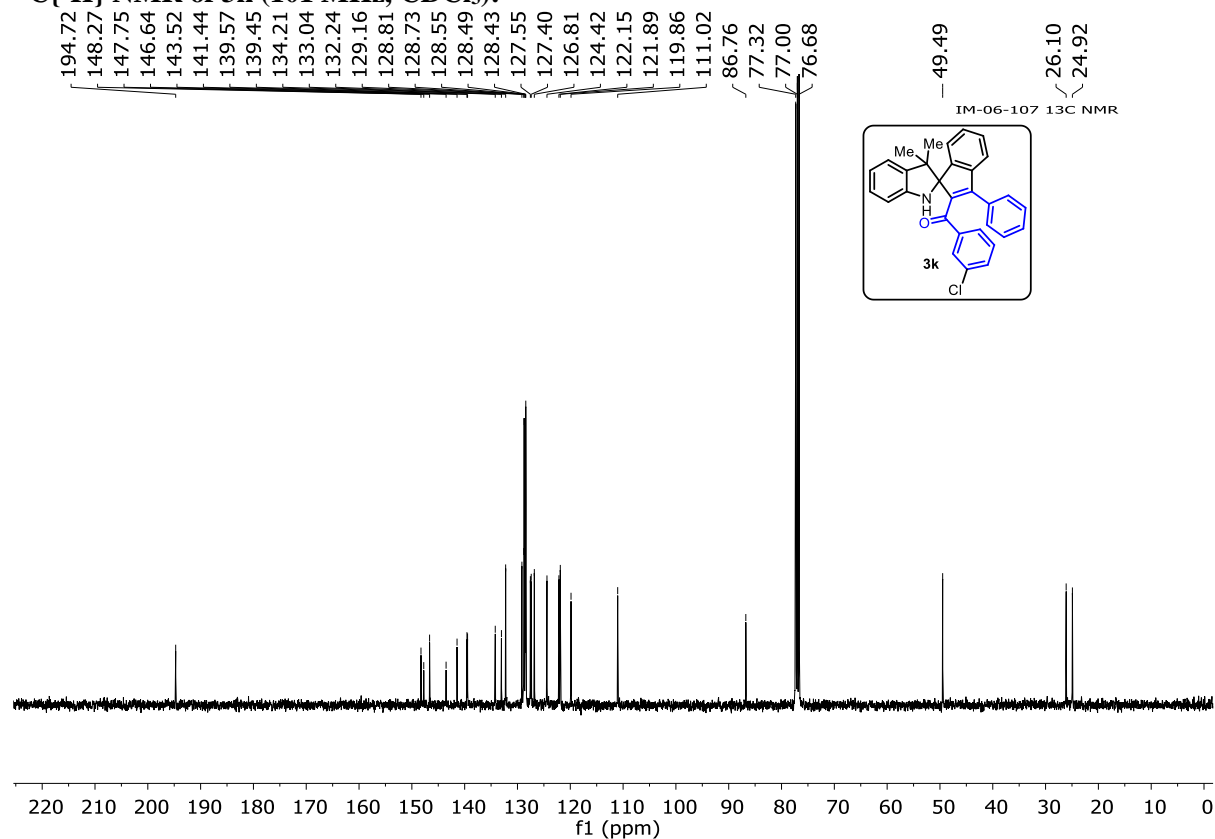

**<sup>1</sup>H NMR of 3l (400 MHz, CDCl<sub>3</sub>):**

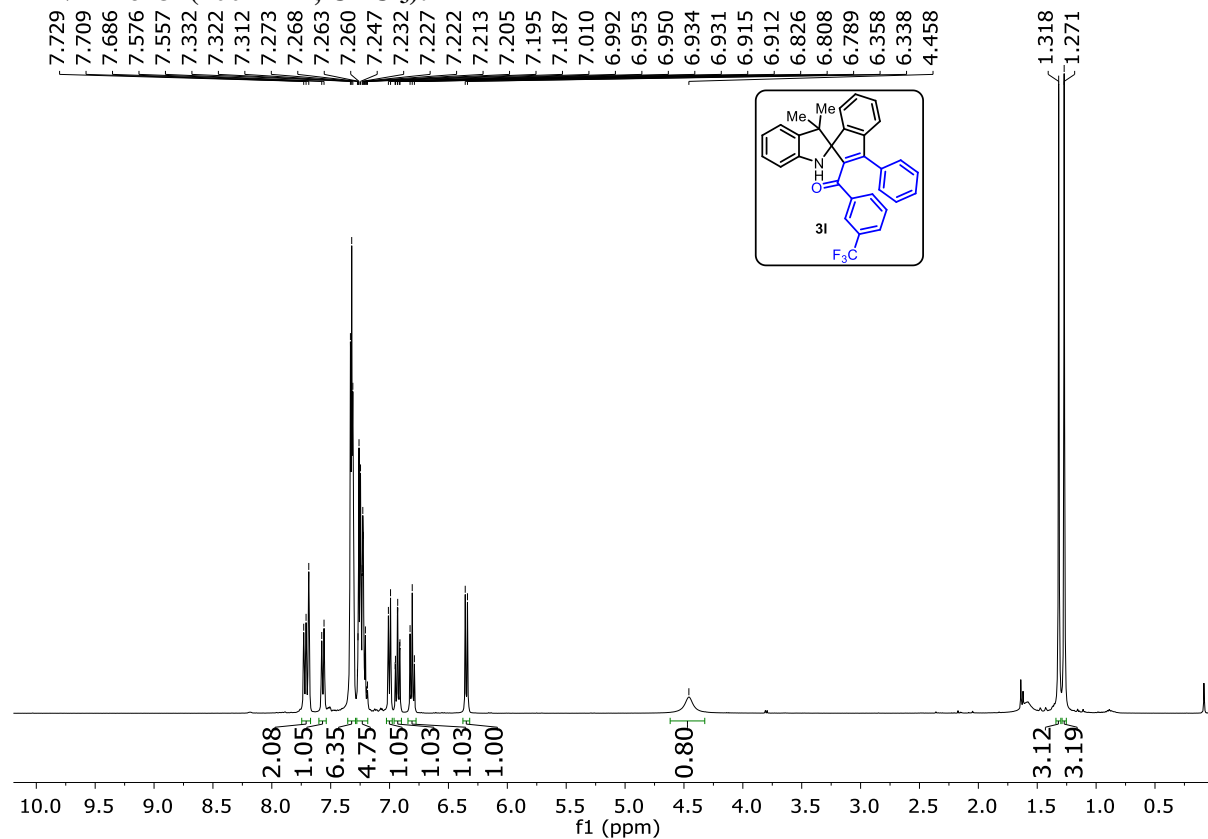

**<sup>13</sup>C{<sup>1</sup>H} NMR of 3l (101 MHz, CDCl<sub>3</sub>):**

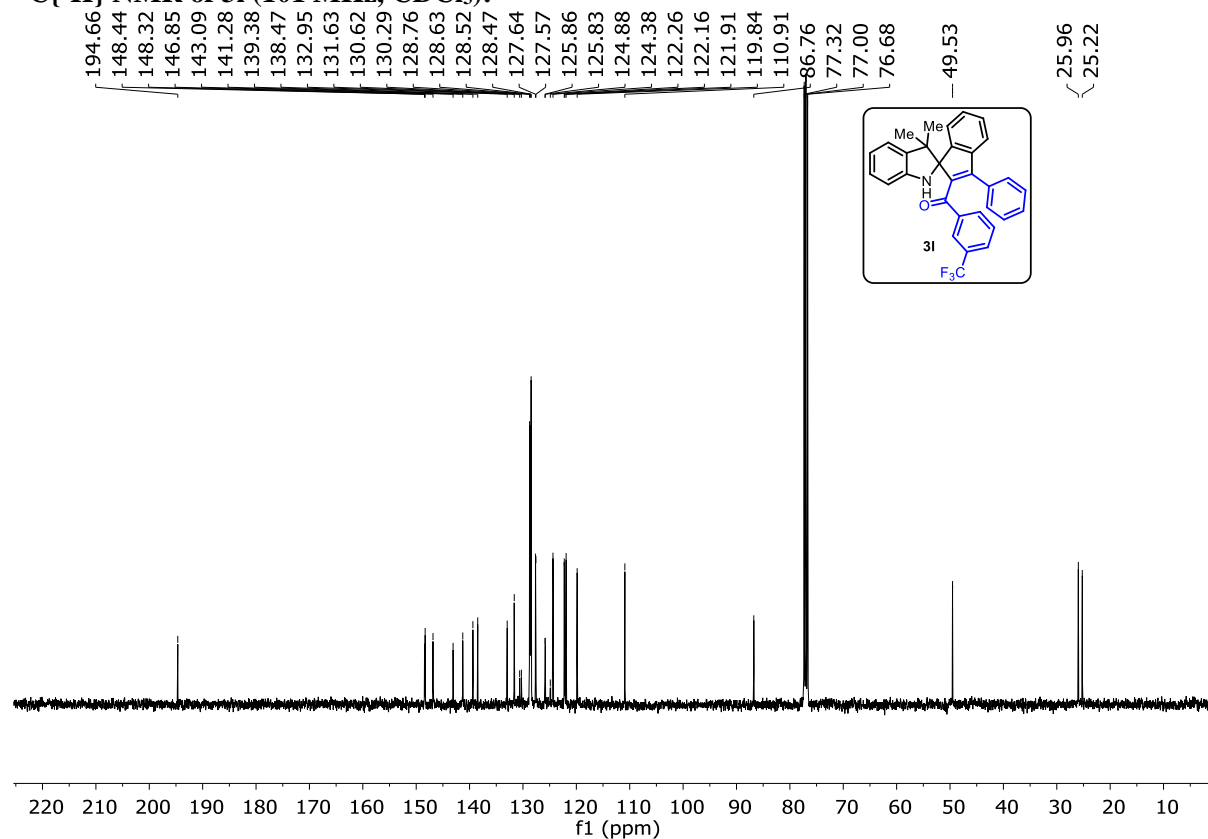

**$^{19}\text{F}$  NMR of 3l (376 MHz,  $\text{CDCl}_3$ ):**

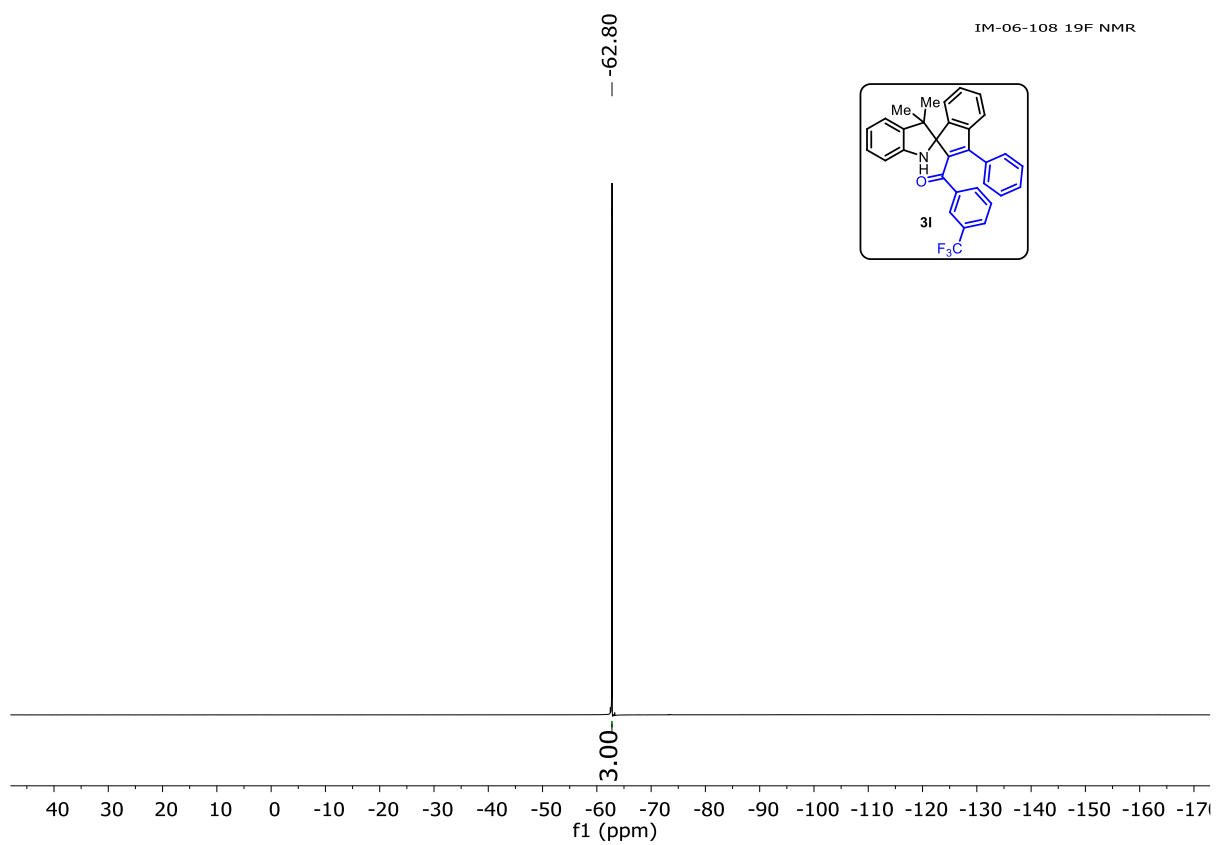

**<sup>1</sup>H NMR of 3m (400 MHz, CDCl<sub>3</sub>):**

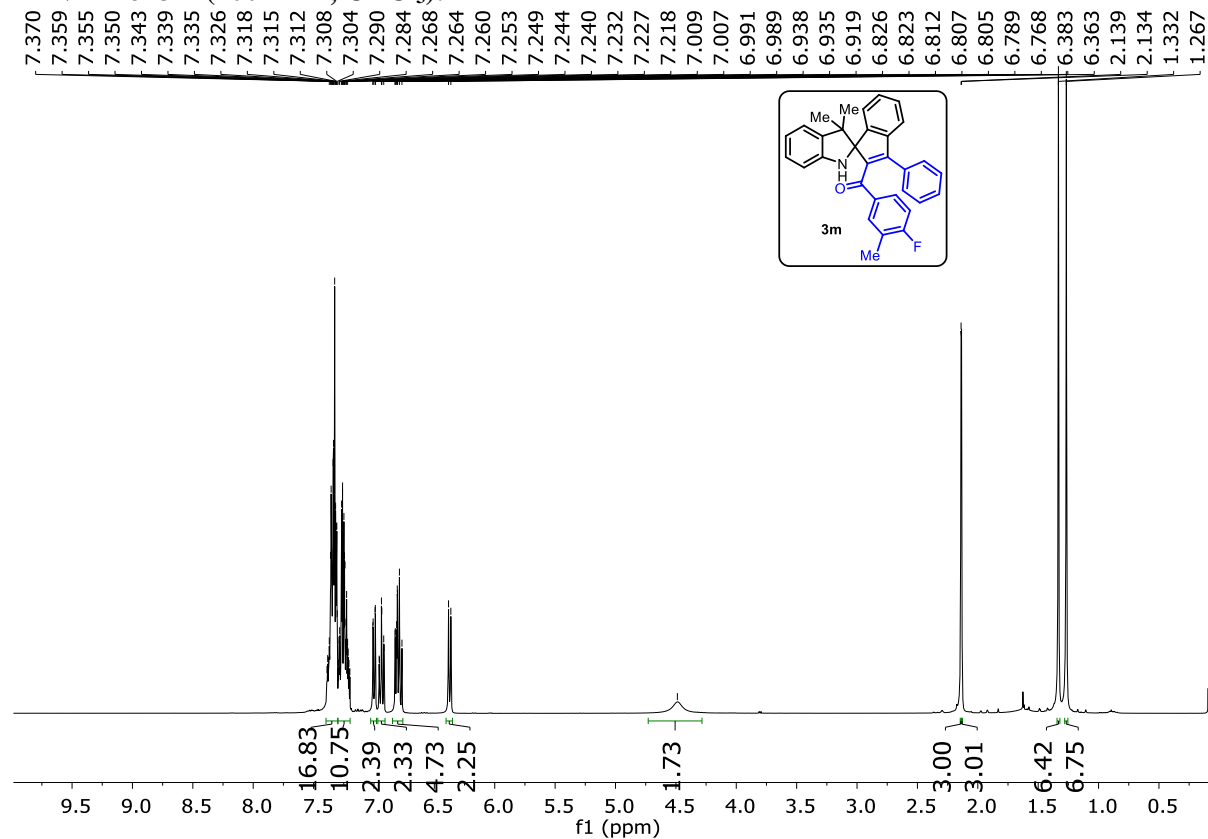

**<sup>13</sup>C{<sup>1</sup>H} NMR of 3m (100 MHz, CDCl<sub>3</sub>):**

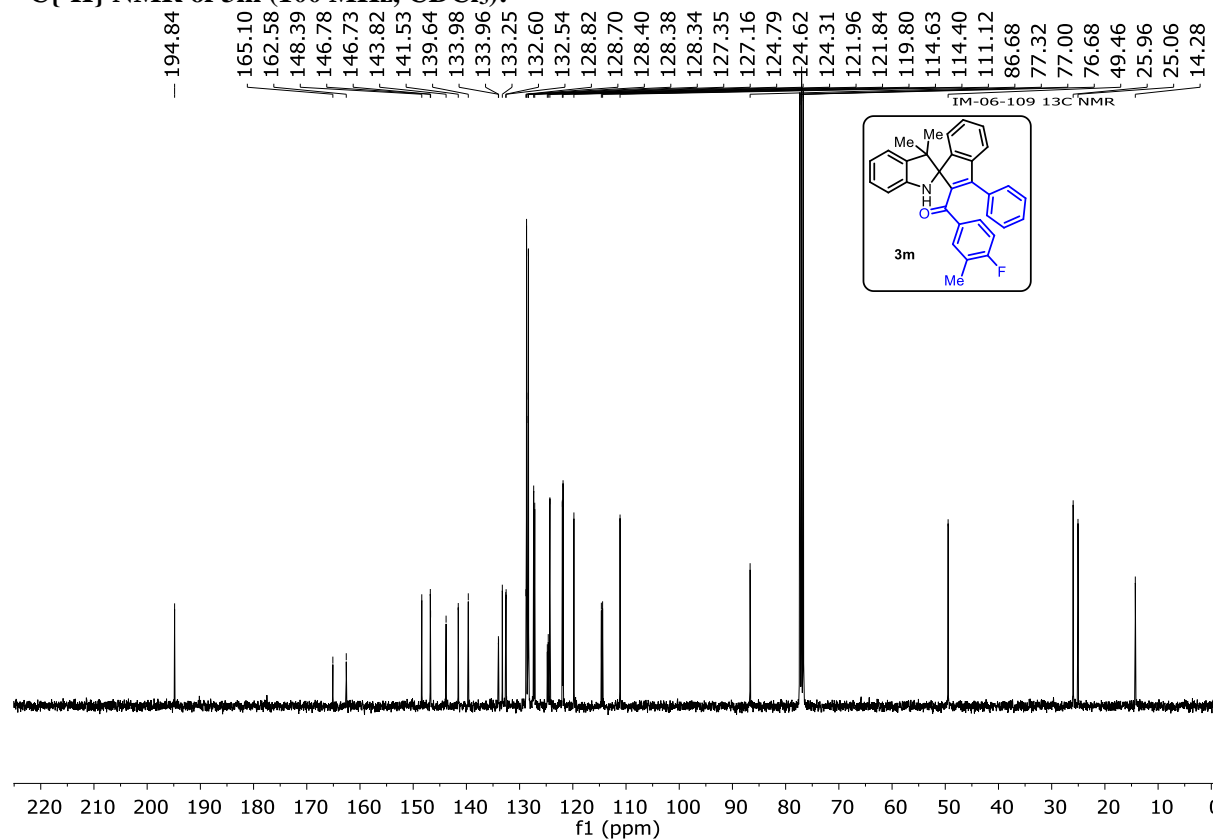

**$^{19}\text{F}$  NMR of 3m (376 MHz,  $\text{CDCl}_3$ ):**

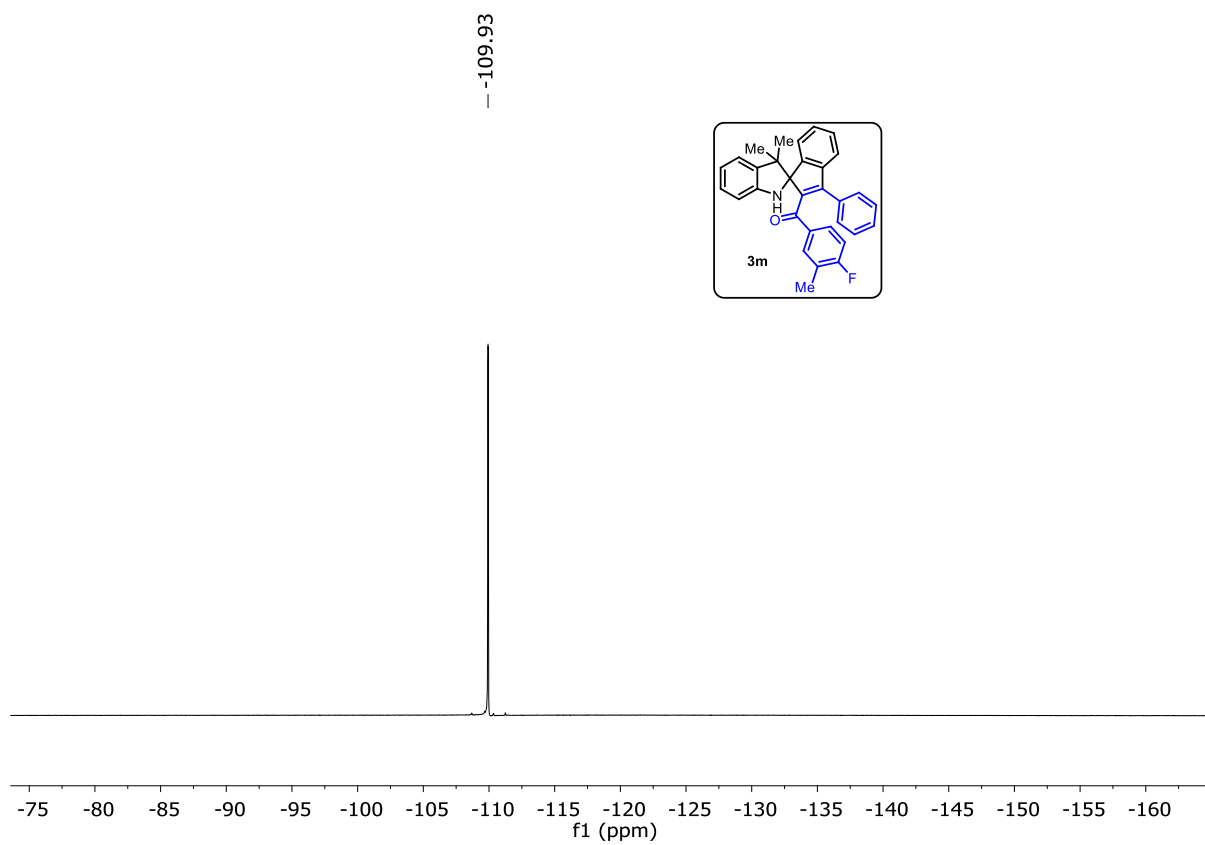

**$^1\text{H}$  NMR of 3n (400 MHz,  $\text{CDCl}_3$ ):**

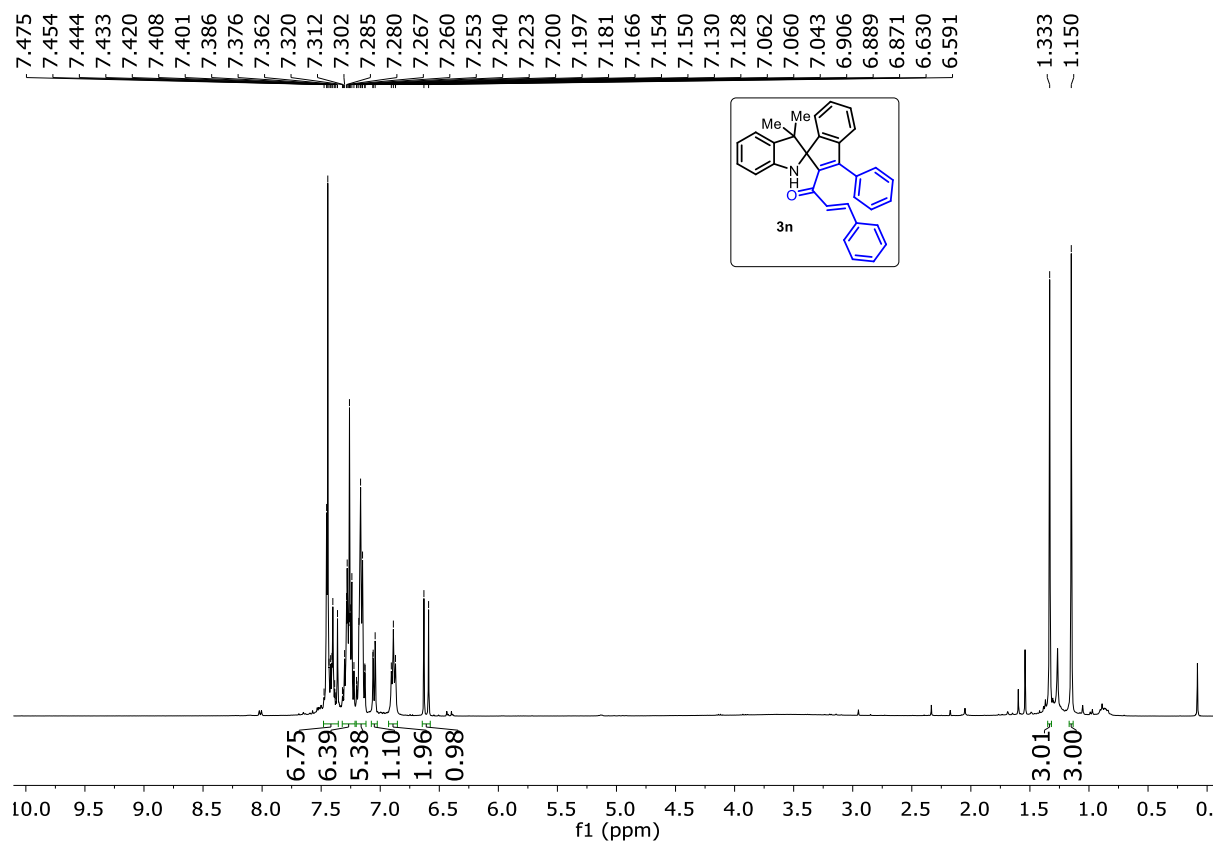

**$^{13}\text{C}\{^1\text{H}\}$  NMR of 3n (101 MHz,  $\text{CDCl}_3$ ):**

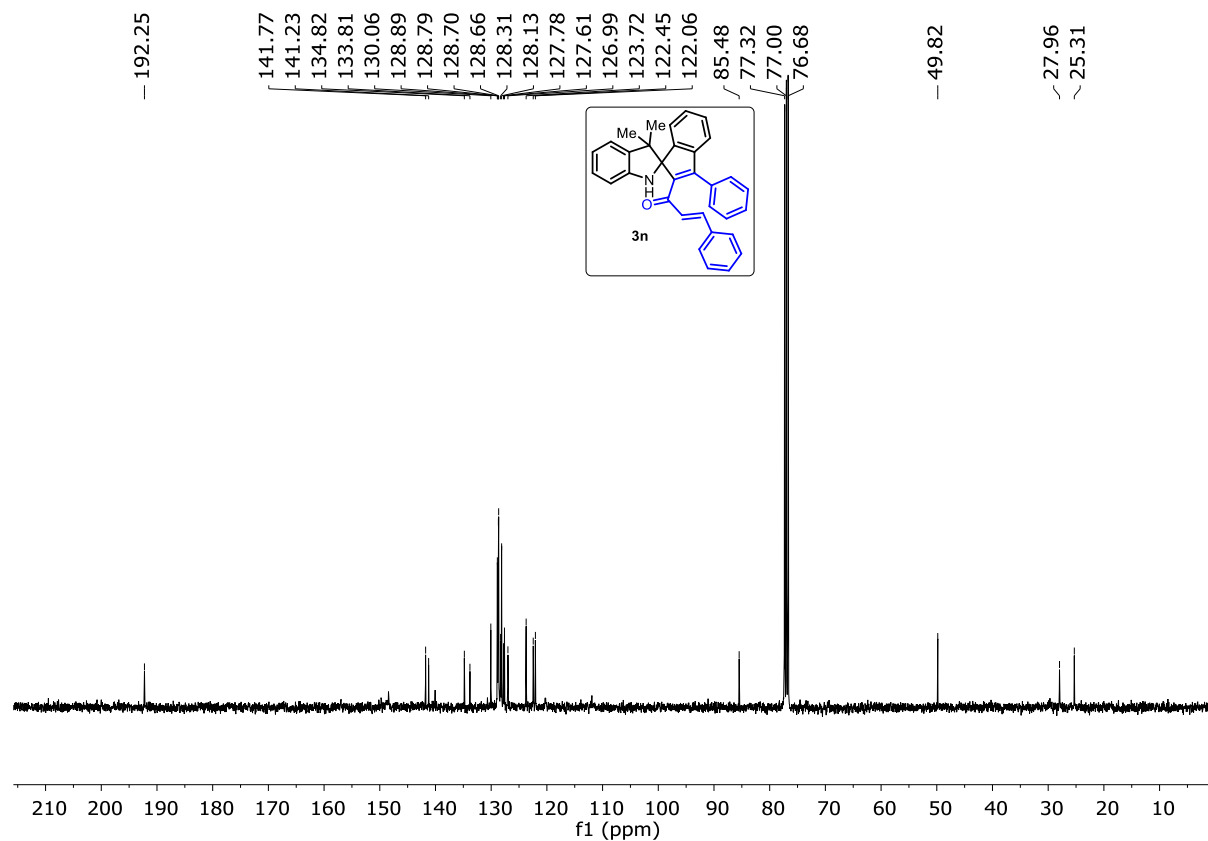

**<sup>1</sup>H NMR of 3o (400 MHz, CDCl<sub>3</sub>):**

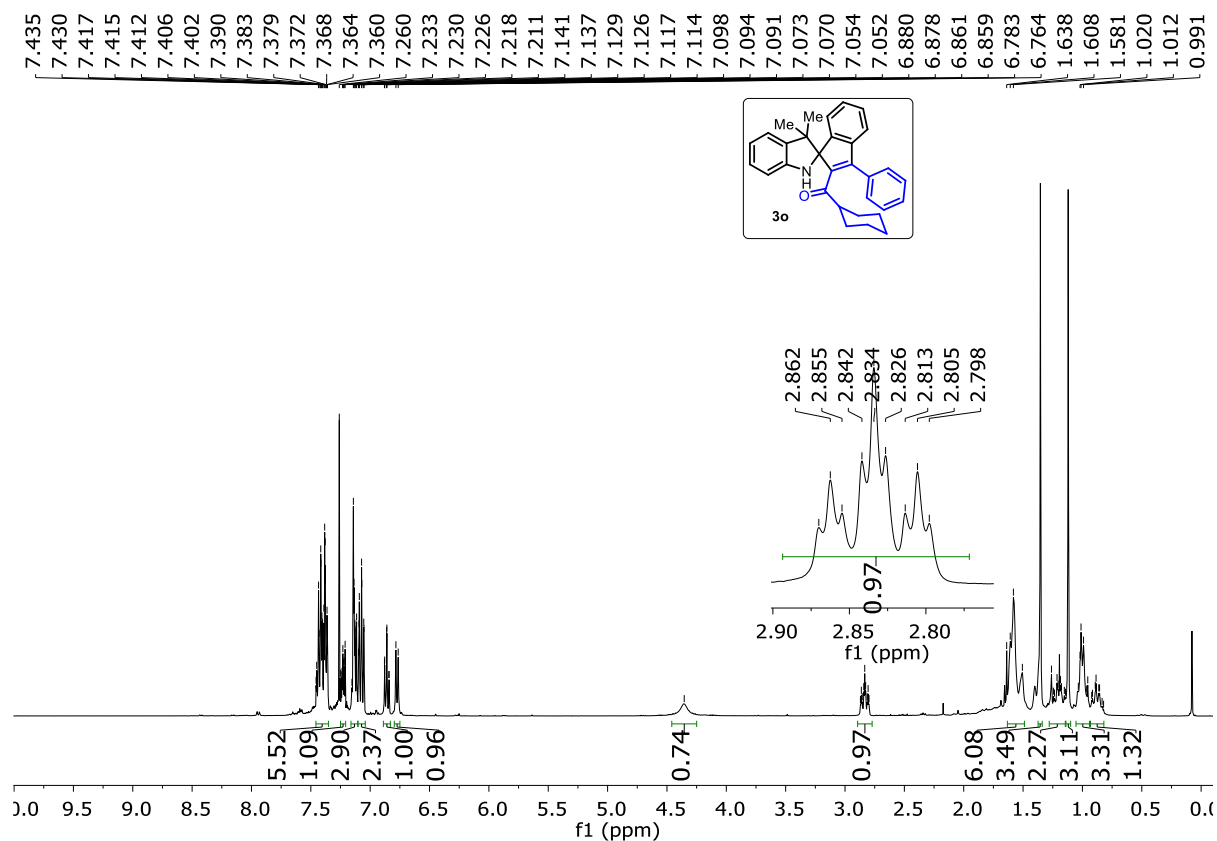

**<sup>13</sup>C{<sup>1</sup>H} NMR of 3o (101 MHz, CDCl<sub>3</sub>):**

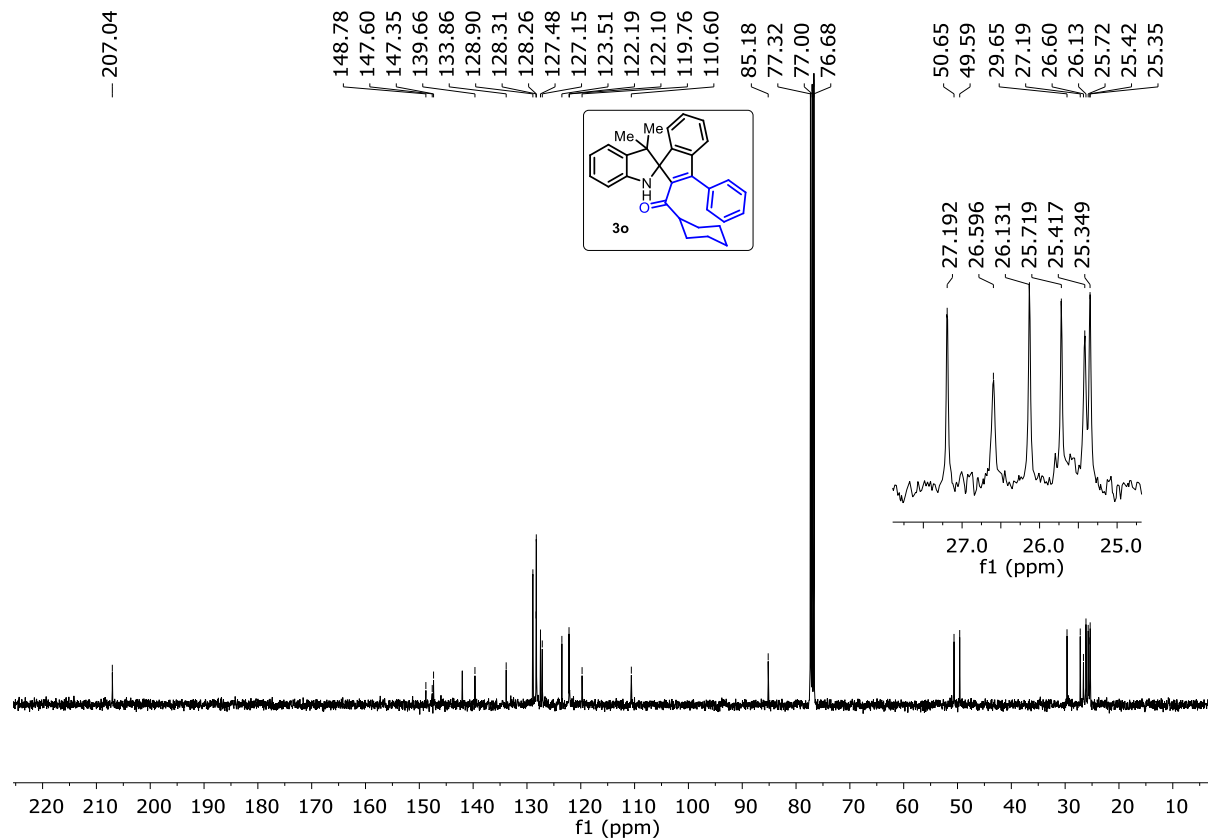

**$^1\text{H}$  NMR of 3p (400 MHz,  $\text{CDCl}_3$ ):**

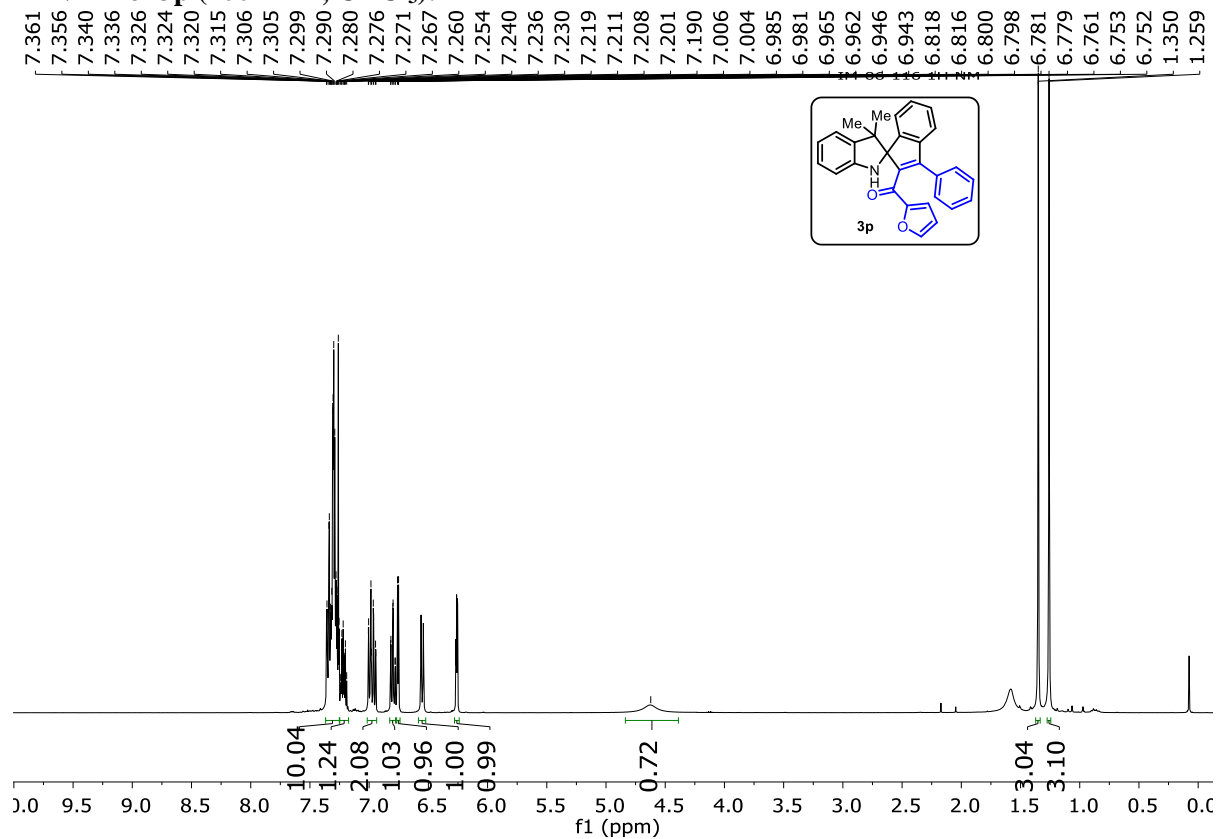

**$^{13}\text{C}\{^1\text{H}\}$  NMR of 3p (101 MHz,  $\text{CDCl}_3$ ):**

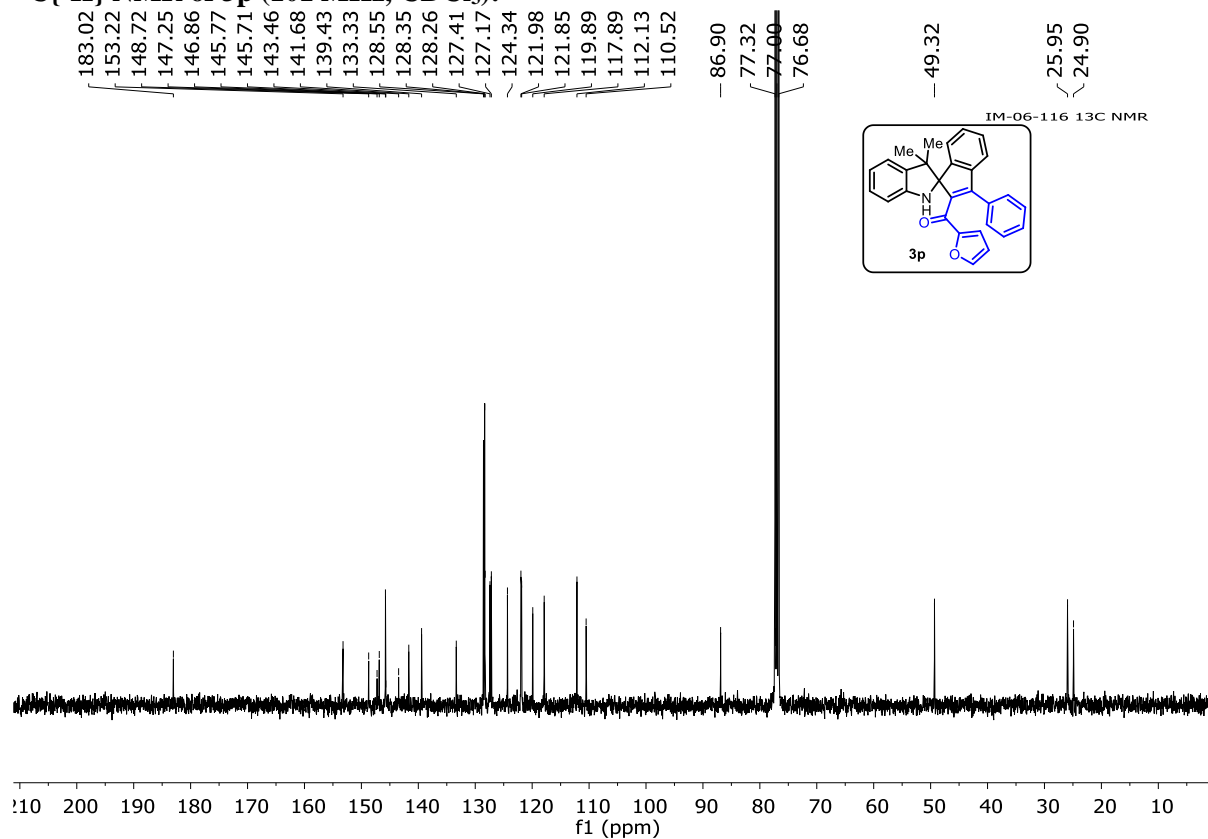

**<sup>1</sup>H NMR of 3q and 3q' (400 MHz, CDCl<sub>3</sub>):**

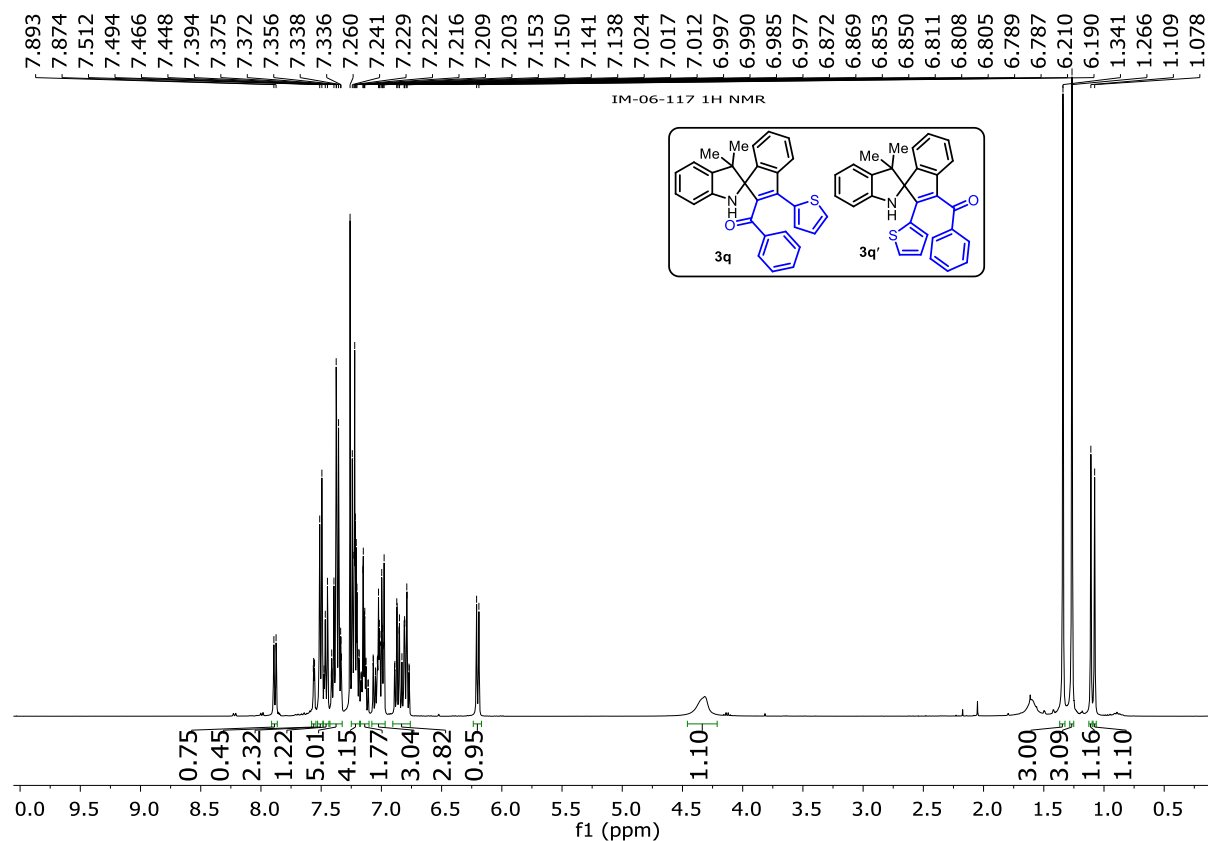

**<sup>13</sup>C{<sup>1</sup>H} NMR of 3q and 3q' (101 MHz, CDCl<sub>3</sub>):**

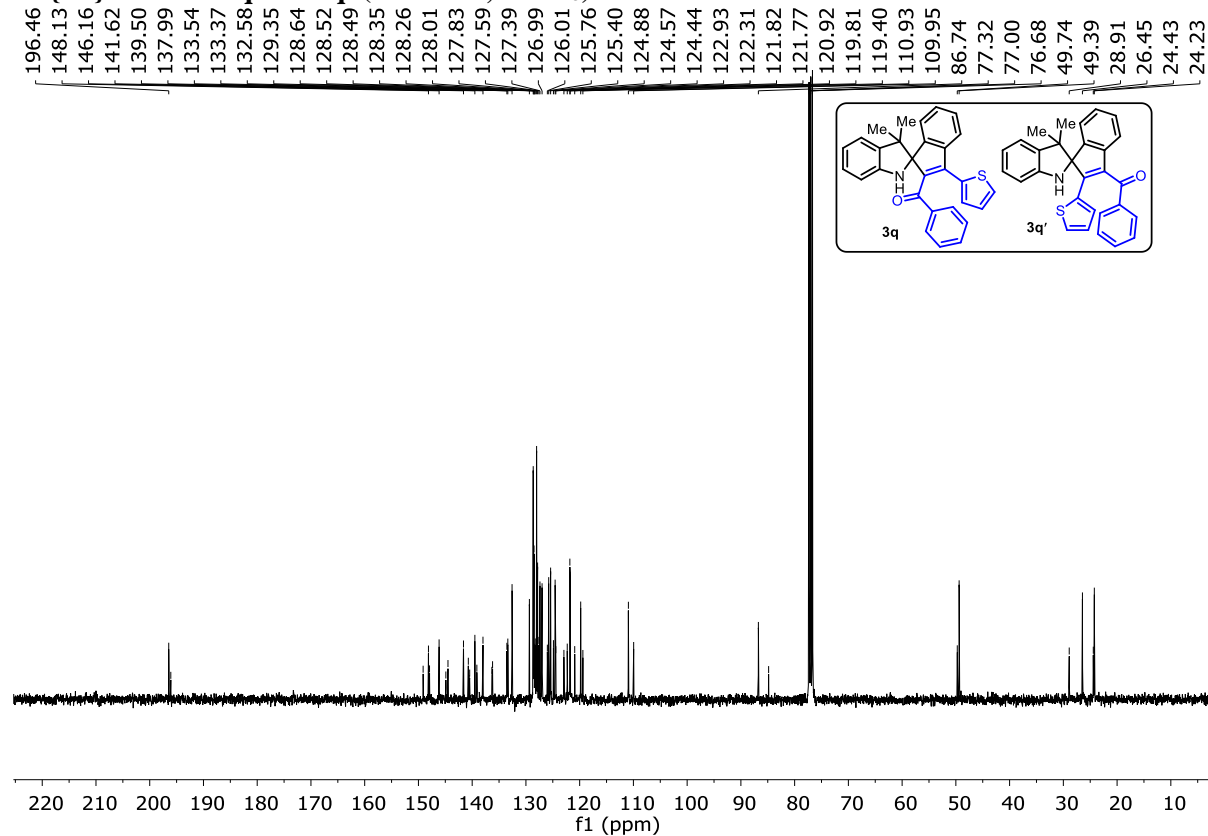

**$^1\text{H}$  NMR of 3r (400 MHz,  $\text{CDCl}_3$ ):**

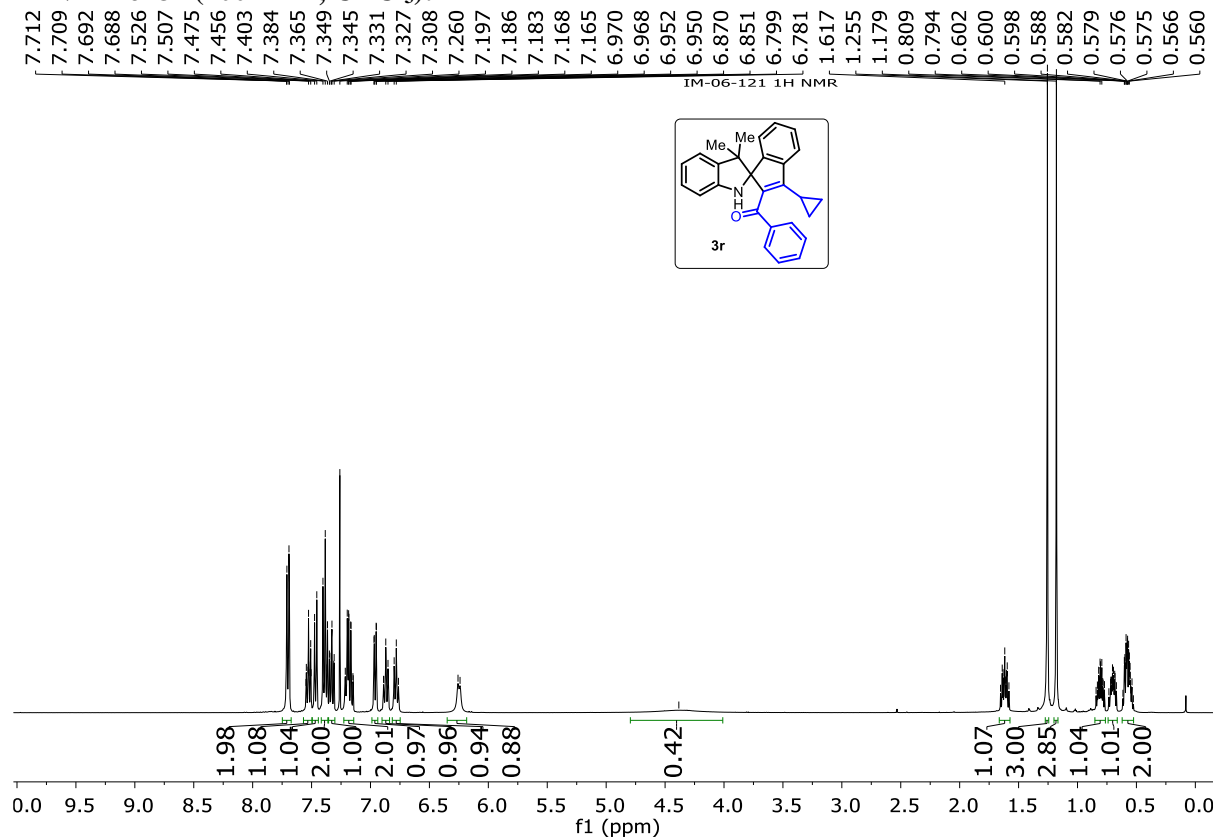

**$^{13}\text{C}\{^1\text{H}\}$  NMR of 3r (101 MHz,  $\text{CDCl}_3$ ):**

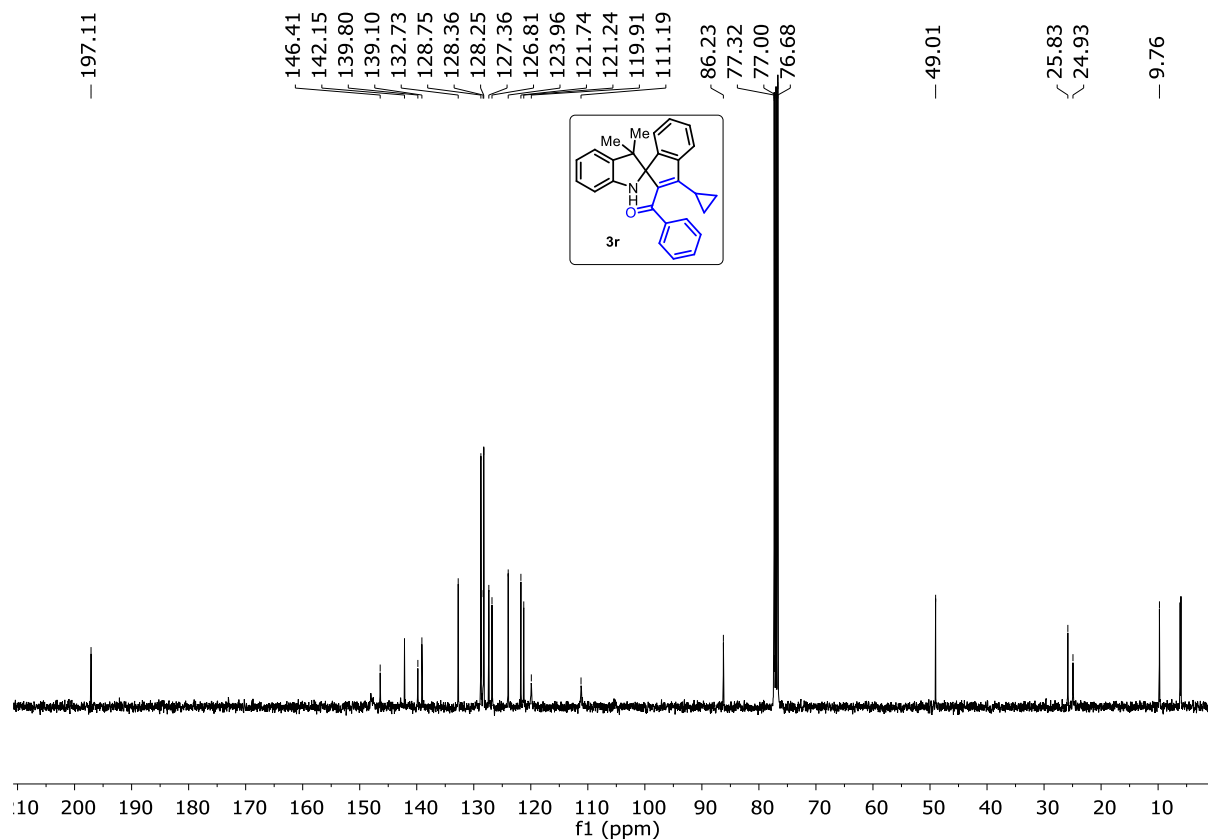

**$^1\text{H}$  NMR of 4a (400 MHz,  $\text{CDCl}_3$ ):**

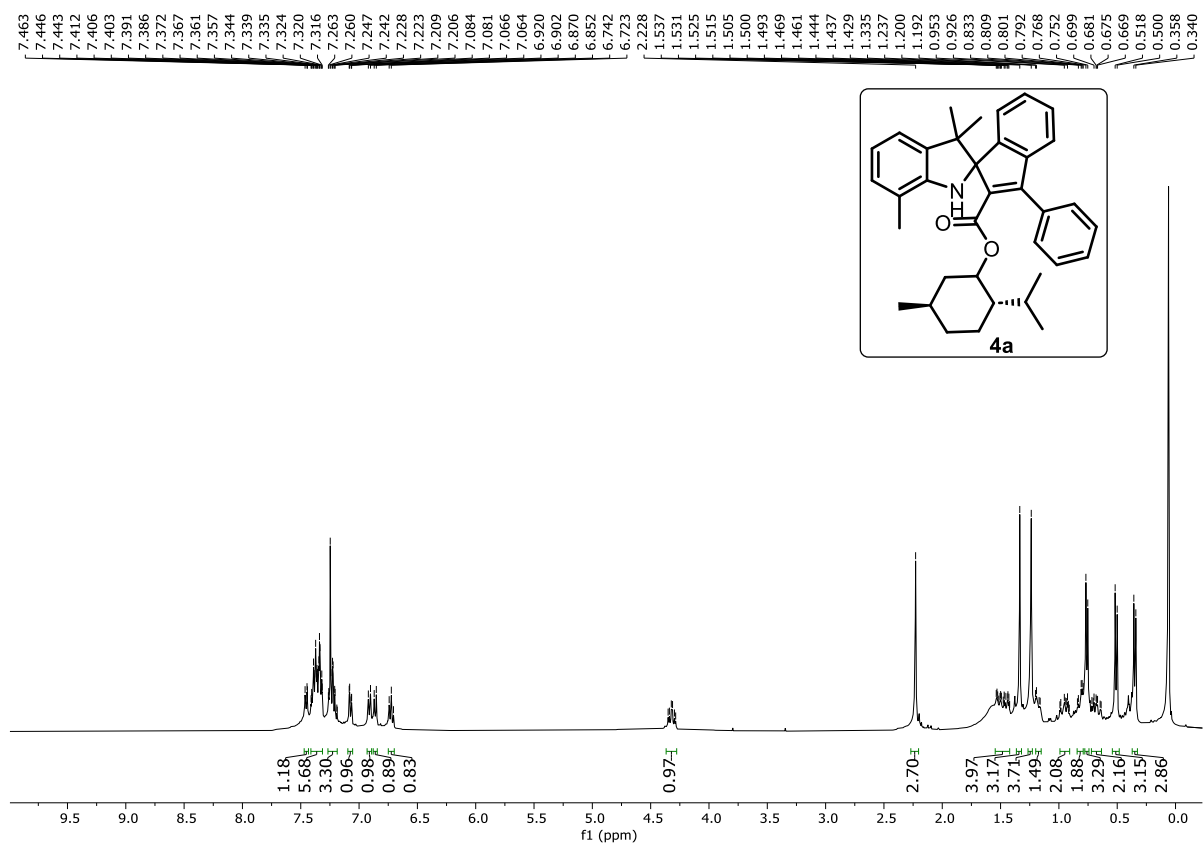

**$^{13}\text{C}\{^1\text{H}\}$  NMR of 4a (101 MHz,  $\text{CDCl}_3$ ):**

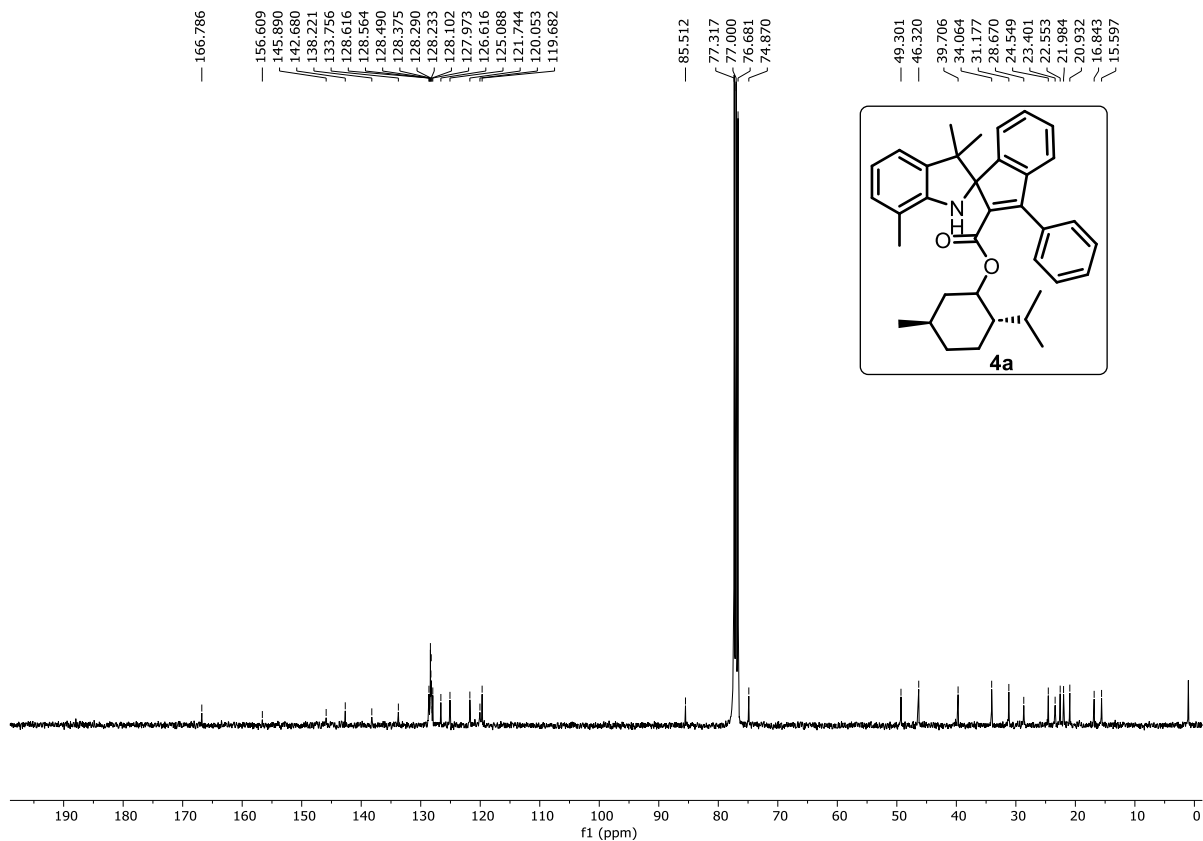

**<sup>1</sup>H NMR of 4b (400 MHz, CDCl<sub>3</sub>):**

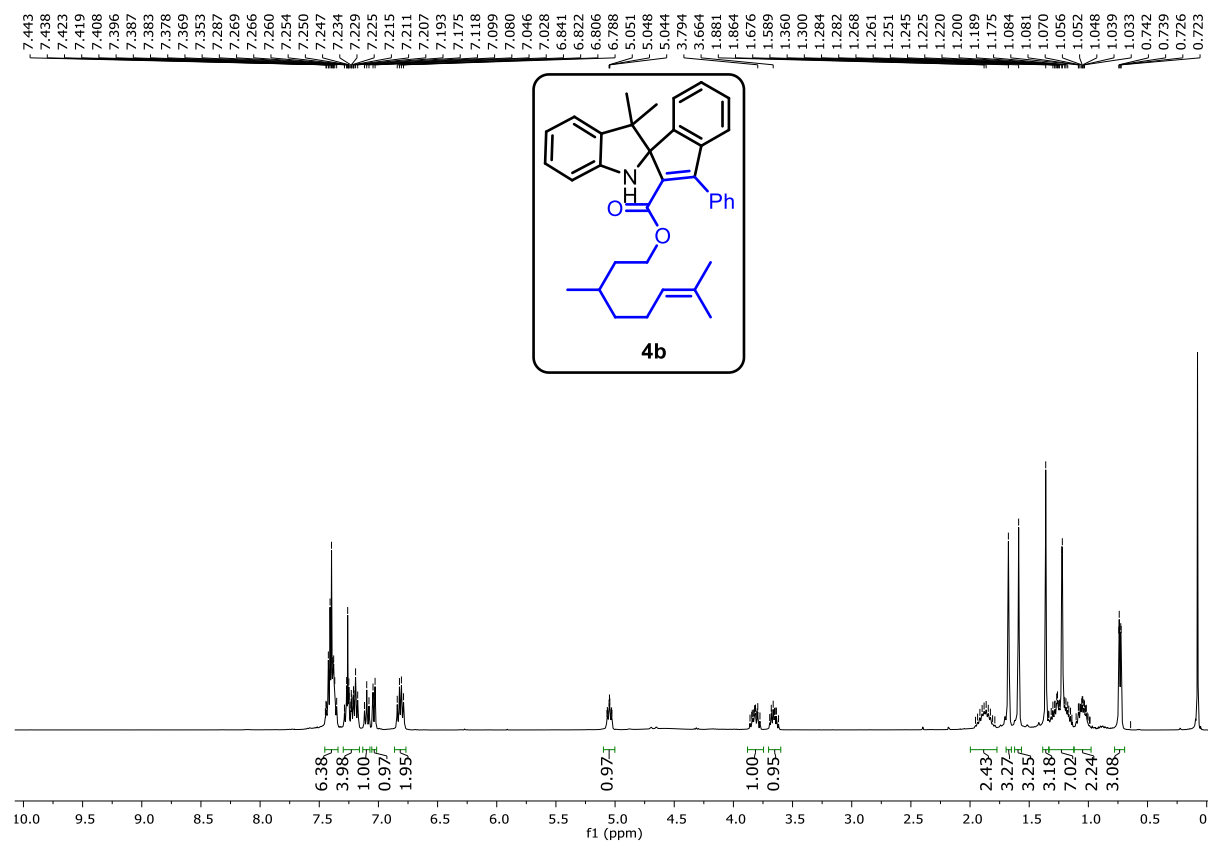

**<sup>13</sup>C{<sup>1</sup>H} NMR of 4b (101 MHz, CDCl<sub>3</sub>):**

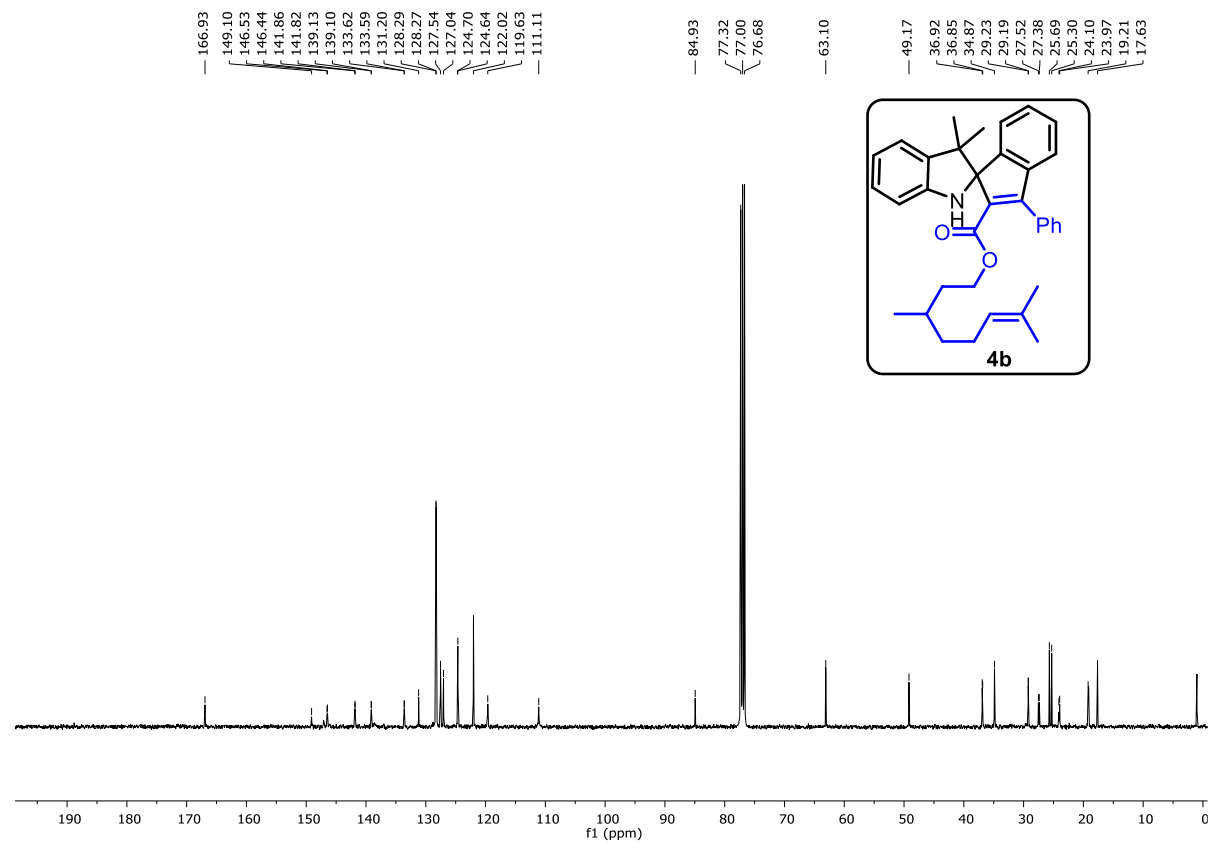

### $^1\text{H}$ NMR of **4c** (400 MHz, $\text{CDCl}_3$ ):

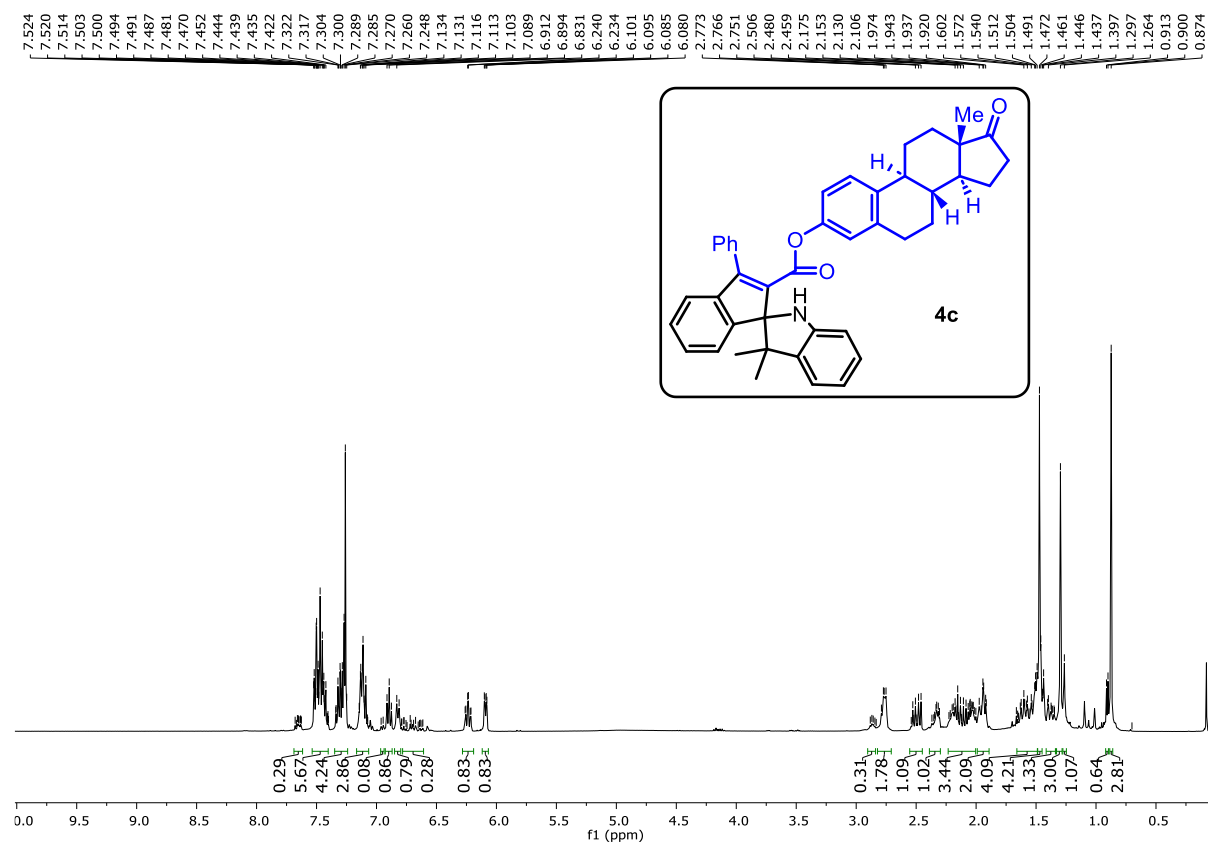

### $^{13}\text{C}\{^1\text{H}\}$ NMR of **4c** (101 MHz, $\text{CDCl}_3$ ):

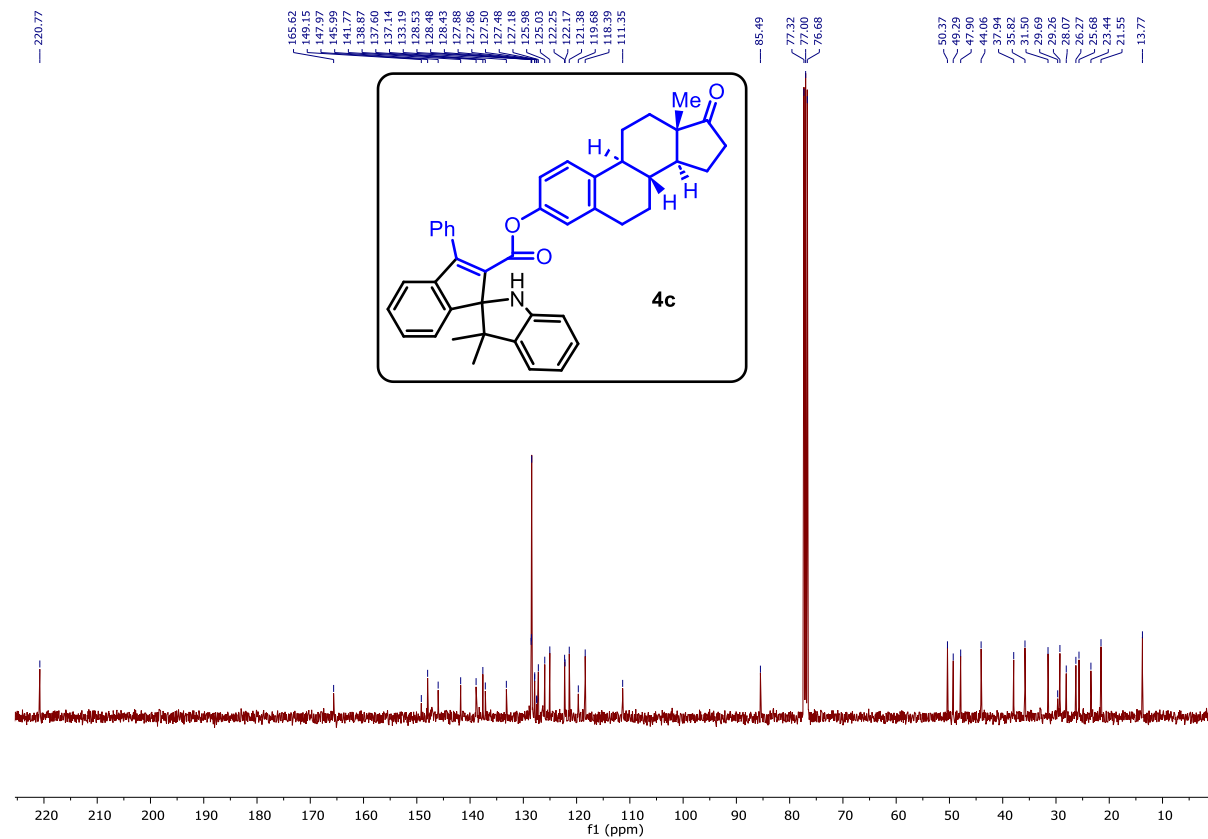

**$^1\text{H}$  NMR of 4d (400 MHz,  $\text{CDCl}_3$ ):**

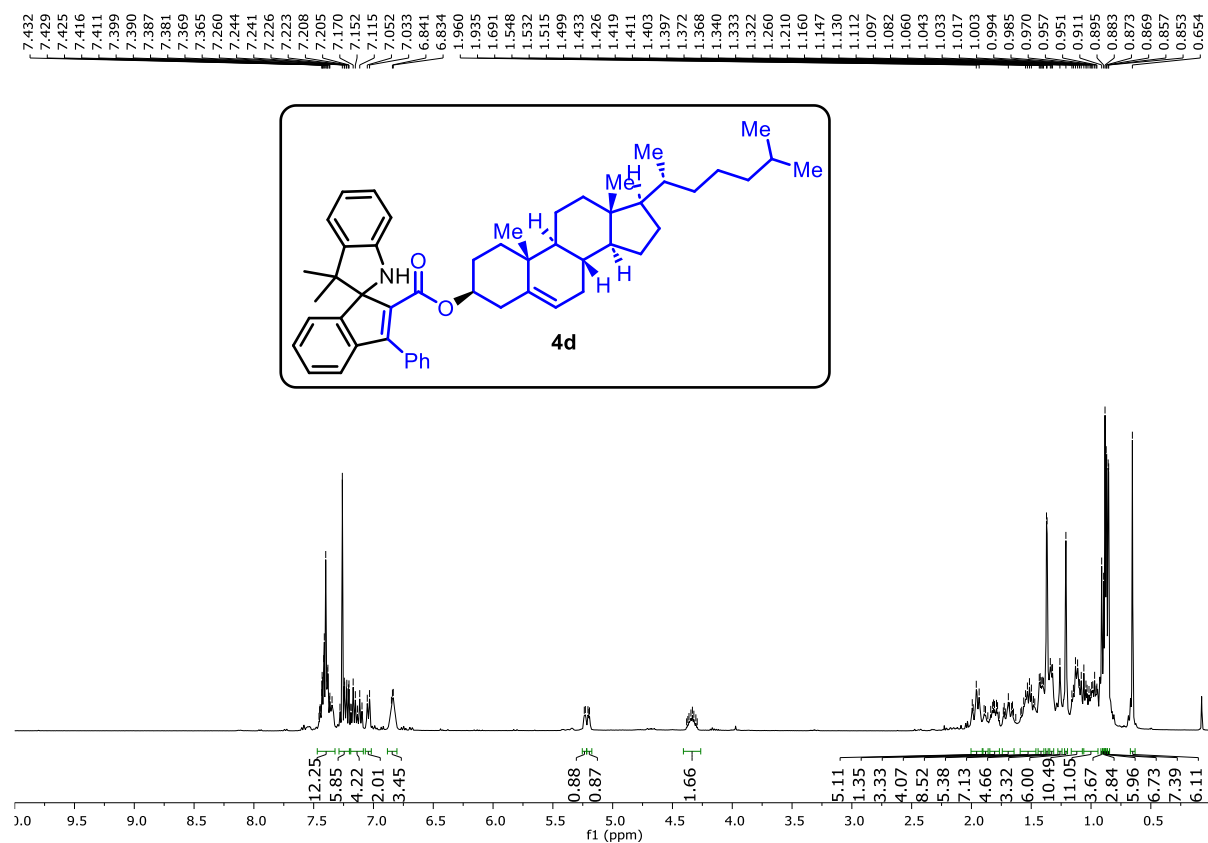

**$^{13}\text{C}\{^1\text{H}\}$  NMR of 4d (101 MHz,  $\text{CDCl}_3$ ):**

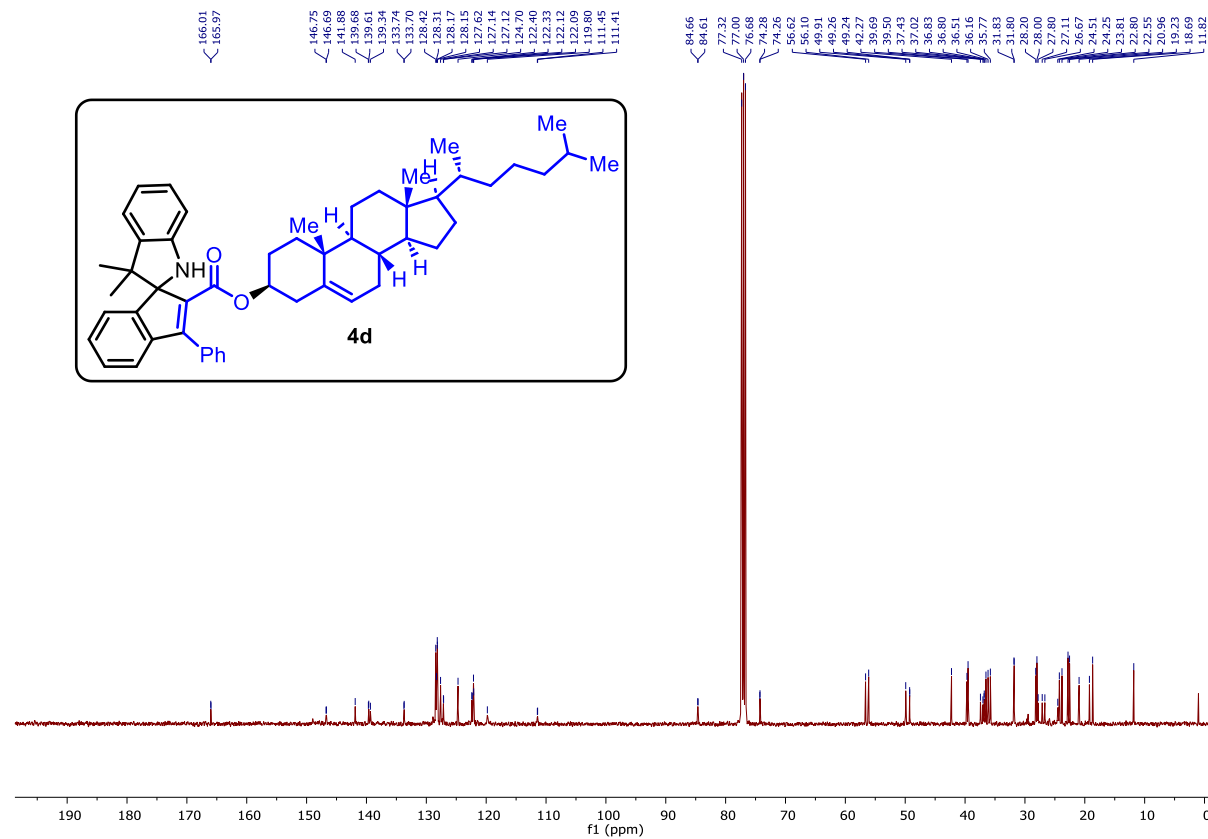

**$^1\text{H}$  NMR of 4e (400 MHz,  $\text{CDCl}_3$ ):**

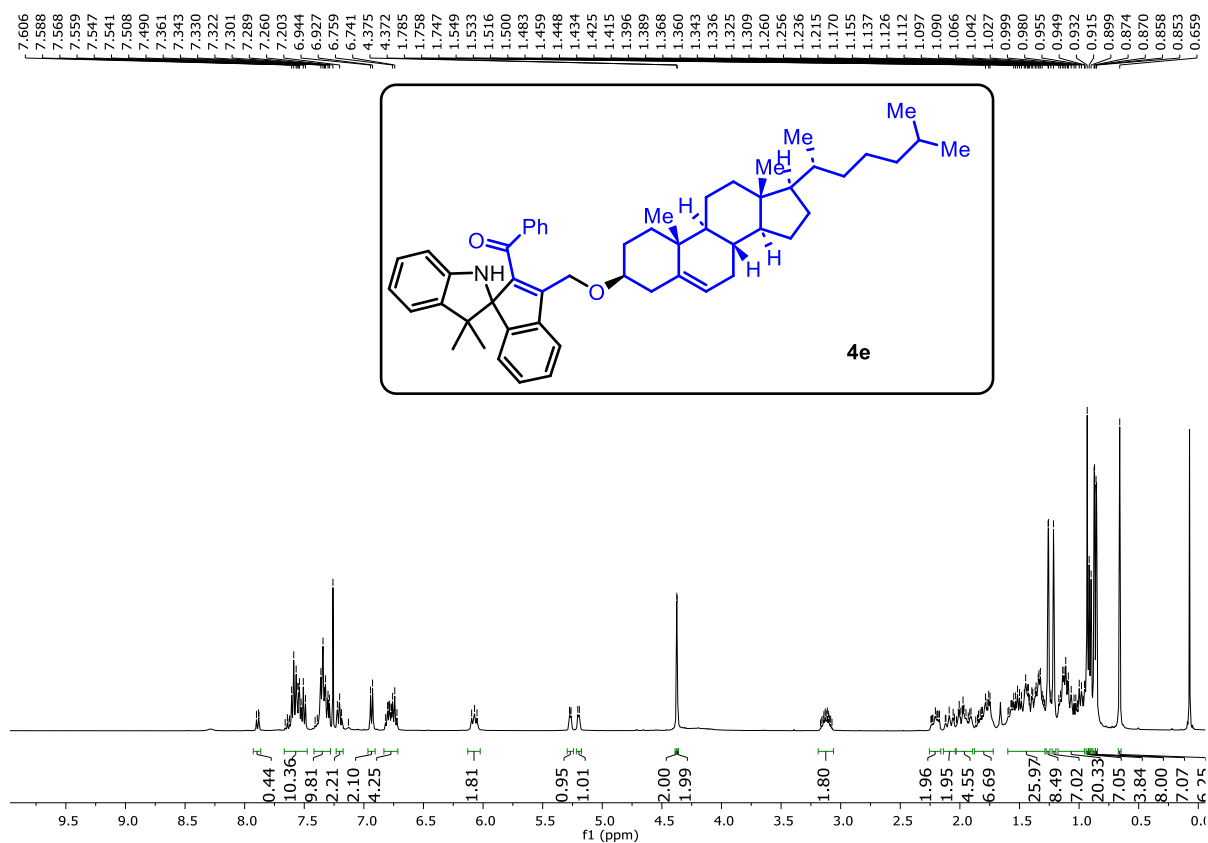

**$^{13}\text{C}\{^1\text{H}\}$  NMR of 4e (101 MHz,  $\text{CDCl}_3$ ):**

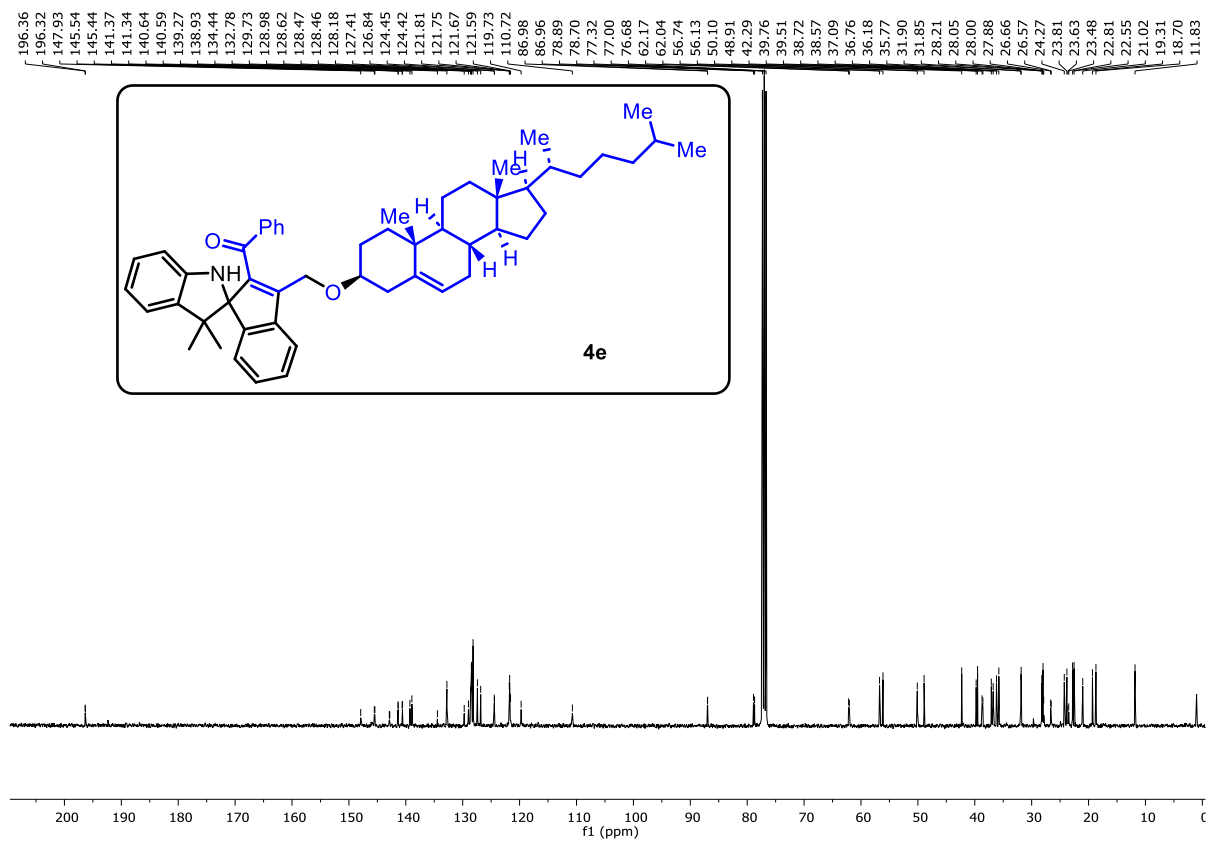

**$^1\text{H}$  NMR of 5a (400 MHz,  $\text{CDCl}_3$ ):**

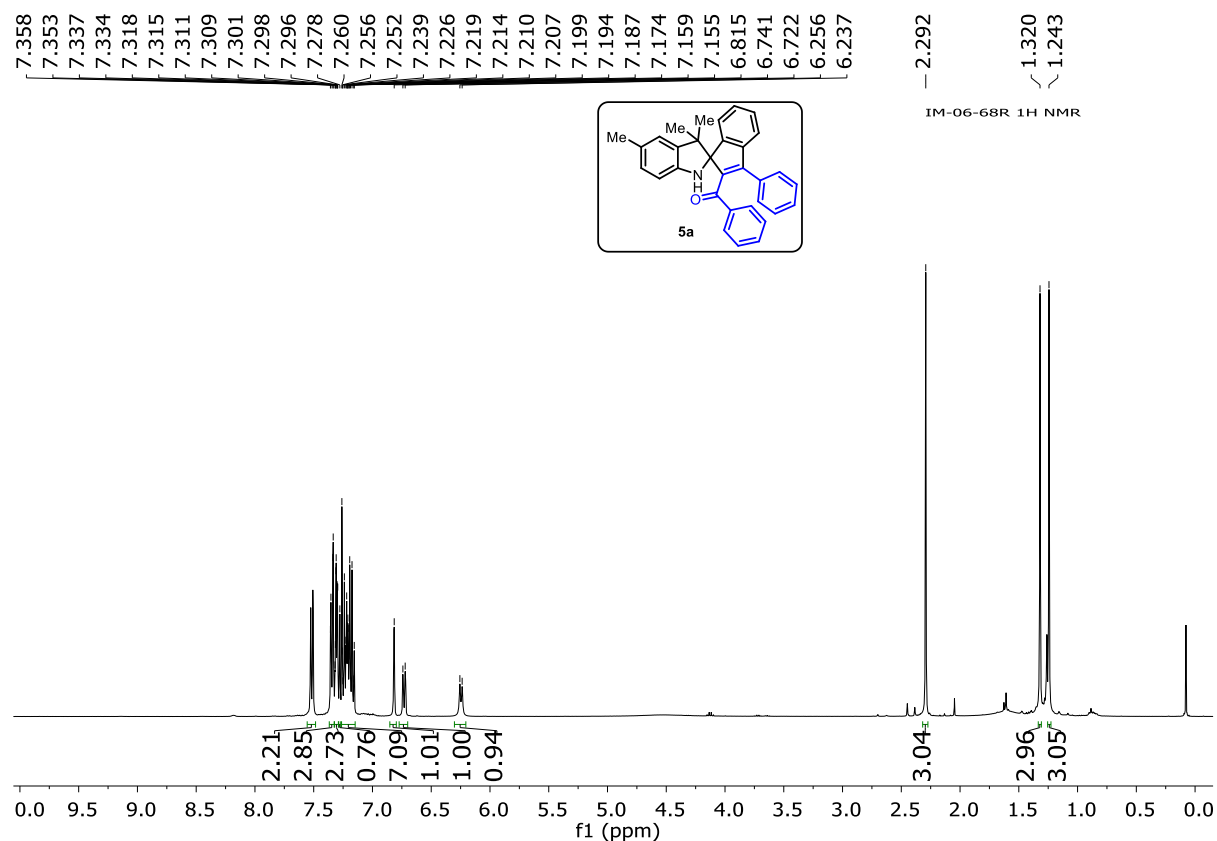

**$^{13}\text{C}\{^1\text{H}\}$  NMR of 5a (101 MHz,  $\text{CDCl}_3$ ):**

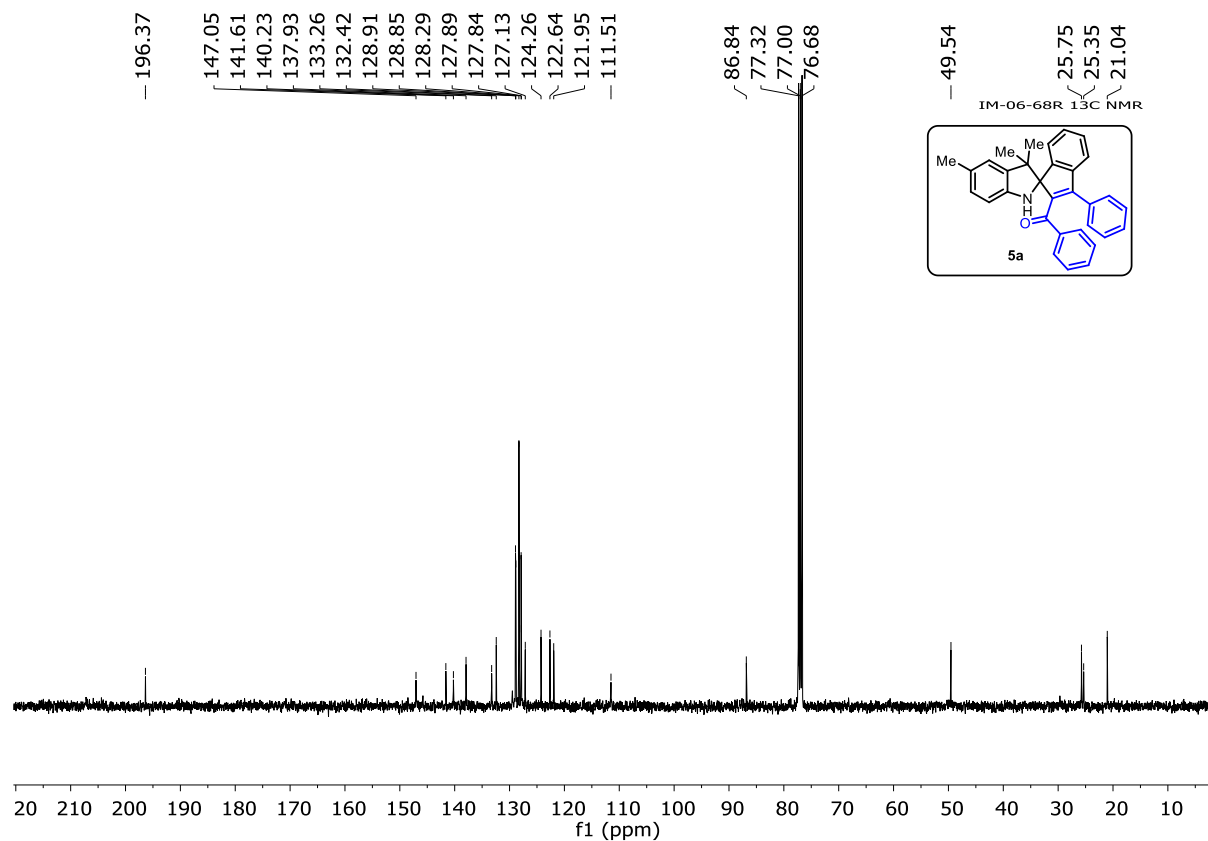

**<sup>1</sup>H NMR of 5b (400 MHz, CDCl<sub>3</sub>):**

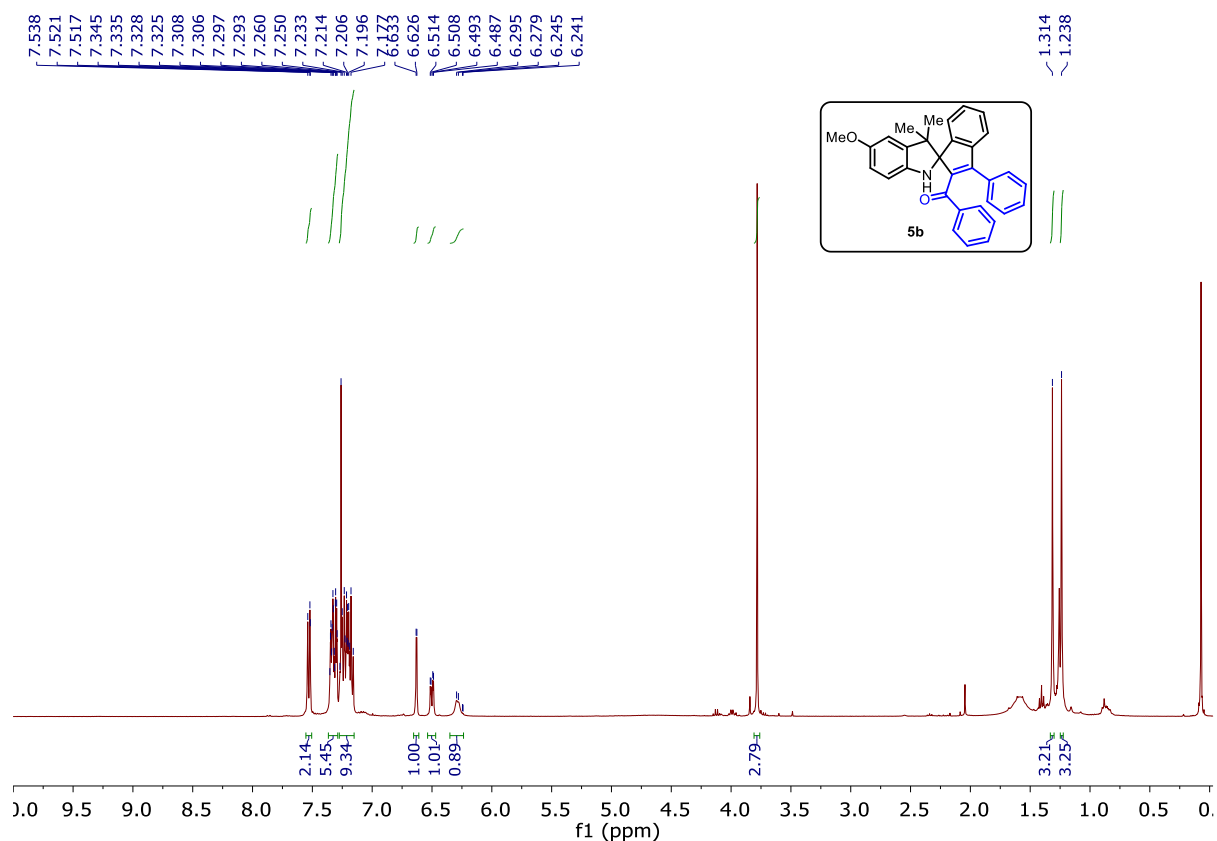

**<sup>13</sup>C{<sup>1</sup>H} NMR of 5b (101 MHz, CDCl<sub>3</sub>):**

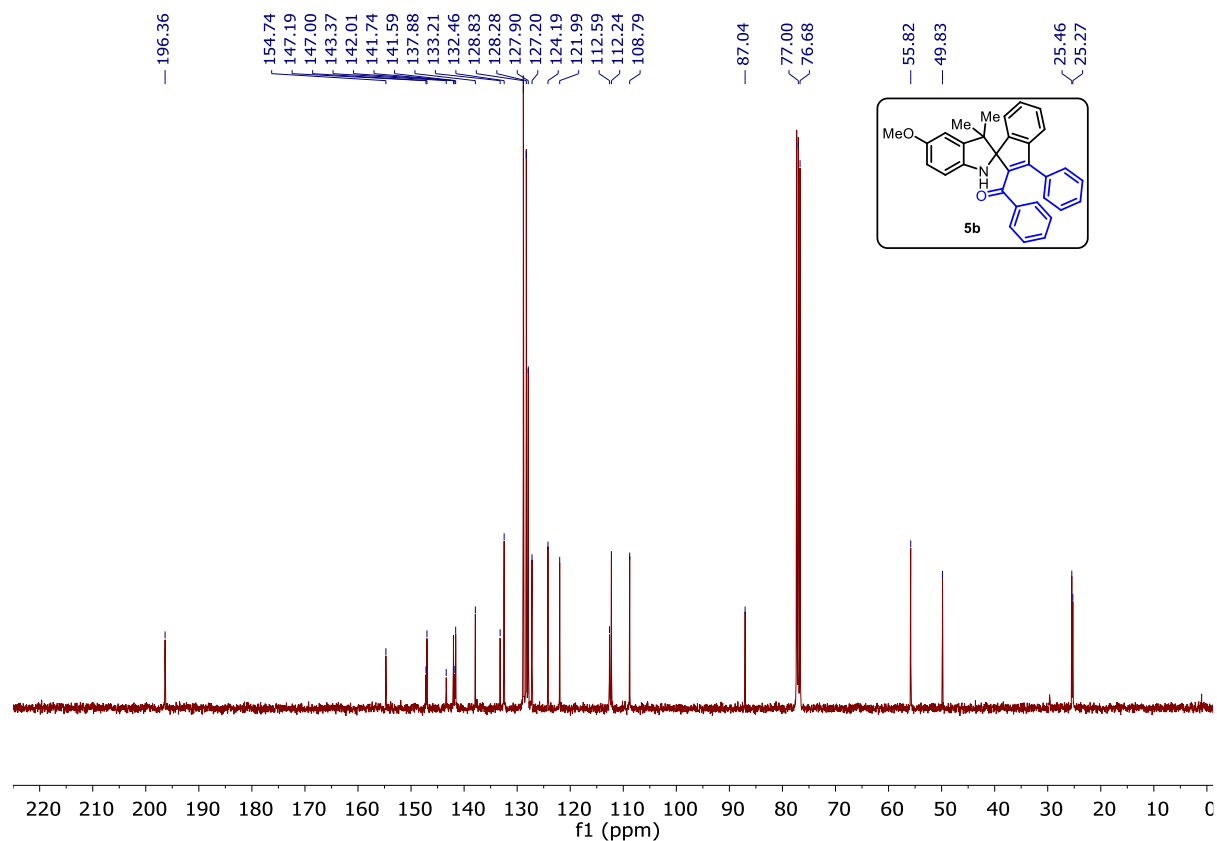

**<sup>1</sup>H NMR of 5c (400 MHz, CDCl<sub>3</sub>):**

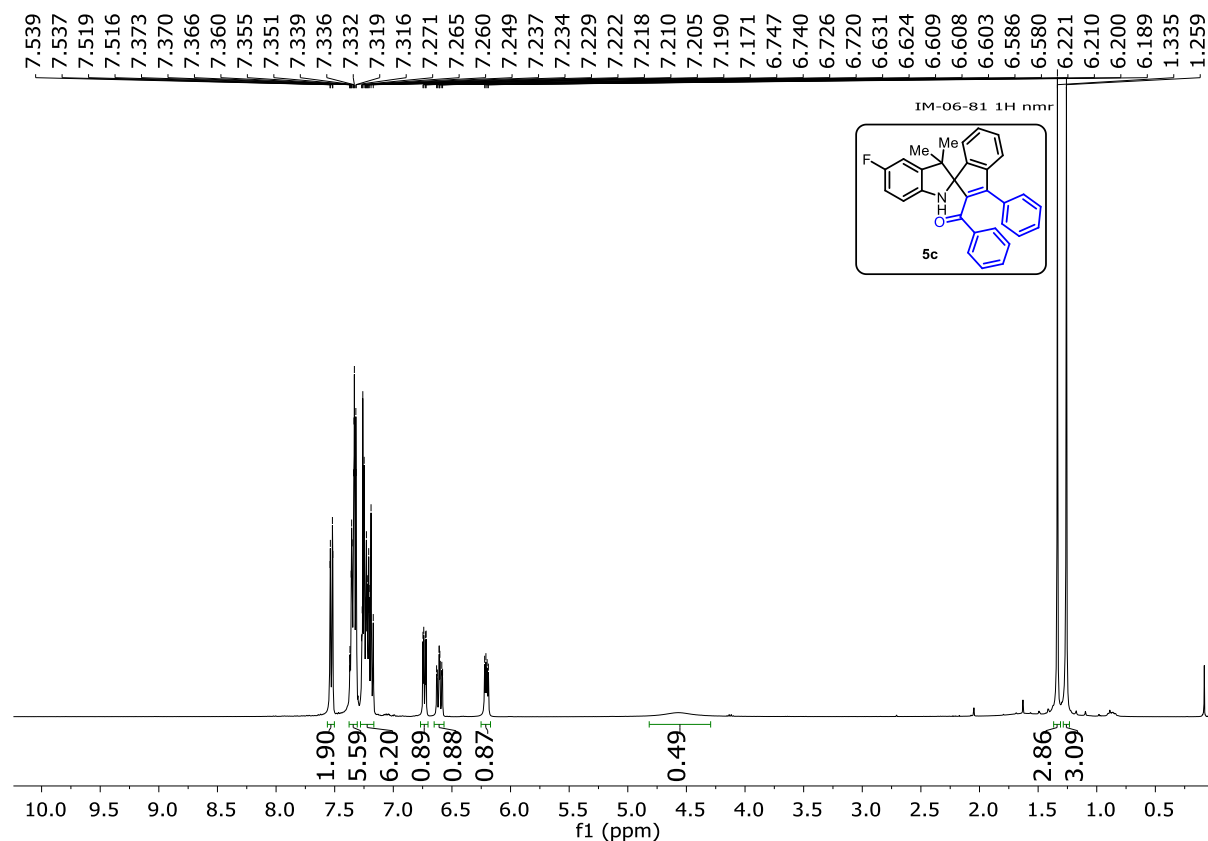

**<sup>13</sup>C{<sup>1</sup>H} NMR of 5c (101 MHz, CDCl<sub>3</sub>):**

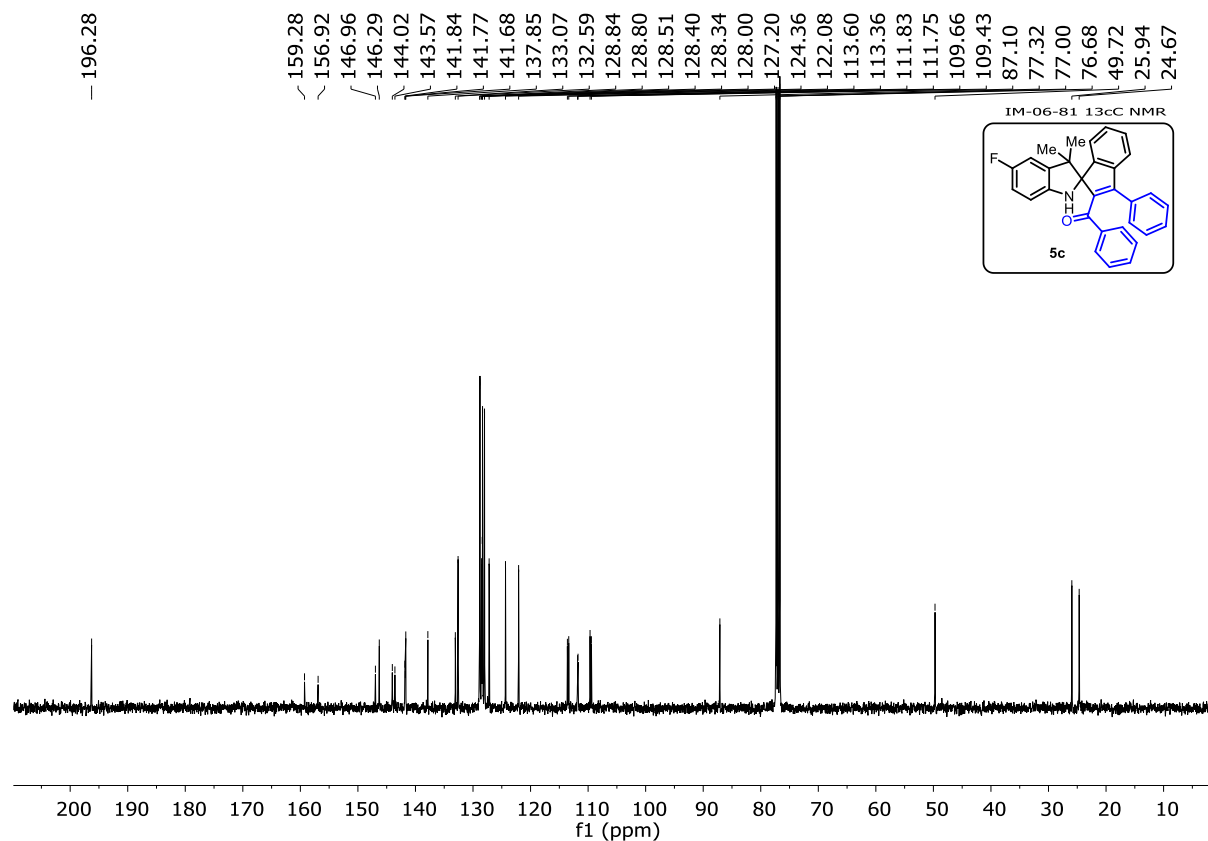

**$^{19}\text{F}$  NMR of 5c (376 MHz,  $\text{CDCl}_3$ ):**

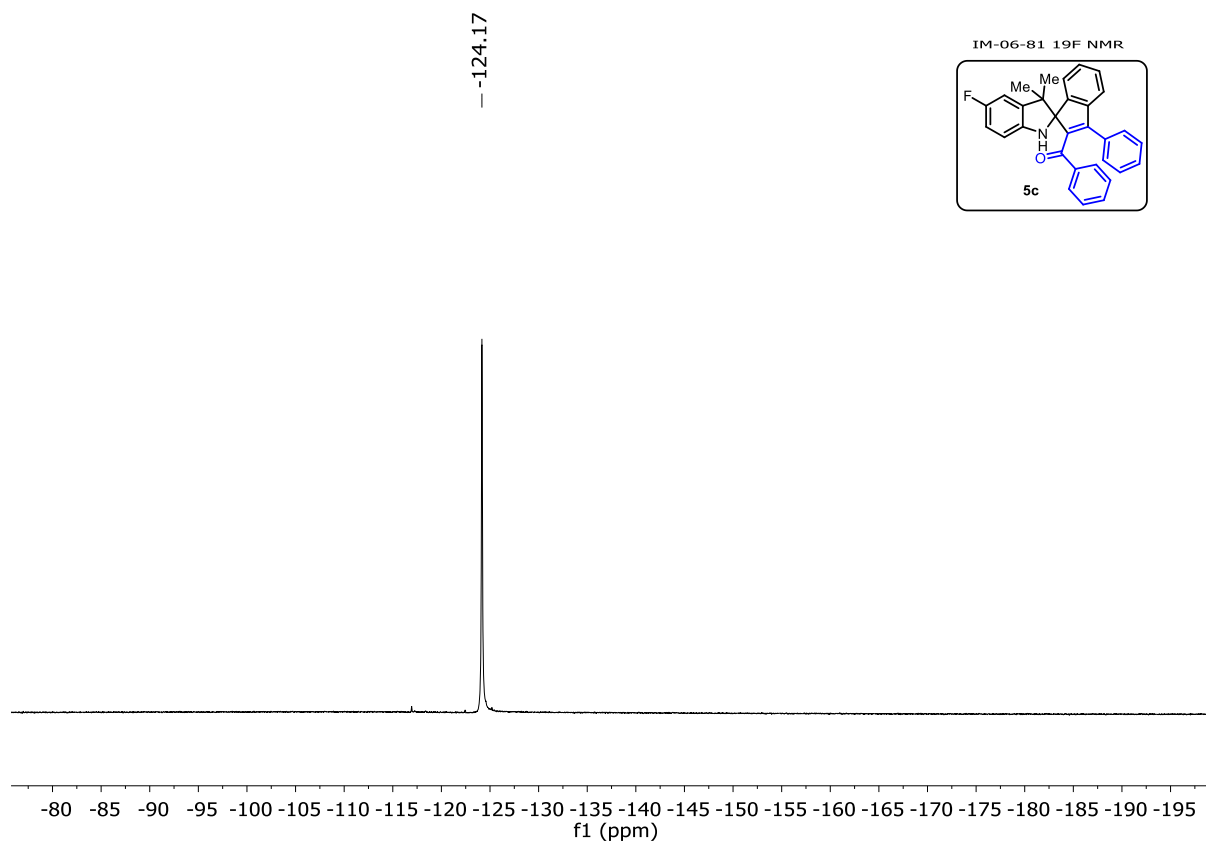

**<sup>1</sup>H NMR of 5d (400 MHz, CDCl<sub>3</sub>):**

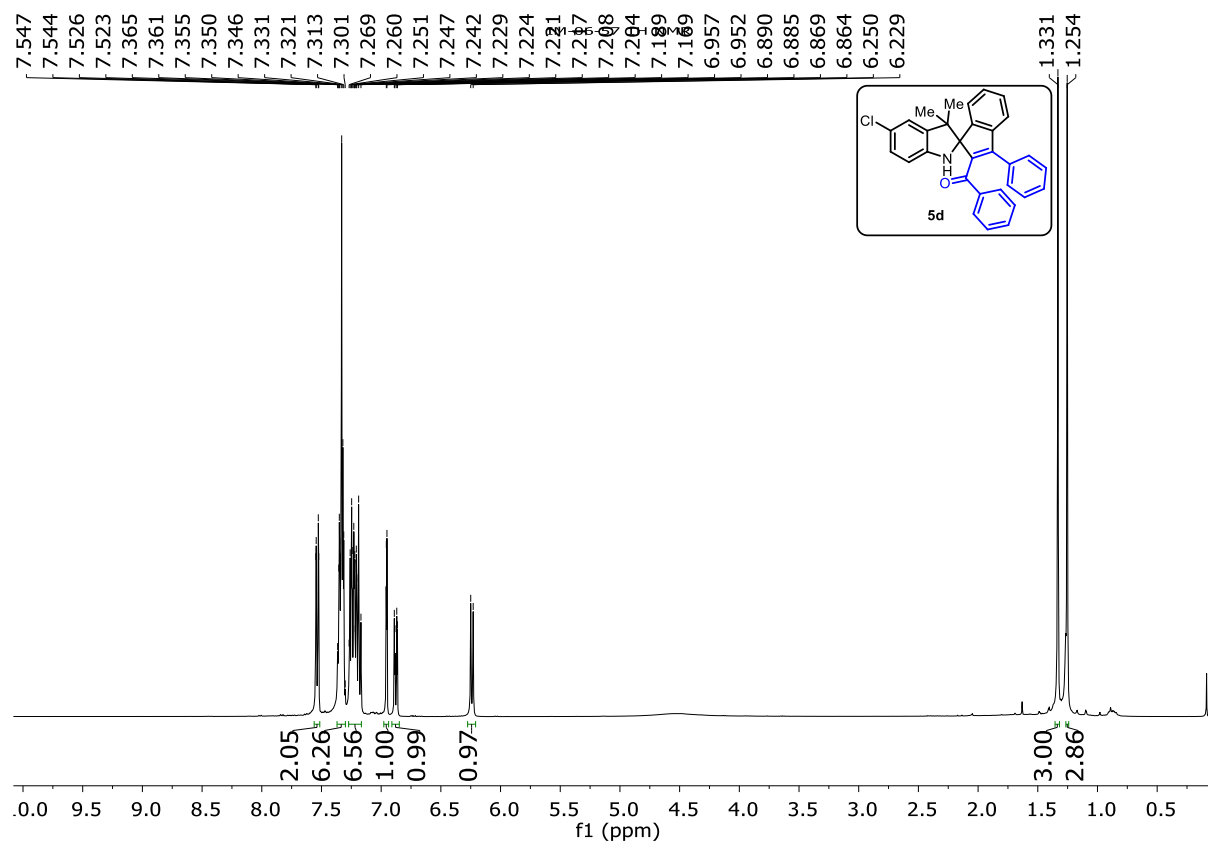

**<sup>13</sup>C{<sup>1</sup>H} NMR of 5d (101 MHz, CDCl<sub>3</sub>):**

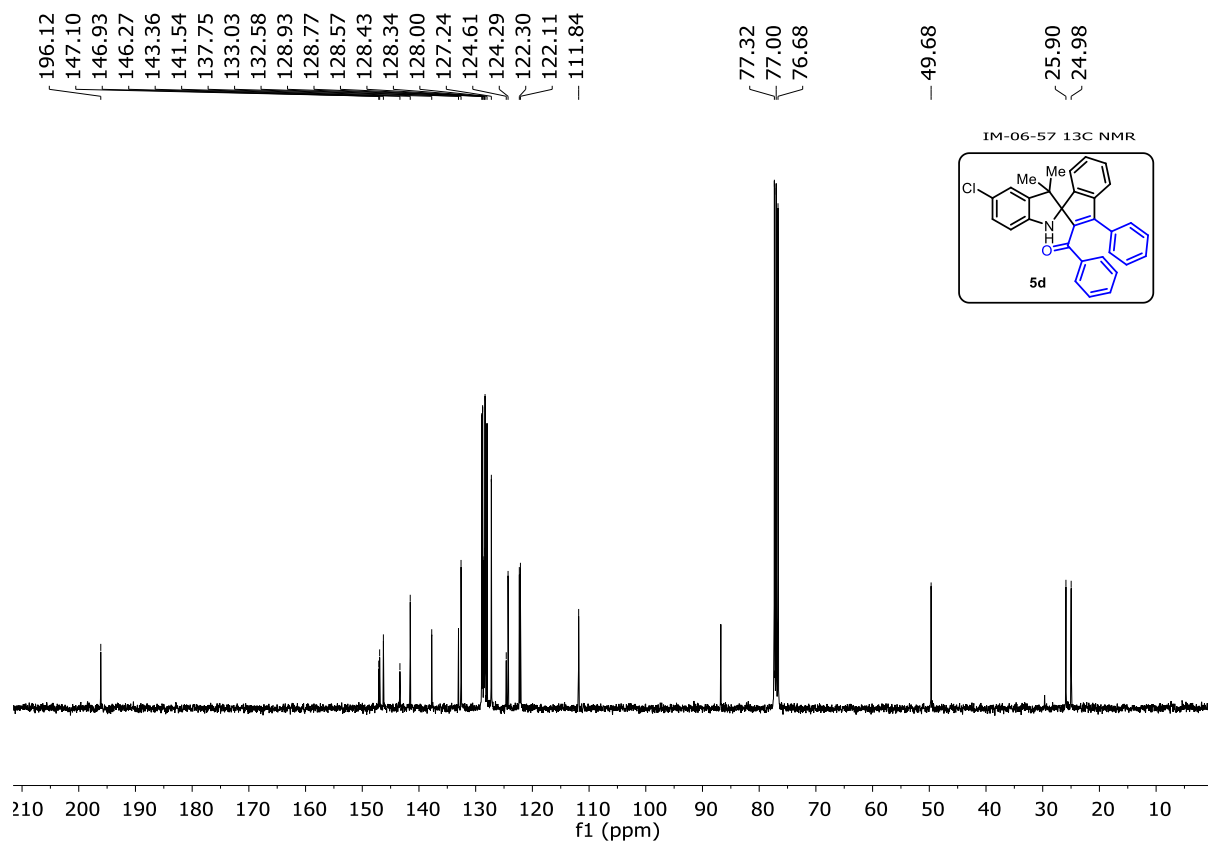

**$^1\text{H}$  NMR of 5e (400 MHz,  $\text{CDCl}_3$ ):**

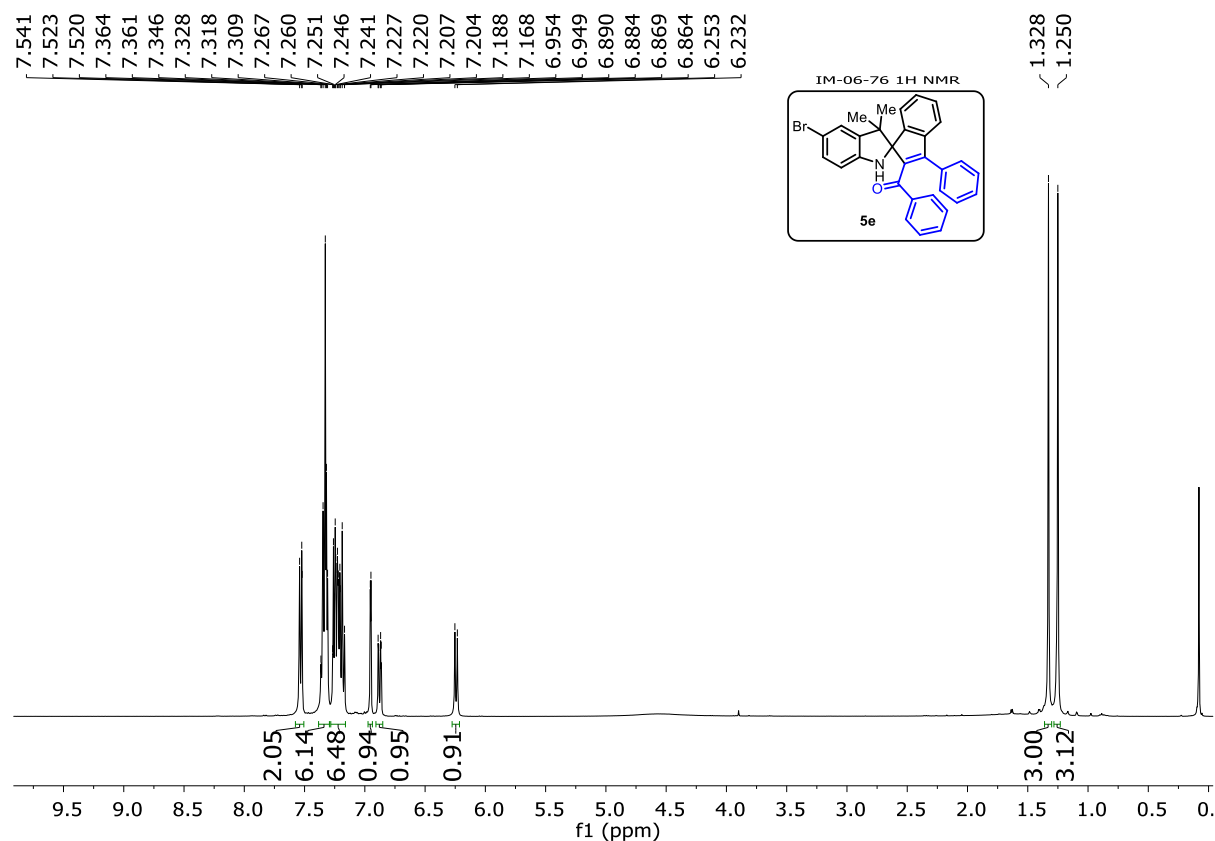

**$^{13}\text{C}\{^1\text{H}\}$  NMR of 5e (101 MHz,  $\text{CDCl}_3$ ):**

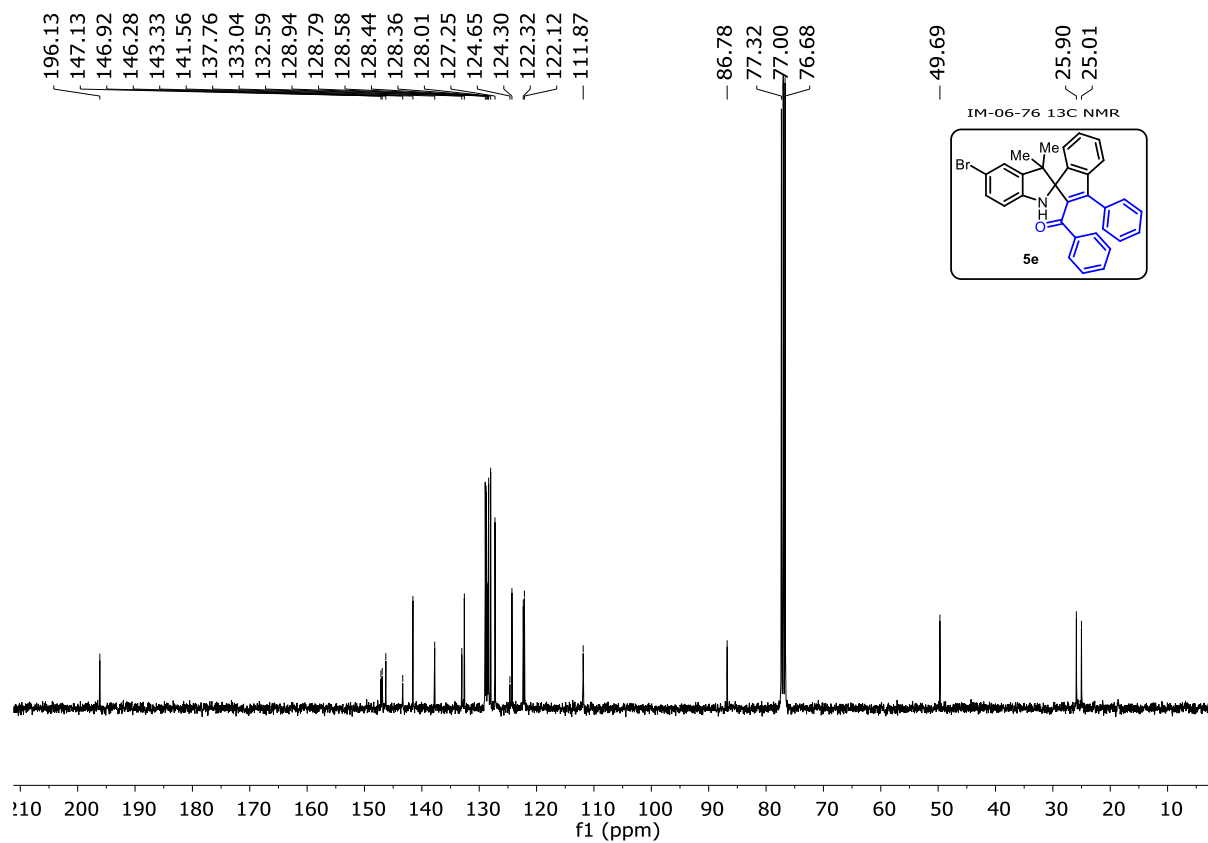

**<sup>1</sup>H NMR of 5f (400 MHz, CDCl<sub>3</sub>):**

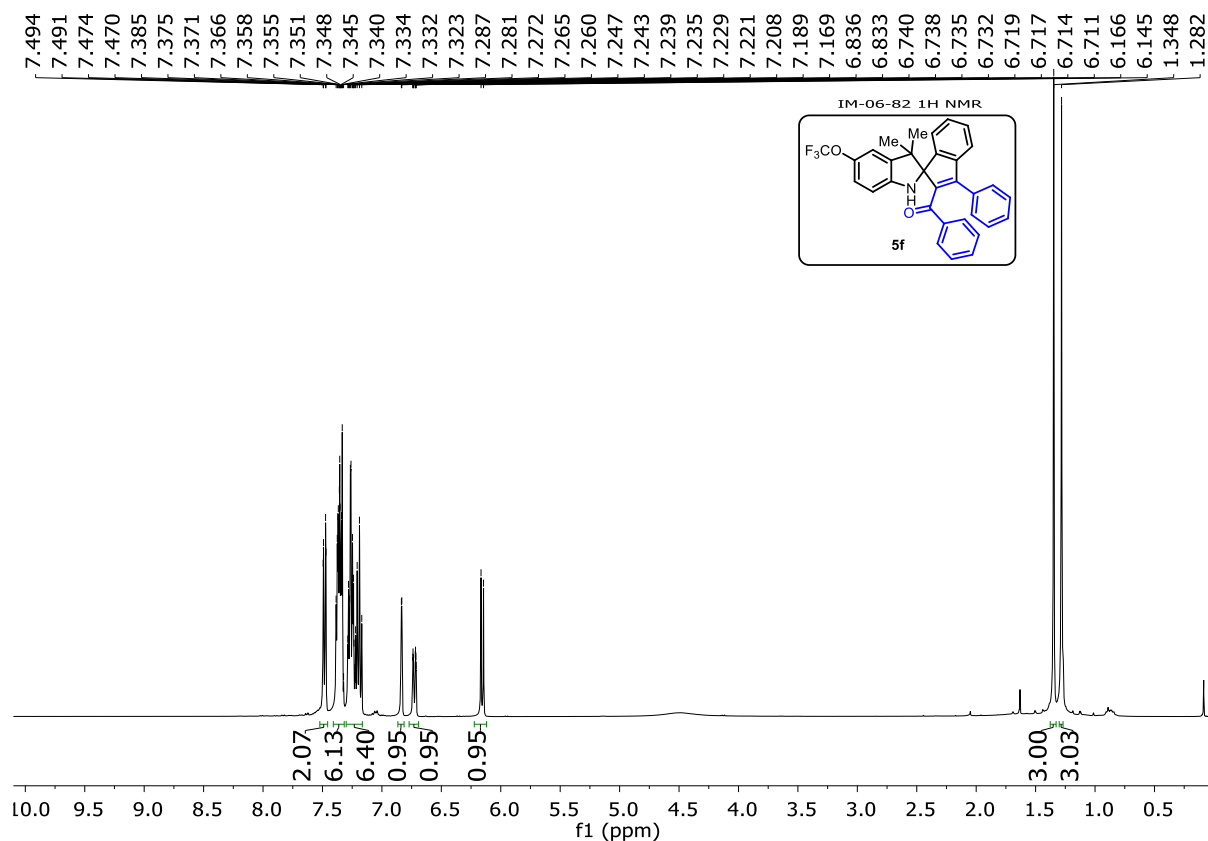

**<sup>13</sup>C{<sup>1</sup>H} NMR of 5f (101 MHz, CDCl<sub>3</sub>):**

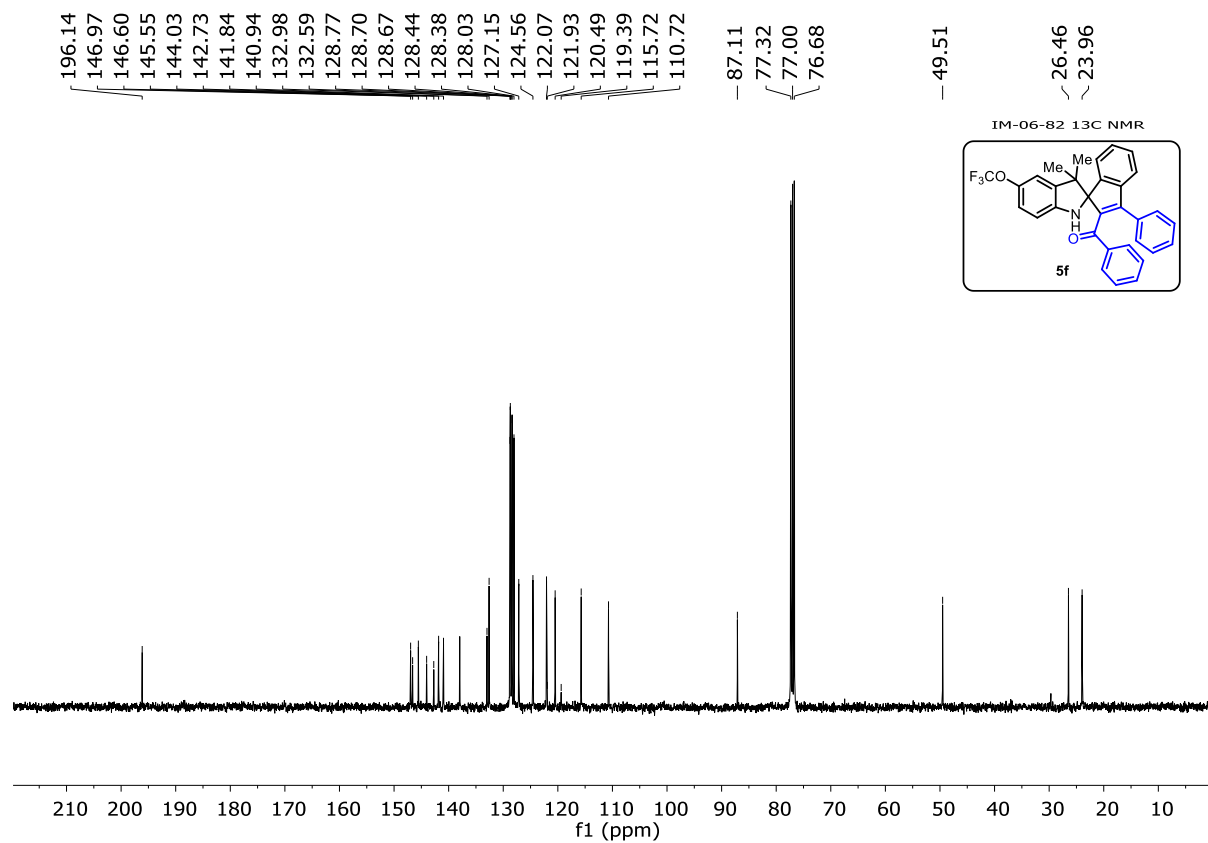

**$^{19}\text{F}$  NMR of 5f (376 MHz,  $\text{CDCl}_3$ ):**

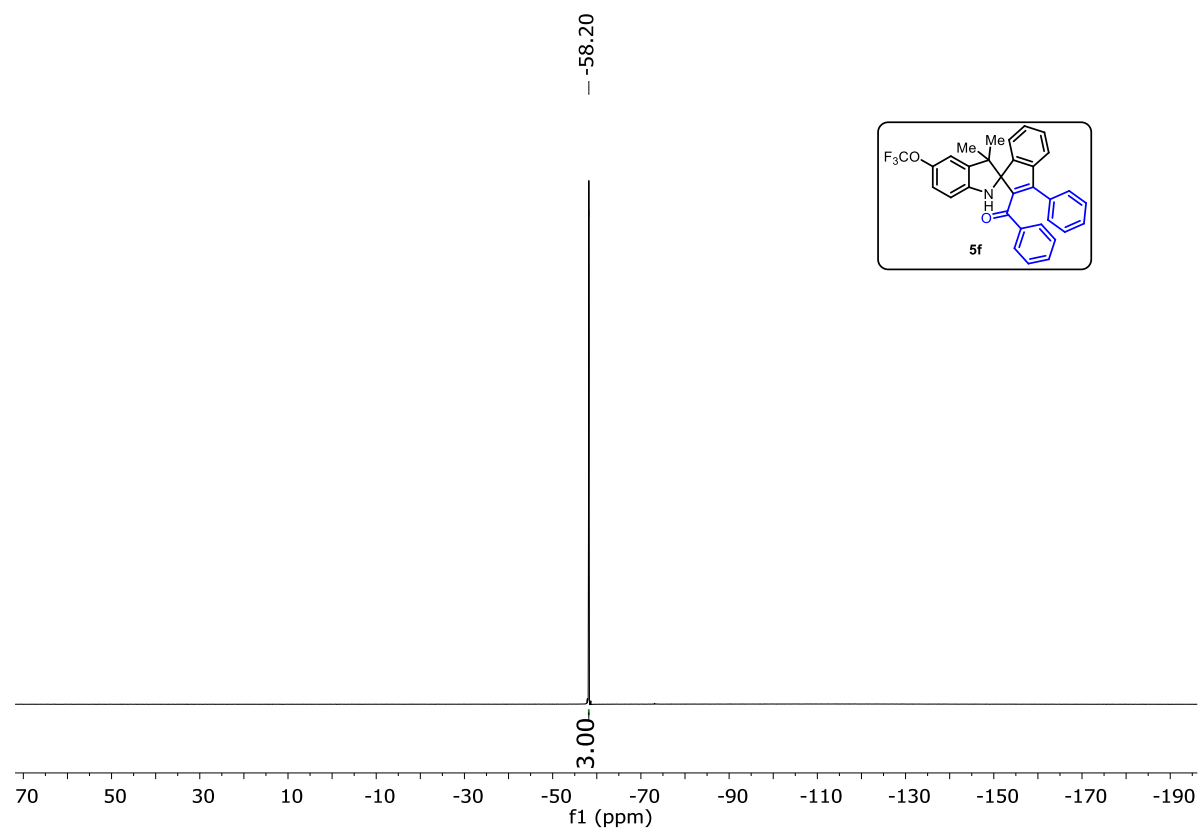

**<sup>1</sup>H NMR of 5g (400 MHz, CDCl<sub>3</sub>):**

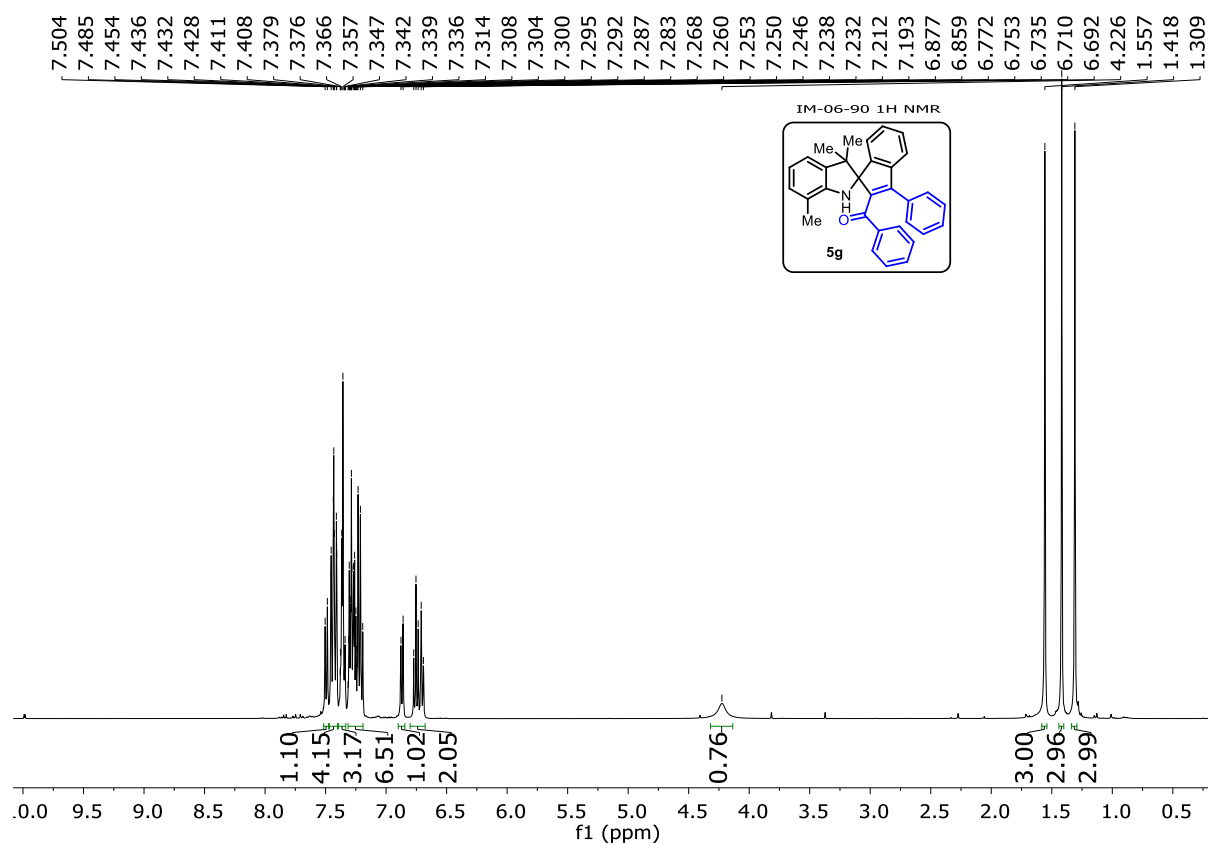

**<sup>13</sup>C{<sup>1</sup>H} NMR of 5g (101 MHz, CDCl<sub>3</sub>):**

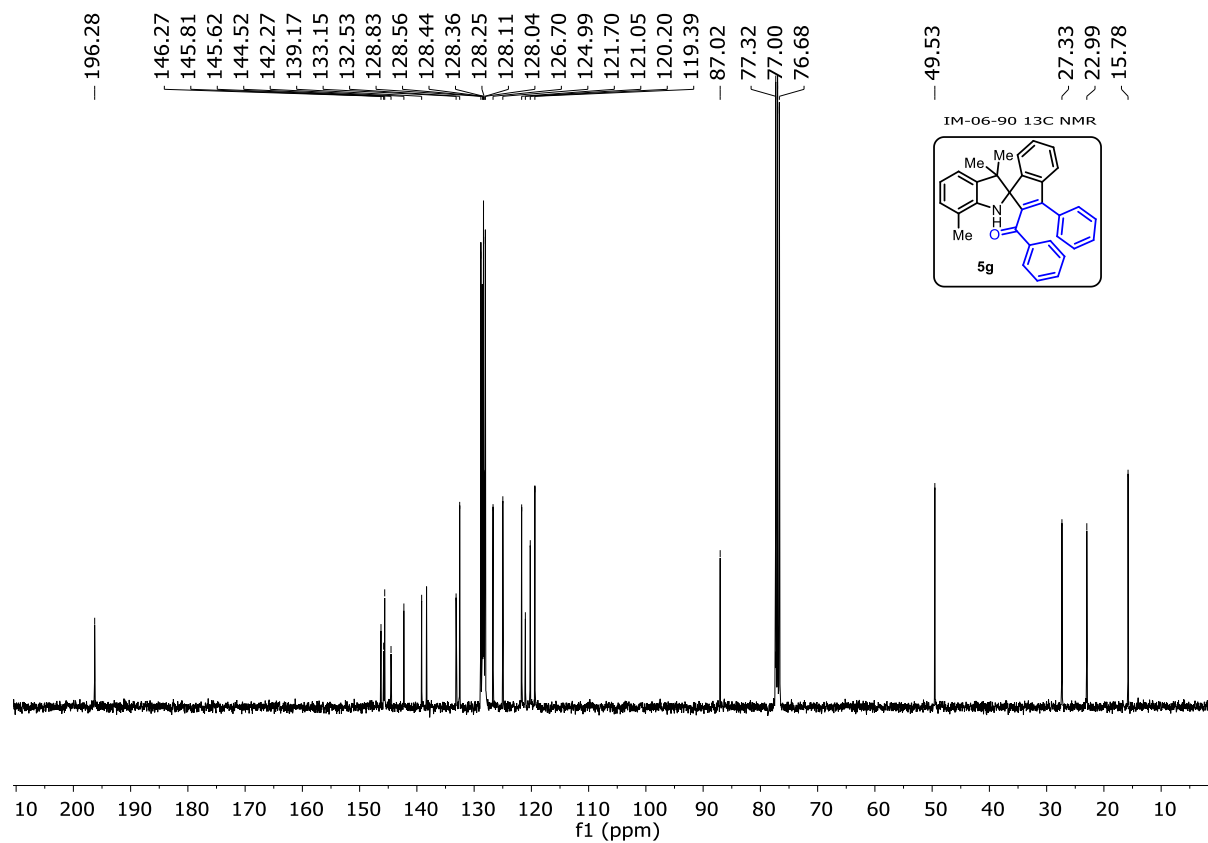

**<sup>1</sup>H NMR of 5h (400 MHz, CDCl<sub>3</sub>):**

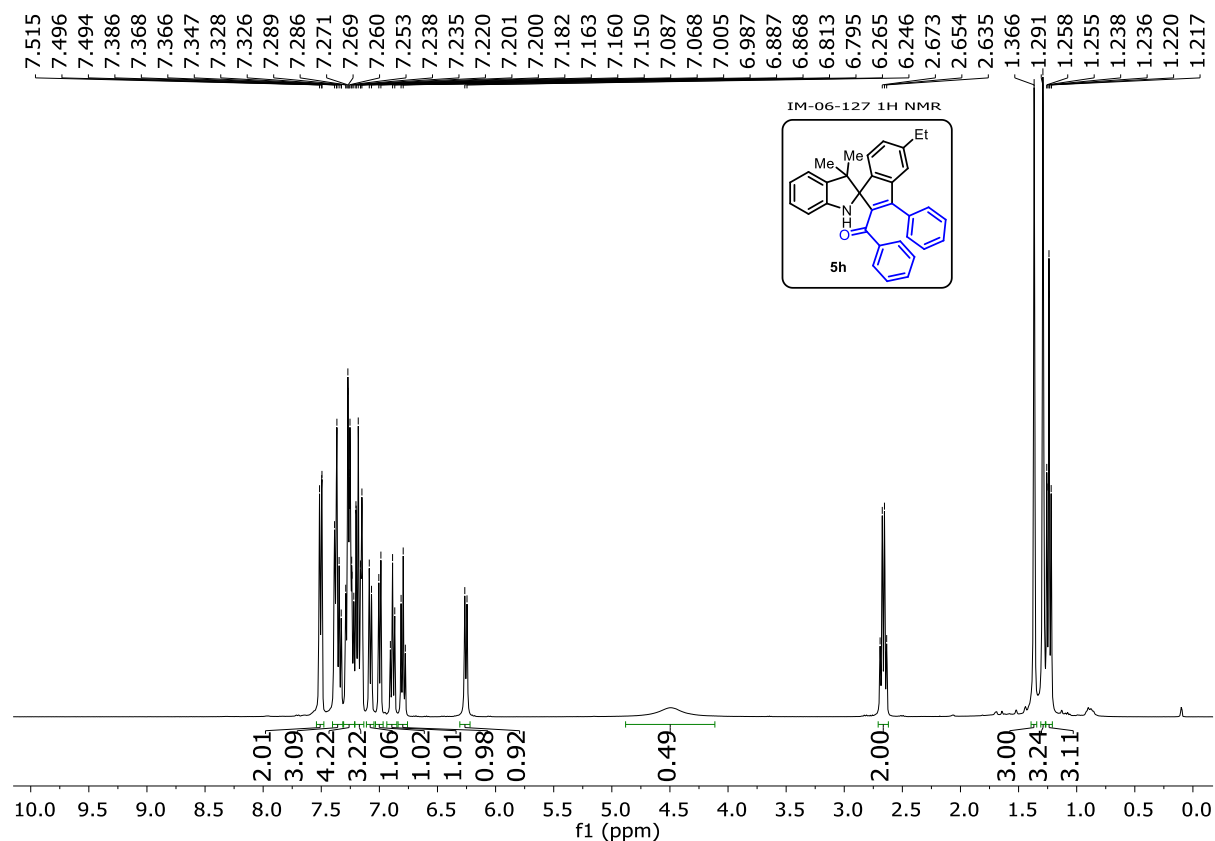

**<sup>13</sup>C{<sup>1</sup>H} NMR of 5h (101 MHz, CDCl<sub>3</sub>):**

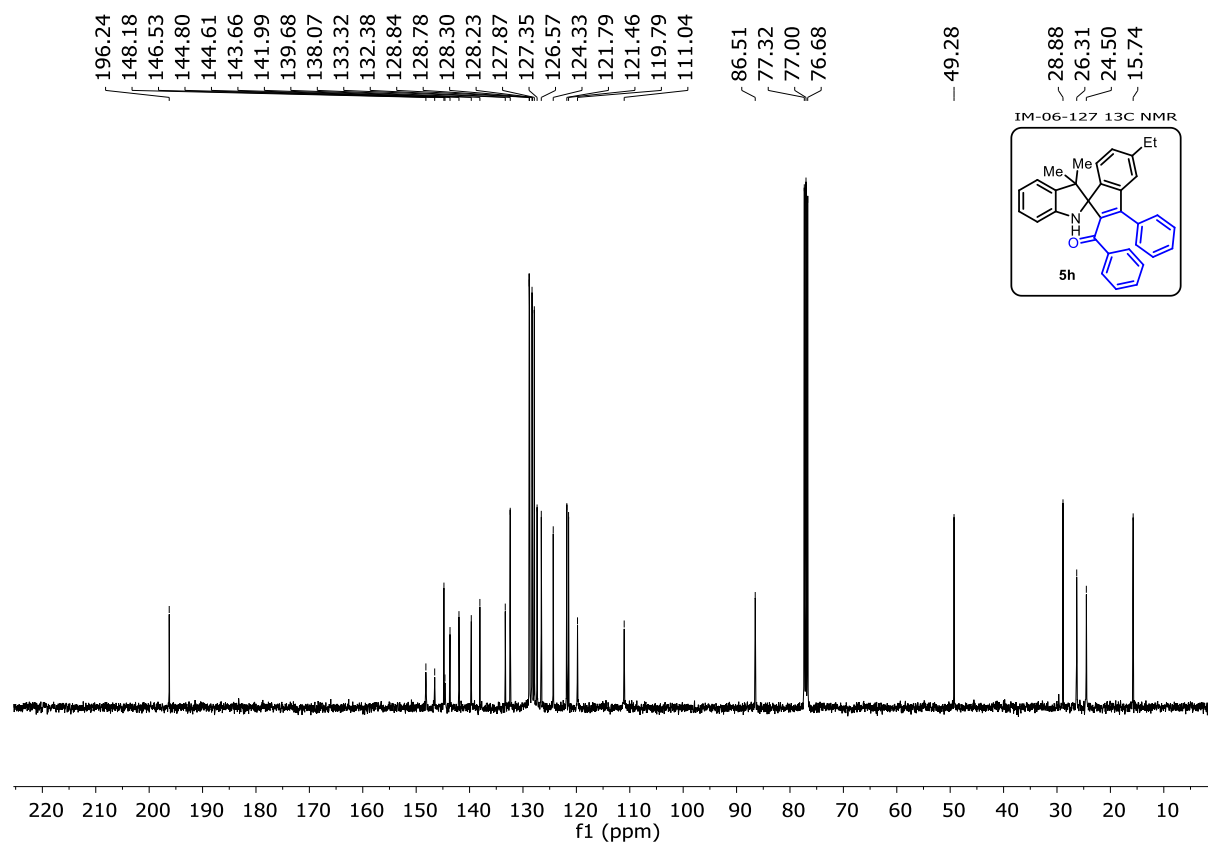

**<sup>1</sup>H NMR of 5i (400 MHz, CDCl<sub>3</sub>):**

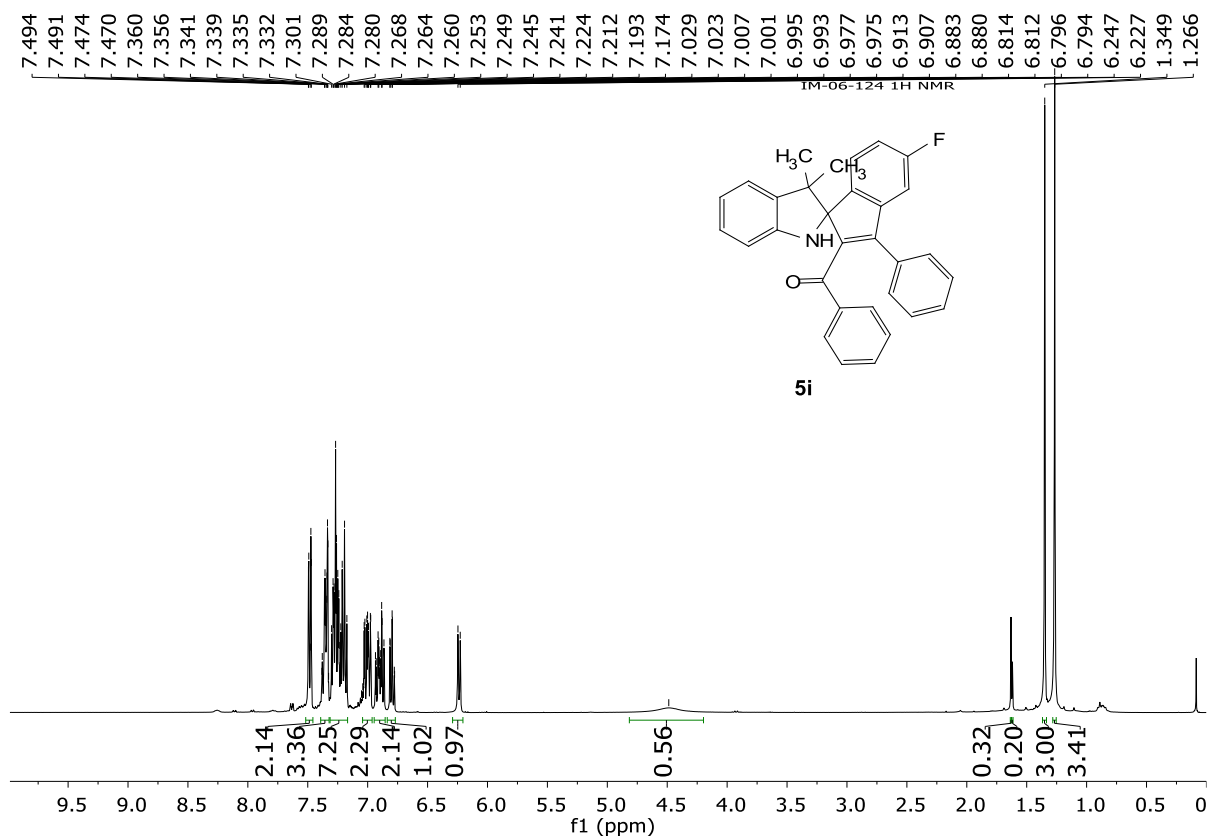

**<sup>13</sup>C{<sup>1</sup>H} NMR of 5i (101 MHz, CDCl<sub>3</sub>):**

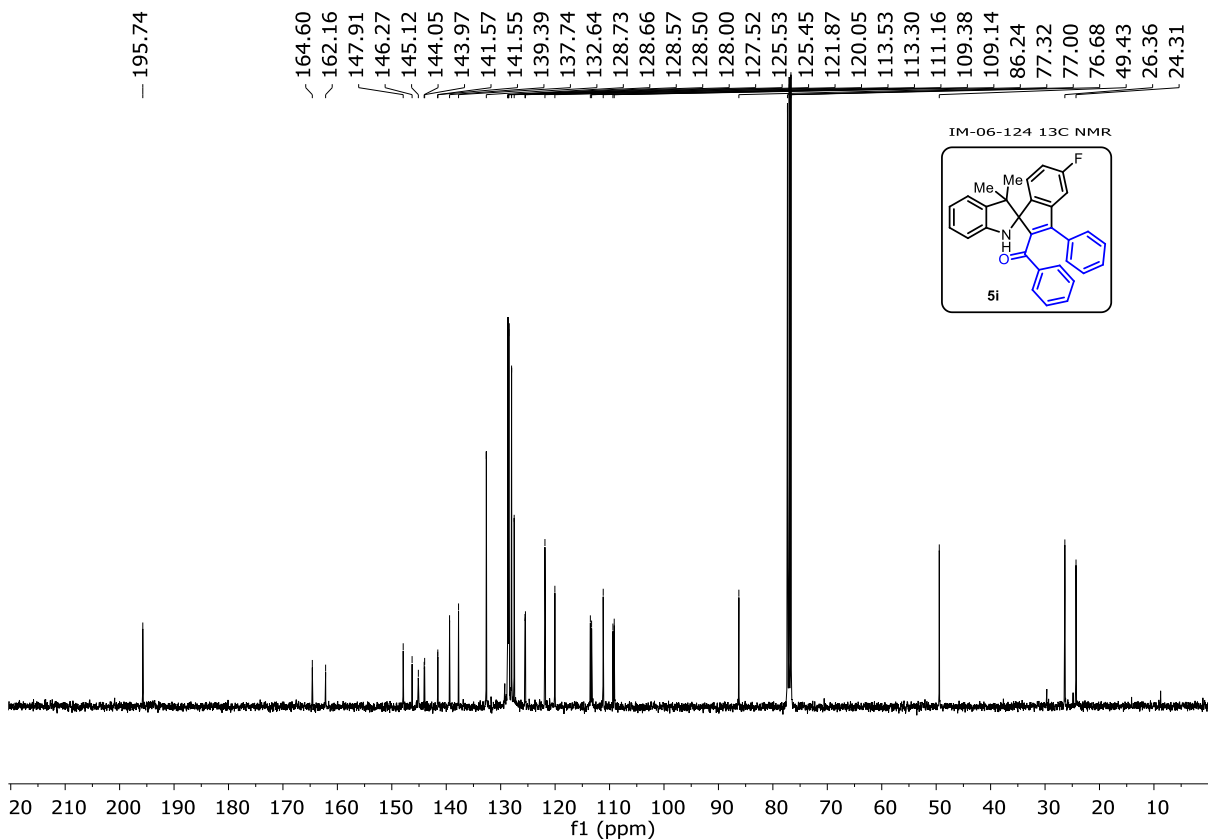

**$^{19}\text{F}$  NMR of 5i (376 MHz,  $\text{CDCl}_3$ ):**

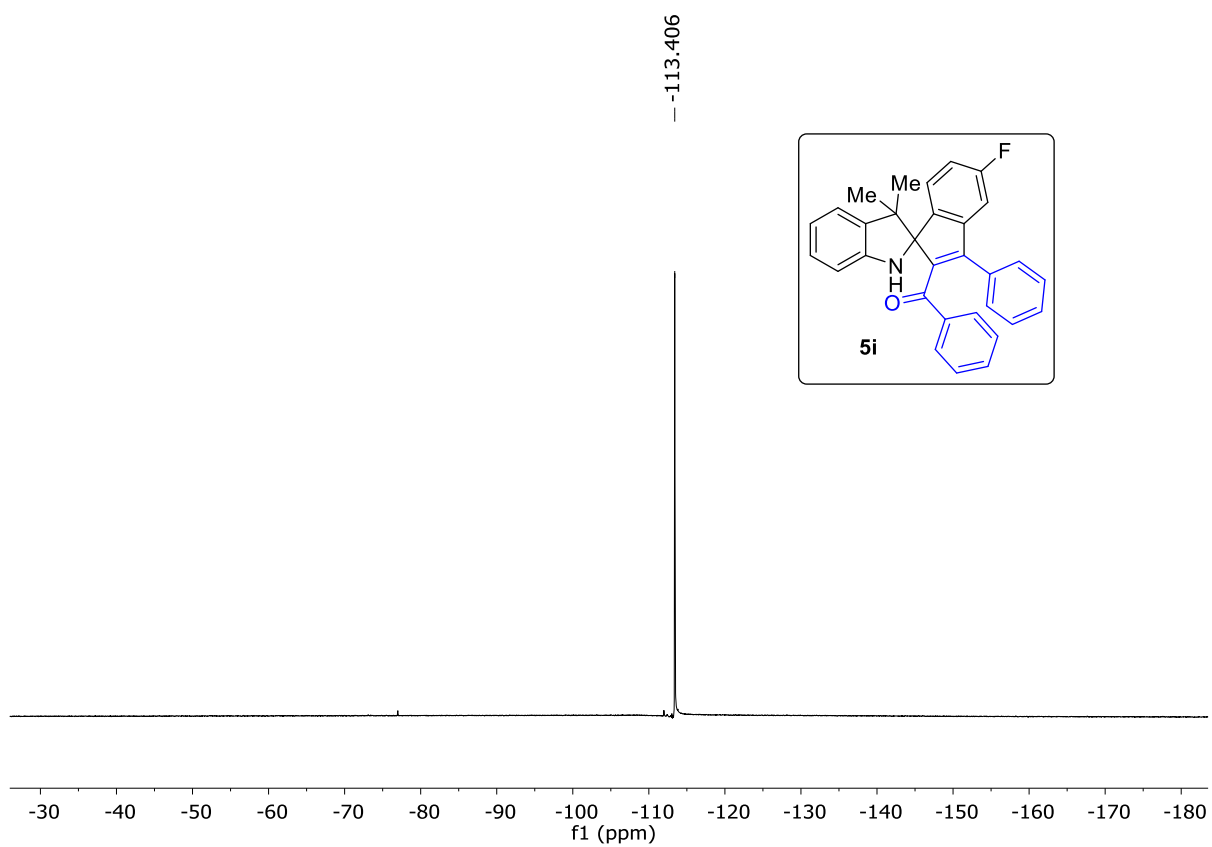

**<sup>1</sup>H NMR of 5j (400 MHz, CDCl<sub>3</sub>):**

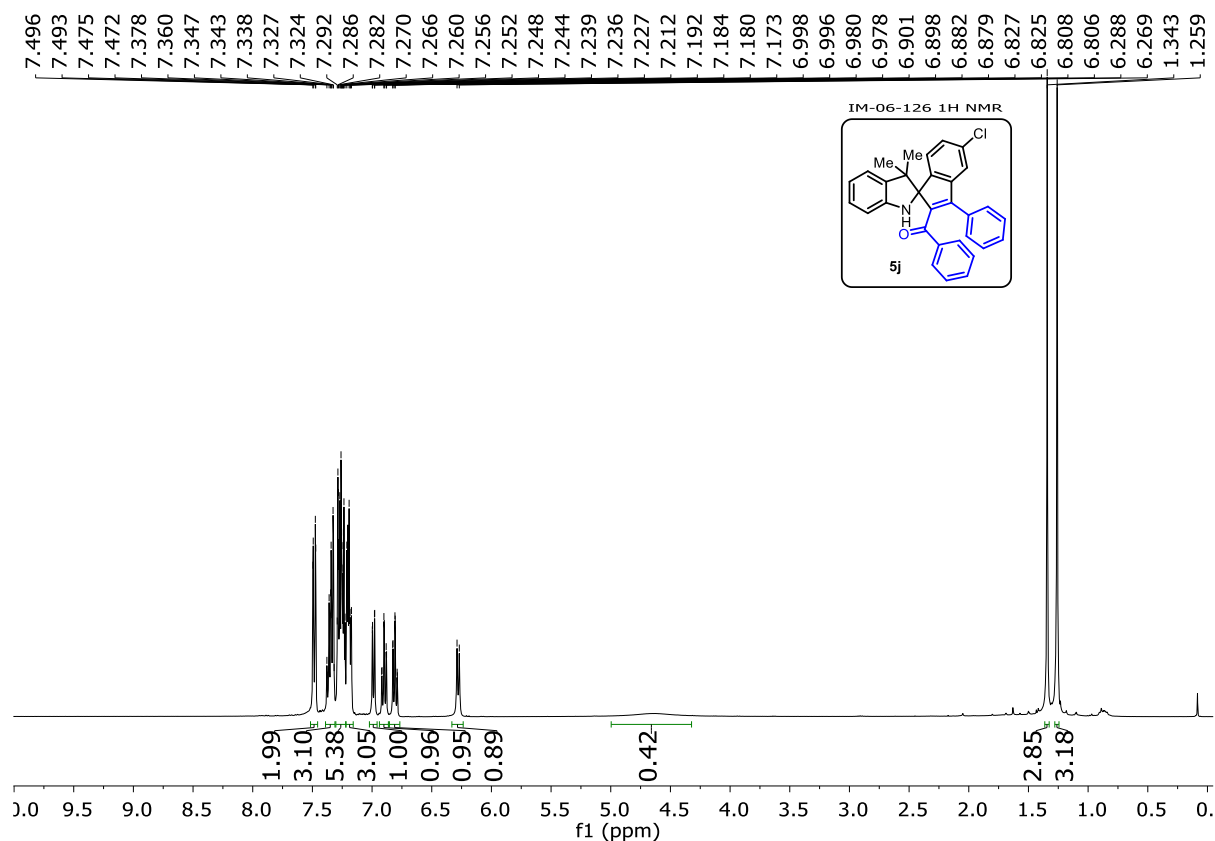

**<sup>13</sup>C{<sup>1</sup>H} NMR of 5j (101 MHz, CDCl<sub>3</sub>):**

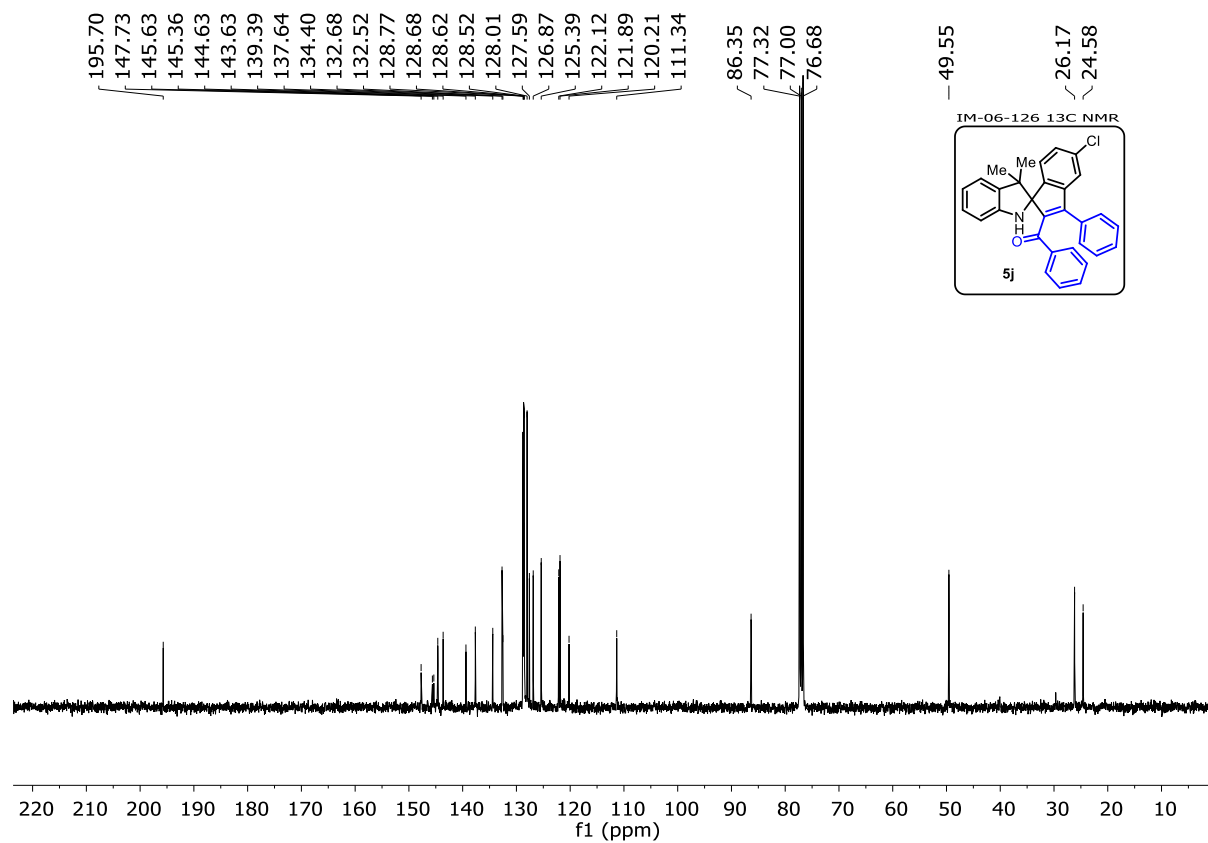

**<sup>1</sup>H NMR of 5k (400 MHz, CDCl<sub>3</sub>):**

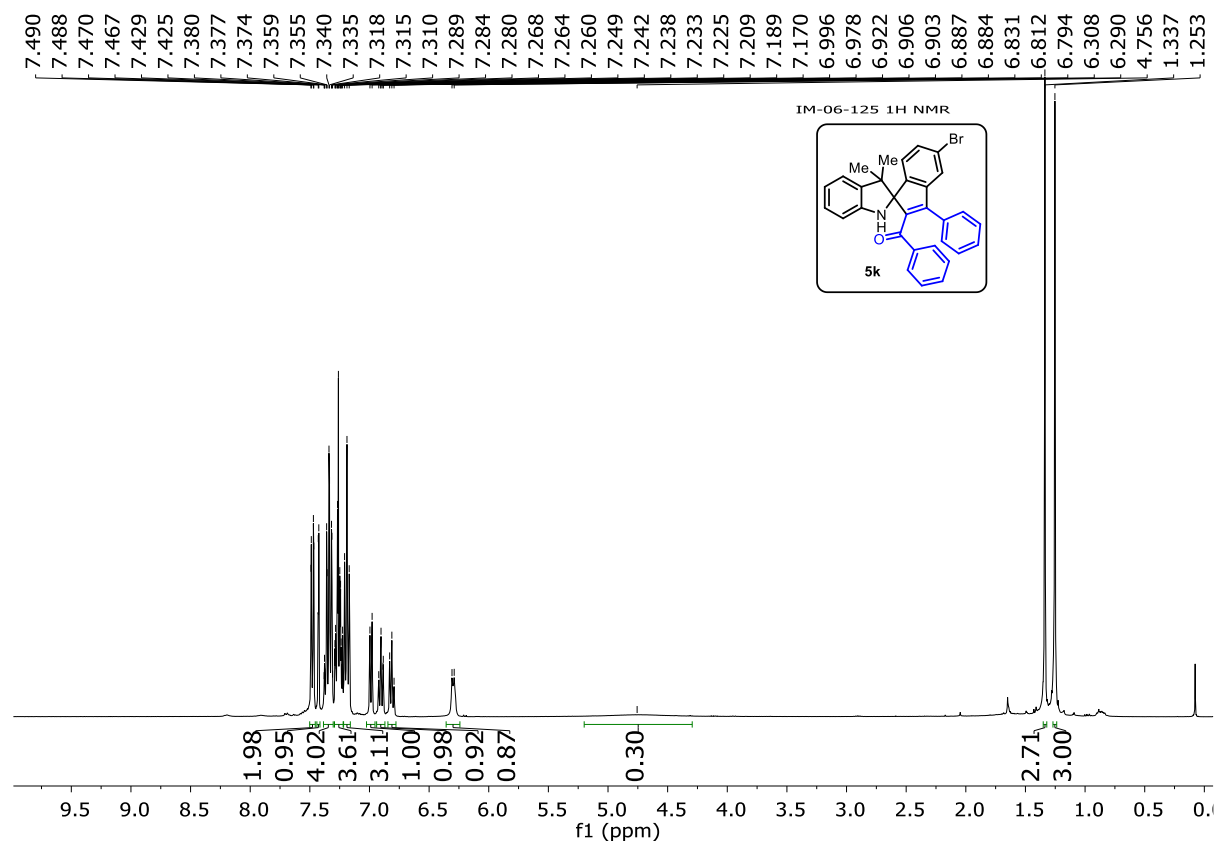

**<sup>13</sup>C{<sup>1</sup>H} NMR of 5k (101 MHz, CDCl<sub>3</sub>):**

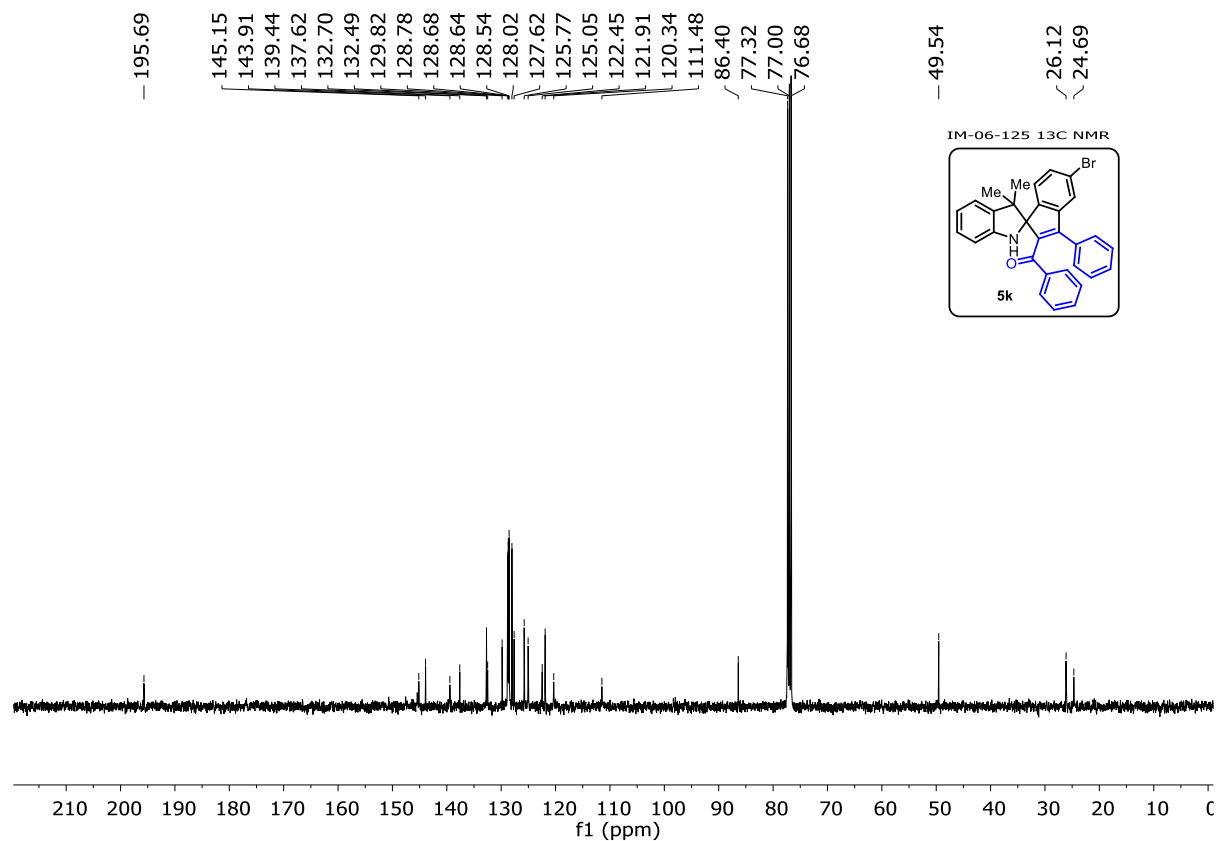

**<sup>1</sup>H NMR of 5l (400 MHz, CDCl<sub>3</sub>):**

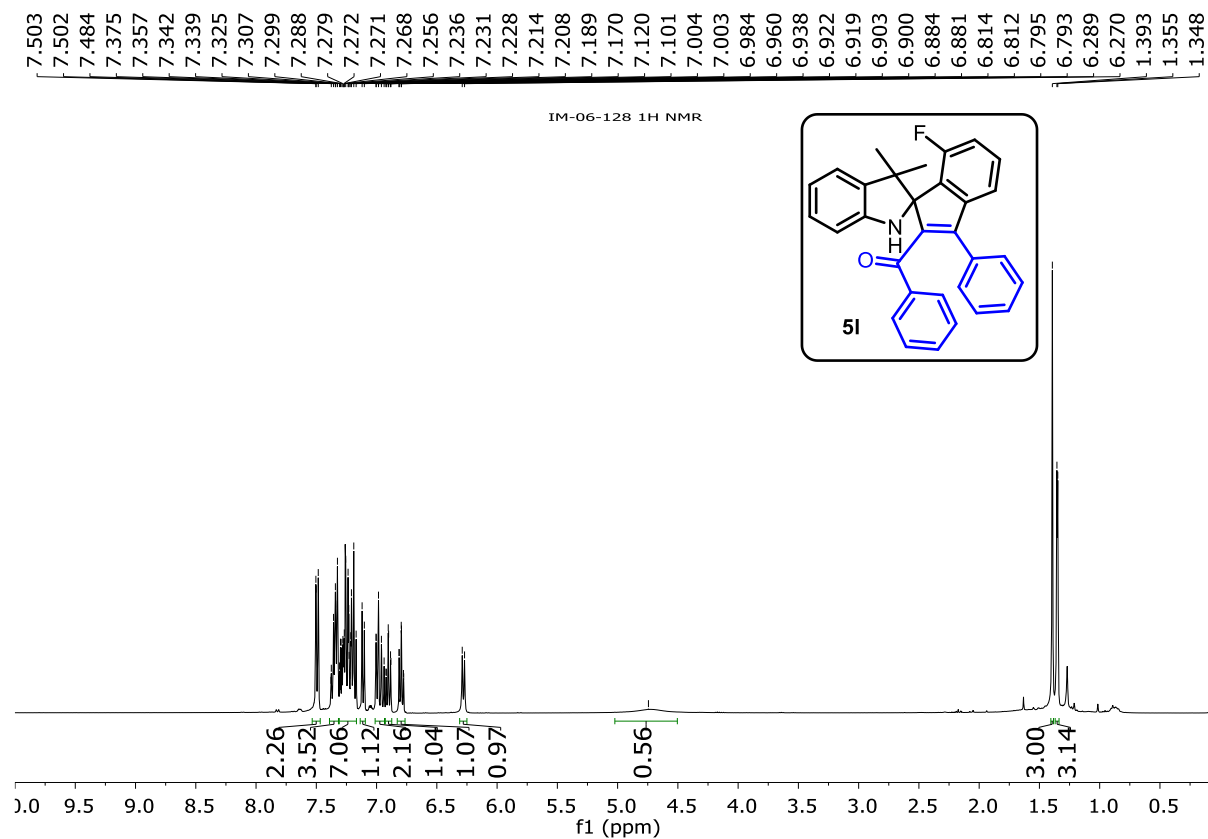

**<sup>13</sup>C{<sup>1</sup>H} NMR of 5l (101 MHz, CDCl<sub>3</sub>):**

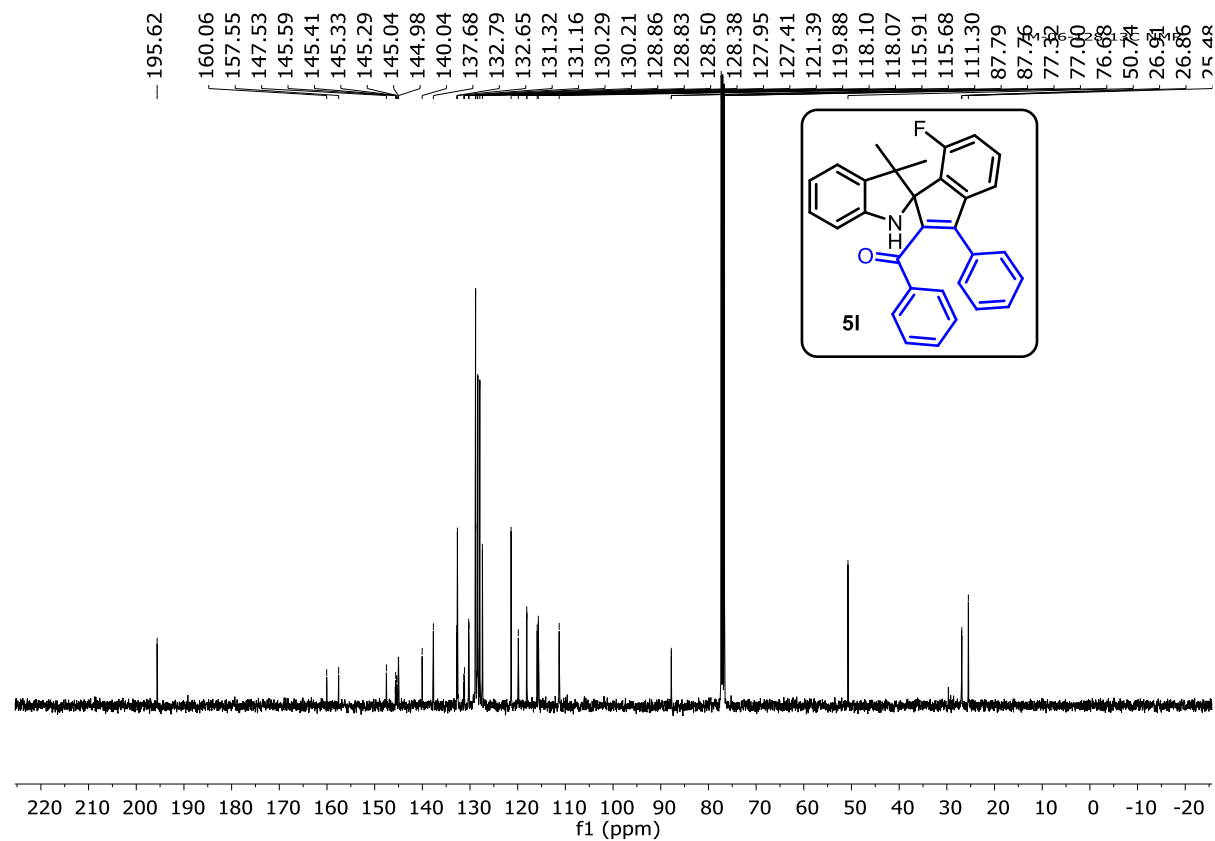

**$^{19}\text{F}$  NMR of 5I (376 MHz,  $\text{CDCl}_3$ ):**

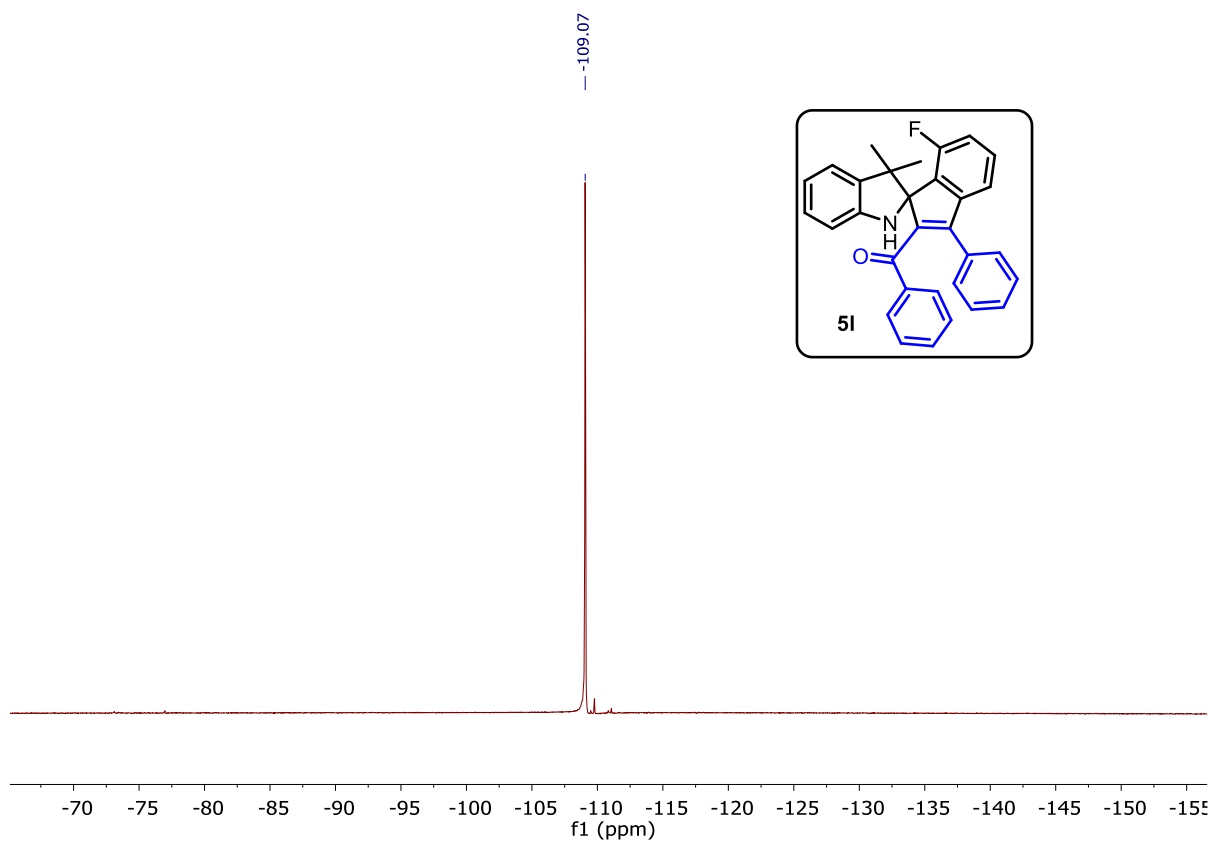

**$^1\text{H}$  NMR of 5m and 5m' (400 MHz,  $\text{CDCl}_3$ ):**

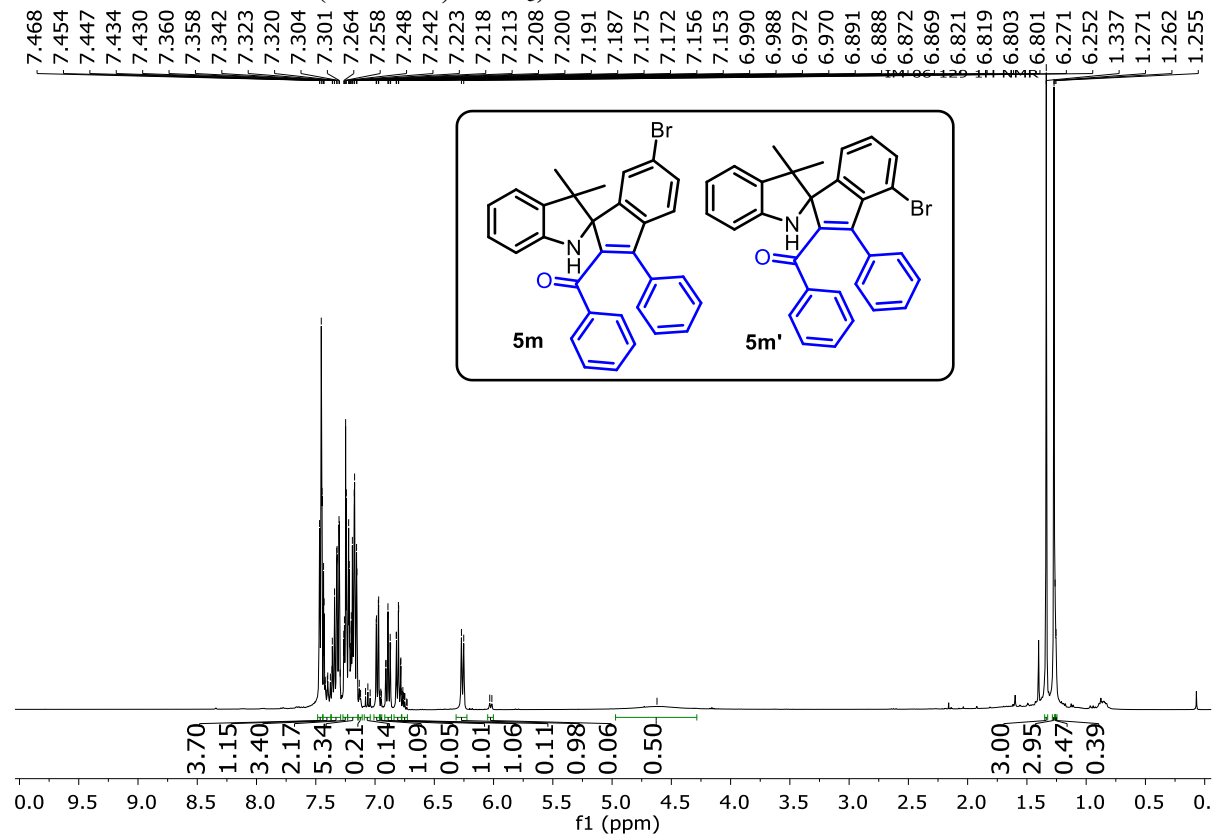

**$^{13}\text{C}\{^1\text{H}\}$  NMR of 5m and 5m' (101 MHz,  $\text{CDCl}_3$ ):**

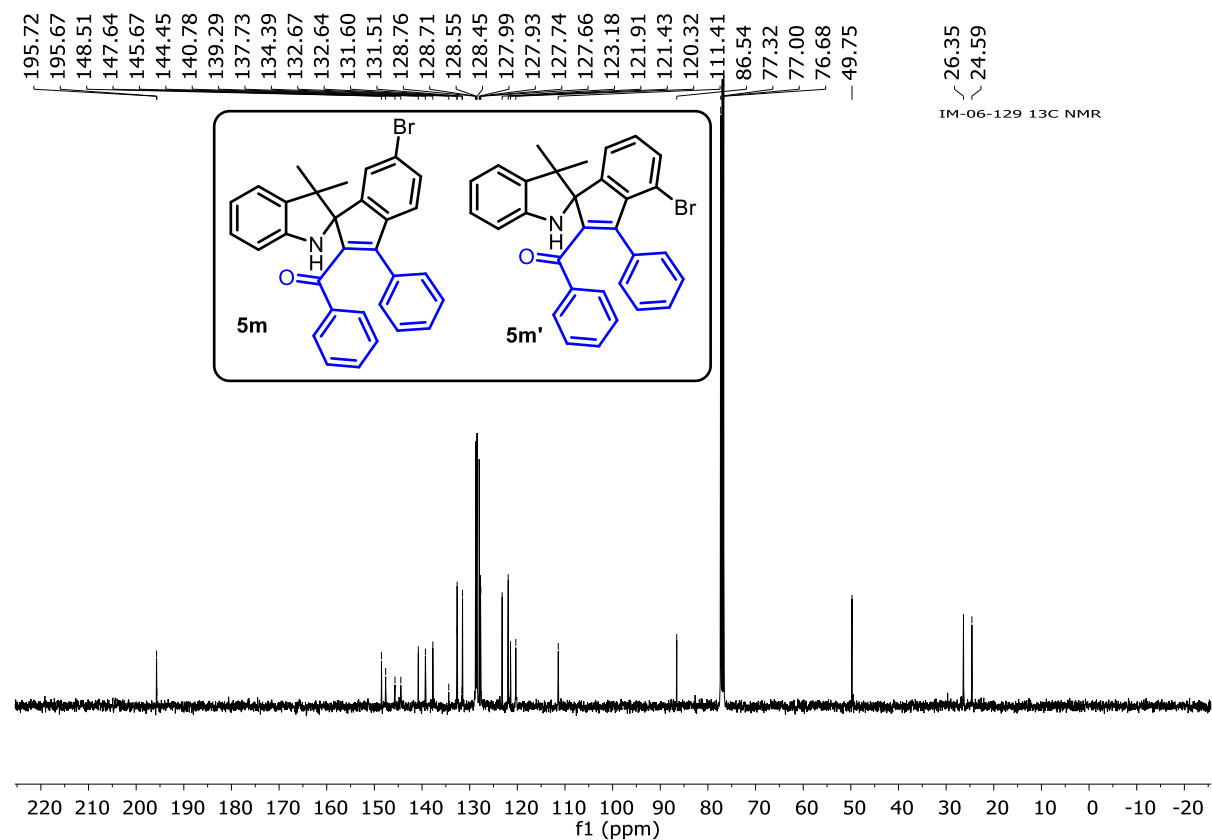

**<sup>1</sup>H NMR of 5n (400 MHz, CDCl<sub>3</sub>):**

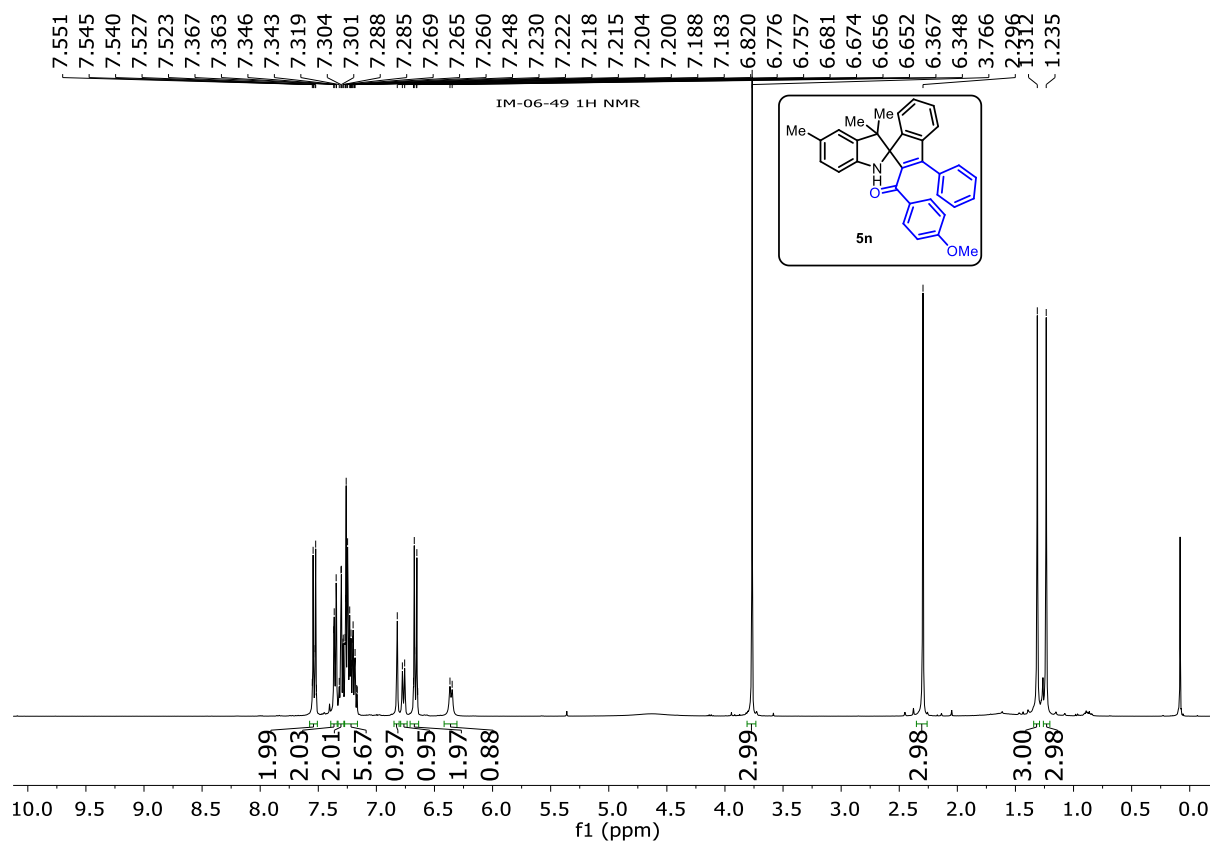

**<sup>13</sup>C{<sup>1</sup>H} NMR of 5n (101 MHz, CDCl<sub>3</sub>):**

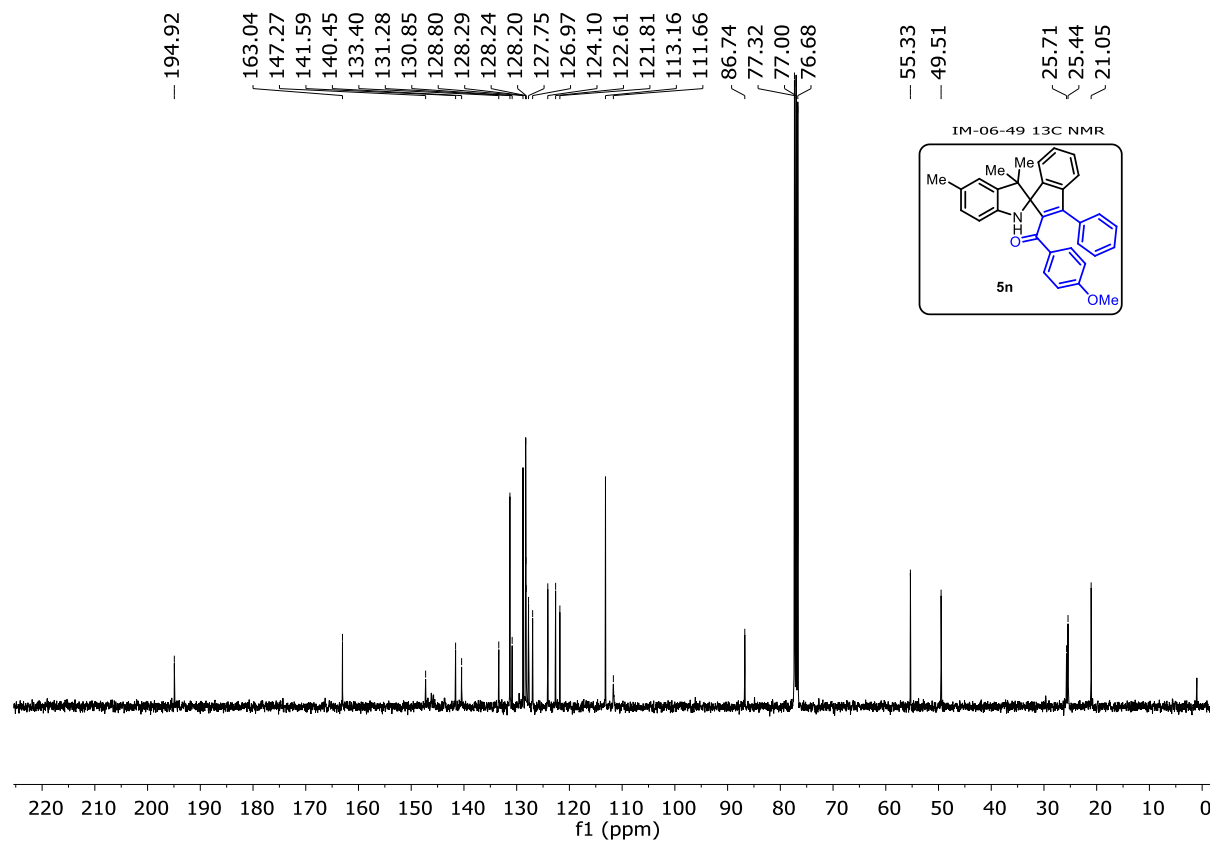

**<sup>1</sup>H NMR of 5o (400 MHz, CDCl<sub>3</sub>):**

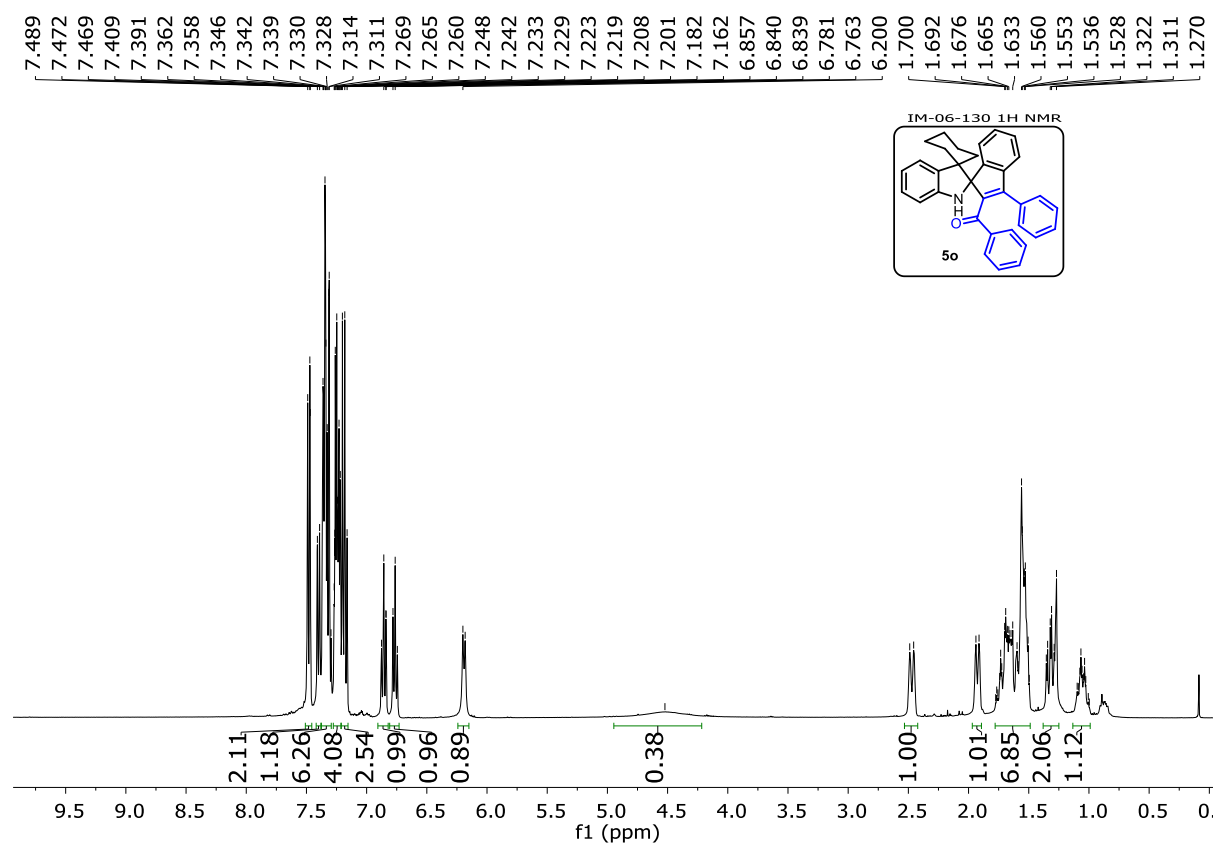

**<sup>13</sup>C{<sup>1</sup>H} NMR of 5o (101 MHz, CDCl<sub>3</sub>):**

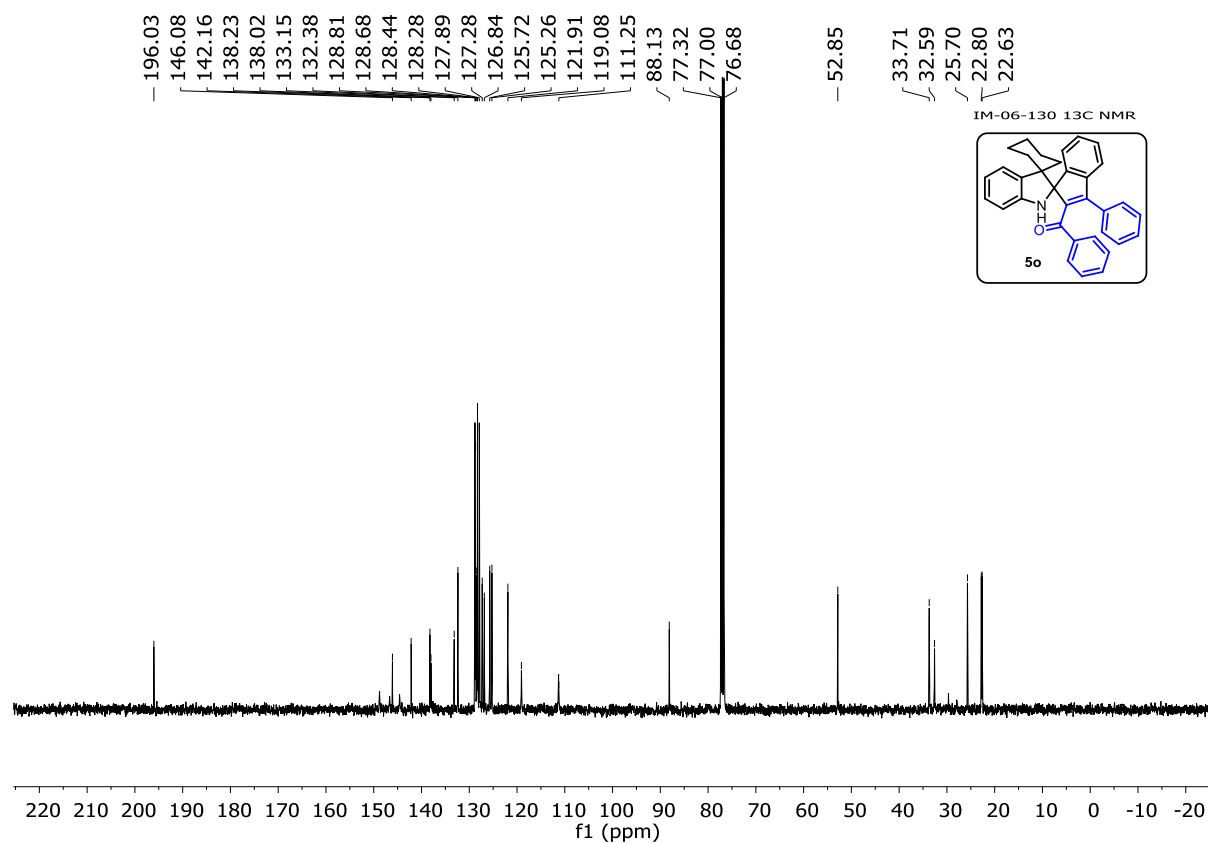

**<sup>1</sup>H NMR of 5p (400 MHz, CDCl<sub>3</sub>):**

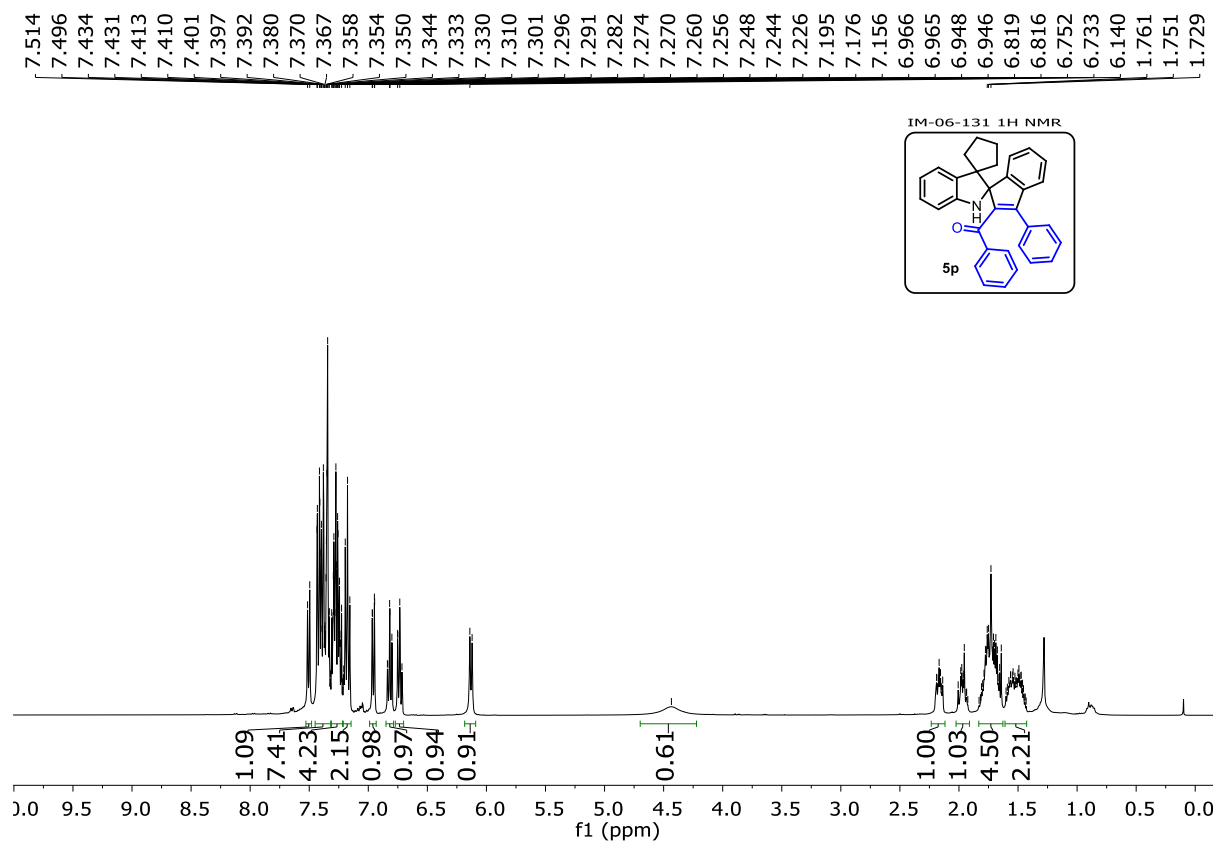

**<sup>13</sup>C{<sup>1</sup>H} NMR of 5p (101 MHz, CDCl<sub>3</sub>):**

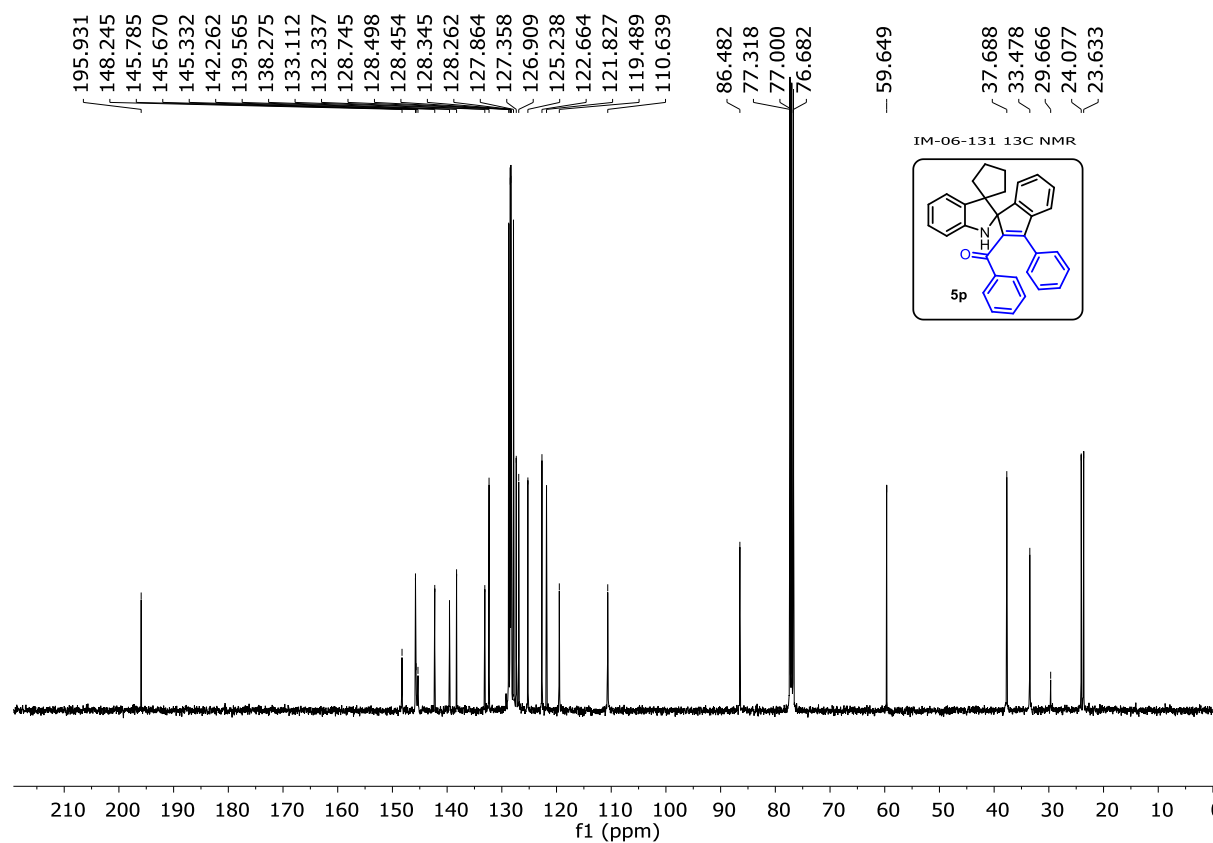

**<sup>1</sup>H NMR of Rh-1a (400 MHz, CDCl<sub>3</sub>):**

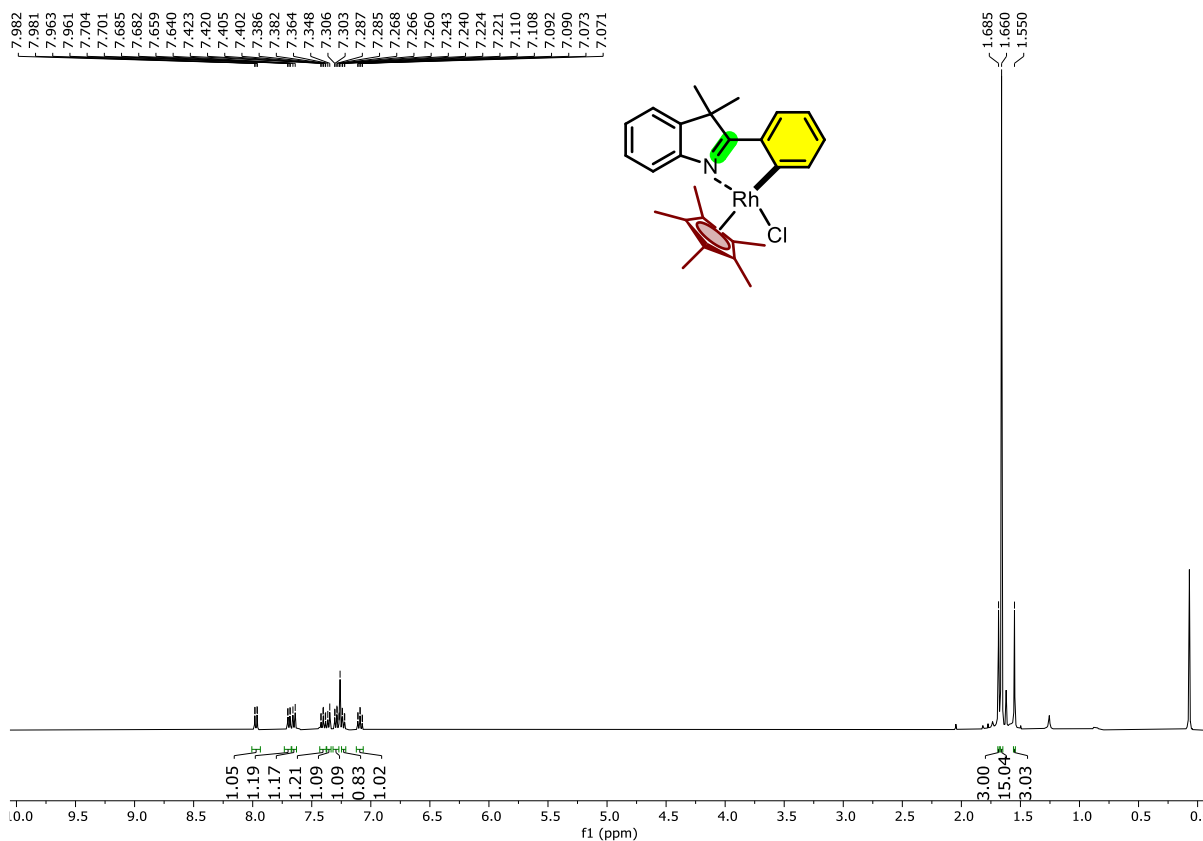

**<sup>13</sup>C{<sup>1</sup>H} NMR of Rh-1a (101 MHz, CDCl<sub>3</sub>):**

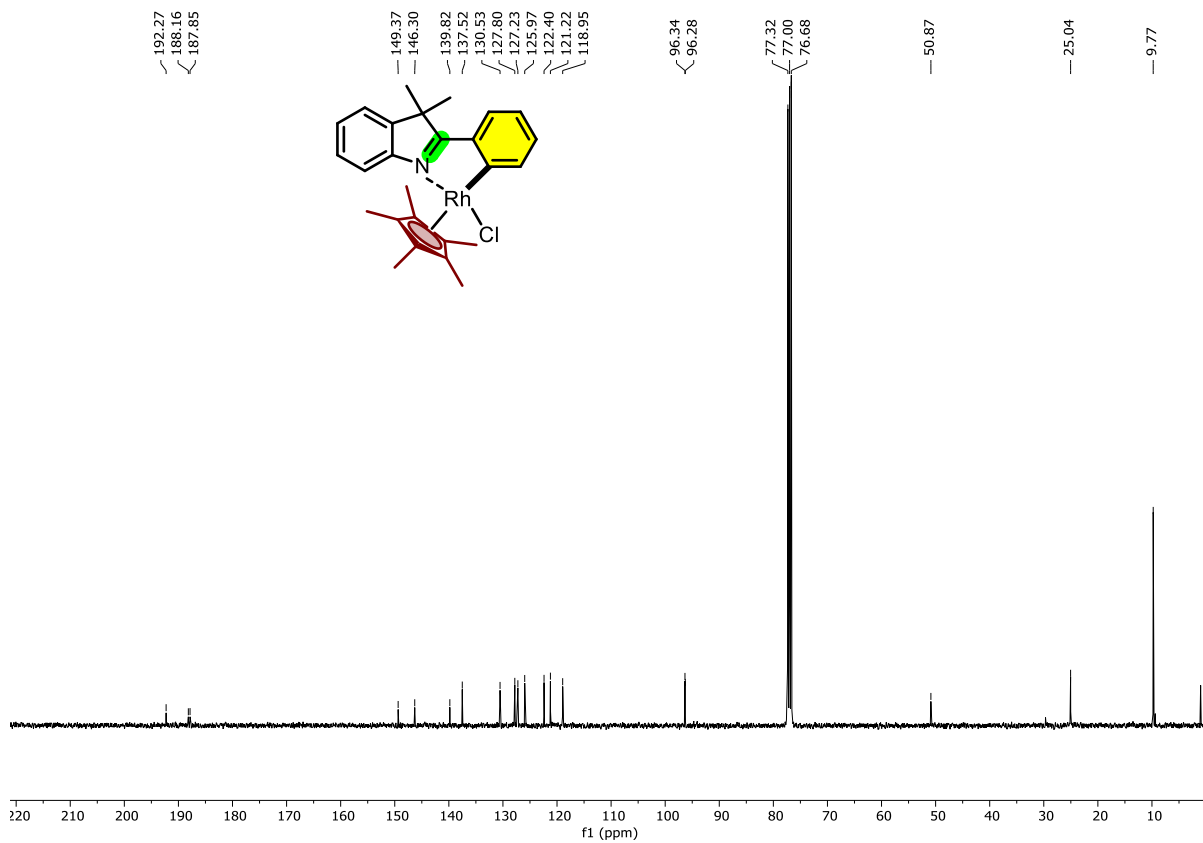

\*\*\*End\*\*\*
